# Supplementary material
Source: PubMed Central journal article supplement (PMC3526187)
Supplement: NIHMS417994-supplement-supplement_1.pdf [file NIHMS417994-supplement-supplement_1.pdf]

## **SUPPLEMENTAL MATERIAL CIRCVOQ\_2012\_965368**

### **MASOUDI FA ET AL. ONLINE APPENDICES**

- A. List of Participating Implant Hospitals and Site Enrollment
- B. Data Dictionary for NCDR ICD Registry
- C. Data Dictionary for HMORN VDW
- D. Data Dictionary for ICD Therapy Data Repository
- E. Therapy Abstraction Documents
  - Guidelines
  - Forms and Instructions
  - Shipping transmittal log
  - Intake quality checklist
  - Request for additional data form
- F. Therapy Adjudication Documents
  - Glossary
  - Central Review Form and Instructions
  - Central Resolution Form and Instructions
  - External Adjudication Form and Instructions
  - Adjudication Resolution Form
- G. Abstraction/Adjudication Processes
  - Description
  - Data Flow Diagram
- H. LSICD Therapy Collection Pilot, Selected Results
- J. The CVRN Longitudinal Study of ICDs Investigative Team

**Masoudi FA et al.**

**Appendix A: List of Participating Sites and Enrollment**

| HEALTH PLAN                                 | NUMBER OF SUBJECTS | PERCENTAGE OF SUBJECTS |
|---------------------------------------------|--------------------|------------------------|
| Henry Ford Health System                    | 399                | 15.22                  |
| Kaiser Permanente Colorado                  | 130                | 4.96                   |
| Kaiser Permanente Northern California       | 685                | 26.14                  |
| Kaiser Permanente Northwest                 | 204                | 7.78                   |
| Kaiser Permanente Southern California       | 803                | 30.64                  |
| Marshfield Clinic                           | 288                | 10.99                  |
| Meyers/Fallon Community Health Plan/U. Mass | 112                | 4.27                   |
| <b>TOTAL ENROLLMENT</b>                     | 2621               | 100                    |

**Masoudi FA et al.**

**Appendix B: Data Dictionary for NCDR ICD Registry**

**ICD Registry™**  
**Implantable Cardioverter Defibrillators Registry v1.08**  
**Data Dictionary - Definitions Only**

**A. Participant Administration**

---

**Field Name:** Participant ID **Seq No:** 1000

**Definition:** Participant ID is a unique number assigned to each Participant by the ACC-NCDR. An ACC-NCDR Participant is defined as one entity that signs a Participation Agreement with the ACC, submits one data submission file to the harvest, and gets back one Outcomes Report on their data.

Each Participant's data if submitted to harvest must be in one data submission file. If one Participant keeps their data in more than one file (e.g. at two sites), then the data must be combined into a single data submission file for the harvest.

If two or more Participants share a single purchased software, and enter cases into one database, then the data must be exported into different data submission files, one for each Participant ID.

**Selections:**

---

**Field Name:** Participant Name **Seq No:** 1010

**Definition:** The full official hospital name of the facility where the implant procedure was performed. Values should be full, official hospital names with no abbreviations or variations in spelling for a single hospital.

**Selections:**

---

**Field Name:** Medicare Provider Number **Seq No:** 1015

**Definition:** Indicate the medicare provider number of the facility at which the patient received the implant.

**Selections:**

---

**Field Name:** Participant NPI **Seq No:** 1016

**Definition:** Indicate the hospital's (N)ational (P)rovider (I)dentifier. NPIs, assigned by CMS, are used to uniquely identify hospitals for Medicare billing purposes.

**Selections:**

---

**Field Name:** Timeframe of Data Submission **Seq No:** 1020

**Definition:** Indicate the timeframe of data included in the data submission. Format: YYYYQQ. e.g. 2005Q4

**Selections:**

---

**Field Name:** Transmission Number **Seq No:** 1040

**Definition:** A unique number created and automatically inserted by the software. It identifies the number of times the software has created data submission files. The transmission number should be incremented by one every time the data submission files are exported. The transmission number should never be repeated.

**Selections:**

---

**Field Name:** Software Vendor Identifier **Seq No:** 1050

---

**ICD Registry™**  
**Implantable Cardioverter Defibrillators Registry v1.08**  
**Data Dictionary - Definitions Only**

---

**Definition:** Software Vendor Identification (agreed upon by mutual selection between the vendor and the ACC) to identify software vendor. Vendors must use consistent name identification across sites. Changes to Vendor Name Identification must be approved by the ACC.

**Selections:**

---

**Field Name:** Vendor software version **Seq No:** 1060

**Definition:** Vendor's software product name and version number identifying the software which created this record (assigned by vendor). Vendor controls the value in this field. Version passing certification/harvest testing will be noted at the ACC.

**Selections:**

---

**Field Name:** Registry Identifier **Seq No:** 1070

**Definition:** The ACC-NCDR Registry Identifier describes which ACC data registry these records apply. It is implemented in the software at the time the data is collected and the records are created. This is entered into the schema automatically by software.

**Selections:**

---

**Field Name:** Registry Version **Seq No:** 1080

**Definition:** Registry Version describes the version number of the Data Specifications/Dictionary, to which each record conforms. It identifies which fields should have data, and what are the valid data for each field. It is the version implemented in the software at the time the data is collected and the records are created. This is entered into the schema automatically by software.

**Selections:**

---

**Field Name:** Patient Population **Seq No:** 1090

**Definition:** Indicate the population of patients that should be included in the data export and submitted to the registry.

**Selections:**

| Coding/Sort | Selection(Choose one)           | Explanation                                                                                                       |
|-------------|---------------------------------|-------------------------------------------------------------------------------------------------------------------|
| 1           | All Patients                    | All patients regardless of insurance payor and ICD Indication.                                                    |
| 2           | CMS Primary Prevention Patients | Patients with a Primary or Secondary insurance payor of "Medicare" and an ICD Indication of "Primary Prevention". |

---

**Field Name:** Data Submission File Password **Seq No:** 1100

**Definition:** Indicates the ACC assigned password that should be applied to the data submission zip file.

**Selections:**

---

**Field Name:** Auxiliary 0 **Seq No:** 1110

**Definition:** Not for participant use. A 50 character text field that may be used to collect additional administrative information about the data submission.

**Selections:**

---

**ICD Registry™**  
**Implantable Cardioverter Defibrillators Registry v1.08**  
**Data Dictionary - Definitions Only**

**B. Demographics**

**Field Name:** Patient Last Name **Seq No:** 2000

**Definition:** Indicate the patient's last name.

**Selections:**

**Field Name:** Patient First Name **Seq No:** 2010

**Definition:** Indicate the patient's first name.

**Selections:**

**Field Name:** Patient Middle Name **Seq No:** 2020

**Definition:** Indicate the patient's middle name or middle initial.

**Selections:**

**Field Name:** Patient SSN **Seq No:** 2030

**Definition:** Indicate the nine digit patient's United States Social Security Number (SSN). If the patient does not have a US assigned SSN, then leave the SSN blank.

**Selections:**

**Field Name:** Unique Patient ID **Seq No:** 2040

**Definition:** This is an arbitrary number (not a recognizable ID like SSN or Medical Record Number) that uniquely identifies each patient. Once assigned to a patient at a health care facility, this will never be changed or reassigned to a different patient. If a patient returns to the same hospital, or for follow-up, they will receive this same unique patient identifier.

**Selections:**

**Field Name:** Other ID **Seq No:** 2045

**Definition:** An additional 'optional' patient identifier, such as medical record number, that can be associated with the patient.

**Selections:**

**Field Name:** Patient DOB **Seq No:** 2050

**Definition:** Indicate the patient's date of birth.

**Selections:**

**Field Name:** Gender **Seq No:** 2060

**Definition:** Indicate the patient's gender at birth.

**Selections:**

| Coding/Sort | Selection(Choose one) | Explanation |
|-------------|-----------------------|-------------|
| 1           | Male                  |             |
| 2           | Female                |             |

**Field Name:** Race **Seq No:** 2070

**ICD Registry™**  
**Implantable Cardioverter Defibrillators Registry v1.08**  
**Data Dictionary - Definitions Only**

---

**Definition:** Indicate the patient's race as determined by the patient/family.

**Selections:**

| Coding/Sort | Selection(Choose one)         | Explanation |
|-------------|-------------------------------|-------------|
| 1           | White                         |             |
| 2           | Black/African American        |             |
| 4           | Asian                         |             |
| 5           | American Indian/Alaska Native |             |
| 6           | Native Hawaiian               |             |
| 7           | Other                         |             |

**Field Name:** Hispanic Ethnicity

**Seq No:** 2075

**Definition:** Indicate if the patient is of hispanic ethnicity.

**Selections:**

| Coding/Sort | Selection(Choose one) | Explanation |
|-------------|-----------------------|-------------|
| 0           | No                    |             |
| 1           | Yes                   |             |

**Field Name:** Auxiliary 1

**Seq No:** 2080

**Definition:** For participant use only. A 50 character text field that may be used to collect additional information about the patient or admission.

**Selections:**

**Field Name:** Auxiliary 2

**Seq No:** 2090

**Definition:** For participant use only. A 50 character text field that may be used to collect additional information about the patient or admission.

**Selections:**



**ICD Registry™**  
**Implantable Cardioverter Defibrillators Registry v1.08**  
**Data Dictionary - Definitions Only**

**C. Admission**

**Field Name:** Admission Date **Seq No:** 3000

**Definition:** Indicate the date on which the patient was admitted to the hospital for the current stay.

**Selections:**

**Field Name:** Date of Implant **Seq No:** 3010

**Definition:** Indicate the date of the ICD implant.

Note: In the event that multiple ICDs were implanted/explanted during a single admission, this is the date of the first/initial ICD implant. For clarification, see Sequence Numbers 3507, 3508.

**Selections:**

**Field Name:** Insurance Payor-Primary **Seq No:** 3020

**Definition:** Indicate the patient's primary insurance payor.

**Selections:**

| Coding/Sort | Selection(Choose one) | Explanation                                                                                                                                                                                                                                                            |
|-------------|-----------------------|------------------------------------------------------------------------------------------------------------------------------------------------------------------------------------------------------------------------------------------------------------------------|
| 1           | Government            | Government refers to patients who are covered by government-reimbursed care. In the U.S. this includes, Medicare, Medicaid, (including all state/federal Medicaid-type programs), TriCare, the Veteran's Administration Health Plan, and Federal Employee's Insurance. |
| 2           | Commercial            | Commercial refers to all indemnity (fee-for-service) carriers and Preferred Provider Organizations (PPOs) (e.g. Blue Cross/Blue Shield).                                                                                                                               |
| 3           | HMO                   | HMO refers to a Health Maintenance Organization (HMO) characterized by coverage that provides health services for members on a pre-paid basis.                                                                                                                         |
| 4           | Non-U.S. Insurance    | Non-US Insurance refers to individuals who reside in and have health insurance in another country.                                                                                                                                                                     |
| 5           | None/Self Pay         | None/Self Pay refers to individuals with no or limited health insurance; thus, the individual is the payor regardless of ability to pay.                                                                                                                               |

**Field Name:** Government Type-Primary **Seq No:** 3025

**Definition:** Indicate the type of insurance if the patient's primary insurance payor is Government.

**ICD Registry™**  
**Implantable Cardioverter Defibrillators Registry v1.08**  
**Data Dictionary - Definitions Only**

| Selections: | Coding/Sort | Selection(Choose one)                | Explanation |
|-------------|-------------|--------------------------------------|-------------|
|             | 1           | Medicare                             |             |
|             | 2           | Medicaid                             |             |
|             | 3           | TriCare                              |             |
|             | 4           | Veteran's Administration Health Plan |             |
|             | 5           | Federal Employee Insurance           |             |

**Field Name:** Insurance Payor-Secondary

**Seq No:** 3027

**Definition:** Indicate the patient's secondary insurance payor.

| Selections: | Coding/Sort | Selection(Choose one) | Explanation                                                                                                                                                                                                                                                            |
|-------------|-------------|-----------------------|------------------------------------------------------------------------------------------------------------------------------------------------------------------------------------------------------------------------------------------------------------------------|
|             | 1           | Government            | Government refers to patients who are covered by government-reimbursed care. In the U.S. this includes, Medicare, Medicaid, (including all state/federal Medicaid-type programs), TriCare, the Veteran's Administration Health Plan, and Federal Employee's Insurance. |
|             | 2           | Commercial            | Commercial refers to all indemnity (fee-for-service) carriers and Preferred Provider Organizations (PPOs) (e.g. Blue Cross/Blue Shield).                                                                                                                               |
|             | 3           | HMO                   | HMO refers to a Health Maintenance Organization (HMO) characterized by coverage that provides health services for members on a pre-paid basis.                                                                                                                         |
|             | 4           | Non-U.S. Insurance    | Non-US Insurance refers to individuals who reside in and have health insurance in another country.                                                                                                                                                                     |
|             | 5           | None/Self Pay         | None/Self Pay refers to individuals with no or limited health insurance; thus, the individual is the payor regardless of ability to pay.                                                                                                                               |

**Field Name:** Government Type-Secondary

**Seq No:** 3029

**Definition:** Indicate the type of insurance if the patient's secondary insurance payor is Government.

| Selections: | Coding/Sort | Selection(Choose one)                | Explanation |
|-------------|-------------|--------------------------------------|-------------|
|             | 1           | Medicare                             |             |
|             | 2           | Medicaid                             |             |
|             | 3           | TriCare                              |             |
|             | 4           | Veteran's Administration Health Plan |             |
|             | 5           | Federal Employee Insurance           |             |

**Field Name:** Reason for Admission

**Seq No:** 3030

**ICD Registry™**  
**Implantable Cardioverter Defibrillators Registry v1.08**  
**Data Dictionary - Definitions Only**

---

**Definition:** Indicate the primary reason the patient was hospitalized for this admission.

**Selections:**

| Coding/Sort | Selection(Choose one)       | Explanation                                                                       |
|-------------|-----------------------------|-----------------------------------------------------------------------------------|
| 1           | Admitted for this Procedure | Admitted for ICD implantation.                                                    |
| 2           | Cardiac-CHF                 | Admitted for management of heart failure other than implantation of an ICD.       |
| 3           | Cardiac-Other               | Admitted for a cardiac reason other than heart failure or implantation of an ICD. |
| 4           | Non-Cardiac                 | Admitted for a non-cardiac reason other than implantation of an ICD.              |

**Field Name:** Auxiliary 3

**Seq No:** 3040

**Definition:** For participant use only. A 50 character text field that may be used to collect additional information about the patient or admission.

**Selections:**

**Field Name:** Auxiliary 4

**Seq No:** 3050

**Definition:** For participant use only. A 50 character text field that may be used to collect additional information about the patient or admission.

**Selections:**

**ICD Registry™**  
**Implantable Cardioverter Defibrillators Registry v1.08**  
**Data Dictionary - Definitions Only**

**D. History and Risk Factors**

**Field Name:** Syncope

**Seq No:** 3060

**Definition:** Indicate if the patient had a sudden loss of consciousness, including loss of postural tone (not related to anesthesia) with spontaneous recovery as reported by the patient or an observer. Patient may experience syncope when supine.

Note: Patient history is defined as any time prior to the date of implant.

| Selections: | Coding/Sort | Selection(Choose one) | Explanation |
|-------------|-------------|-----------------------|-------------|
|             | 0           | No                    |             |
|             | 1           | Yes                   |             |

**Field Name:** Family Hx Sudden Death

**Seq No:** 3070

**Definition:** Indicate if the patient has a known family history (parent or sibling) of sudden cardiac death.

Sudden cardiac death is defined as a natural death due to cardiac causes heralded by abrupt loss of consciousness, occurring before 75 years of age. The time and mode of death are unexpected even though preexisting heart disease may have been known to be present. Traumatic death subsequently proven to be due to sudden loss of control due to a cardiac problem is included. Coding Exception: If the patient is adopted, or the family history is unavailable, code "No".

Note: Patient history is defined as prior to the current admission.

| Selections: | Coding/Sort | Selection(Choose one) | Explanation |
|-------------|-------------|-----------------------|-------------|
|             | 0           | No                    |             |
|             | 1           | Yes                   |             |

**Field Name:** CHF

**Seq No:** 3080

**Definition:** Indicate if the patient has a history of congestive heart failure (CHF), as documented in the medical record. Besides physician documentation of the CHF history, CHF can also be defined by one of the following:

1. Paroxysmal nocturnal dyspnea (PND);
2. Dyspnea on exertion (DOE) due to heart failure; or
3. Chest X-Ray (CXR) showing pulmonary congestion;
4. Pedal edema or dyspnea treated with medical therapy for heart failure.

Note: Patient history is defined as any time prior to the date of implant.

| Selections: | Coding/Sort | Selection(Choose one) | Explanation |
|-------------|-------------|-----------------------|-------------|
|             | 0           | No                    |             |
|             | 1           | Yes                   |             |

**Field Name:** CHF Duration

**Seq No:** 3090

**Definition:** Indicate the time since the initial CHF diagnosis.

Note: This includes any time prior to date of implant.

**ICD Registry™**  
**Implantable Cardioverter Defibrillators Registry v1.08**  
**Data Dictionary - Definitions Only**

| Selections: | Coding/Sort | Selection(Choose one)    | Explanation |
|-------------|-------------|--------------------------|-------------|
|             | 1           | Within the past 3 months |             |
|             | 2           | 3 to 9 months            |             |
|             | 3           | Greater than 9 months    |             |

**Field Name:** Prior CHF Hospitalization

**Seq No:** 3095

**Definition:** Indicate if the patient has ever been hospitalized for CHF prior to this admission. Indicate the timeframe associated with that hospitalization.

Note: This timeframe does NOT include this admission. The intent of this field is to capture hospitalizations for CHF excluding the current admission.

| Selections: | Coding/Sort | Selection(Choose one)     | Explanation |
|-------------|-------------|---------------------------|-------------|
|             | 0           | Not Hospitalized          |             |
|             | 1           | Yes-Within 6 months       |             |
|             | 2           | Yes-Greater than 6 months |             |

**Field Name:** NYHA Class - Current Status

**Seq No:** 3100

**Definition:** Indicate the patient's New York Heart Association (NYHA) classification.

NOTE: For patients with no symptoms, code "Class 1".

**ICD Registry™**  
**Implantable Cardioverter Defibrillators Registry v1.08**  
**Data Dictionary - Definitions Only**

| Selections: | Coding/Sort | Selection(Choose one) | Explanation                                                                                                                                                                                                                                                                                                               |
|-------------|-------------|-----------------------|---------------------------------------------------------------------------------------------------------------------------------------------------------------------------------------------------------------------------------------------------------------------------------------------------------------------------|
|             | 1           | Class I               | Patient has cardiac disease but without resulting limitations of ordinary physical activity. Ordinary physical activity (e.g., walking several blocks or climbing stairs) does not cause undue fatigue, palpitation, dyspnea, or anginal pain. Limiting symptoms may occur with marked exertion.                          |
|             | 2           | Class II              | Patient has cardiac disease resulting in slight limitation of ordinary physical activity. Patient is comfortable at rest. Ordinary physical activity such as walking more than two blocks or climbing more than one flight of stairs results in limiting symptoms (e.g., fatigue, palpitation, dyspnea, or anginal pain). |
|             | 3           | Class III             | Patient has cardiac disease resulting in marked limitation of physical activity. Patient is comfortable at rest. Less than ordinary physical activity (e.g., walking one to two level blocks or climbing one flight of stairs) causes fatigue, palpitation, dyspnea, or anginal pain.                                     |
|             | 4           | Class IV              | Patient has dyspnea at rest that increases with any physical activity. Patient has cardiac disease resulting in inability to perform any physical activity without discomfort. Symptoms may be present even at rest. If any physical activity is undertaken, discomfort is increased.                                     |

**Field Name:** Cardiac Arrest

**Seq No:** 3110

**Definition:** Indicate if the patient experienced cardiac arrest due to arrhythmia.

Note: Patient history is defined as any time prior to the date of implant.

| Selections: | Coding/Sort | Selection(Choose one) | Explanation |
|-------------|-------------|-----------------------|-------------|
|             | 0           | No Arrest             |             |
|             | 1           | Brady Arrest          |             |
|             | 2           | Tachy Arrest          |             |

**Field Name:** Brady Arrest Reason

**Seq No:** 3111

**Definition:** Indicate the reason(s) for the Brady Arrest.

**ICD Registry™**  
**Implantable Cardioverter Defibrillators Registry v1.08**  
**Data Dictionary - Definitions Only**

| Selections: | Coding/Sort | Selection(Choose multiple)      | Explanation |
|-------------|-------------|---------------------------------|-------------|
|             | 1           | Acute MI                        |             |
|             | 2           | Severe Electrolyte Disturbance  |             |
|             | 3           | Drug Induced Arrhythmia         |             |
|             | 4           | Sinus Node Dysfunction/AV Block |             |
|             | 5           | Unknown Etiology                |             |

**Field Name:** Tachy Arrest Reason

**Seq No:** 3112

**Definition:** Indicate the reason(s) for the Tachy Arrest.

| Selections: | Coding/Sort | Selection(Choose multiple)     | Explanation |
|-------------|-------------|--------------------------------|-------------|
|             | 1           | Acute MI                       |             |
|             | 2           | Severe Electrolyte Disturbance |             |
|             | 3           | Drug Induced Arrhythmia        |             |
|             | 4           | Primary VT/VF                  |             |
|             | 5           | Unknown Etiology               |             |

**Field Name:** Atrial Fibrillation/Atrial Flu

**Seq No:** 3120

**Definition:** Indicate if the patient has a documented history of atrial fibrillation or flutter.

Note: Patient history is defined as any time prior to the date of implant.

| Selections: | Coding/Sort | Selection(Choose one) | Explanation |
|-------------|-------------|-----------------------|-------------|
|             | 0           | No                    |             |
|             | 1           | Yes                   |             |

**Field Name:** Ventricular Tachycardia

**Seq No:** 3130

**Definition:** Indicate if the patient has a history of ventricular tachycardia (either spontaneous or induced) that led to the placement of the ICD. Ventricular tachycardia is defined as a cardiac arrhythmia of 3 or more consecutive complexes in duration emanating from the ventricles at a rate greater than 100 bpm (cycle length less than 600 msec).

Note: Patient history is defined as any time prior to the date of implant.

**ICD Registry™**  
**Implantable Cardioverter Defibrillators Registry v1.08**  
**Data Dictionary - Definitions Only**

| Selections: | Coding/Sort | Selection(Choose one)        | Explanation                                                                                                                                                              |
|-------------|-------------|------------------------------|--------------------------------------------------------------------------------------------------------------------------------------------------------------------------|
|             | 0           | No                           | No history of spontaneous ventricular tachycardia.                                                                                                                       |
|             | 1           | Yes-VT, Non-Sustained        | Three or more consecutive beats of ventricular origin, terminating spontaneously in less than 30 seconds.                                                                |
|             | 2           | Yes-Monomorphic Sustained VT | VT greater than 30 seconds in duration and/or requiring termination due to hemodynamic compromise in less than 30 seconds.                                               |
|             | 3           | Yes-Polymorphic Sustained VT | VT with a constantly changing morphology lasting greater than 30 seconds in duration and/or requiring termination due to hemodynamic compromise in less than 30 seconds. |

**Field Name:** Sinus Node Function

**Seq No:** 3140

**Definition:** Indicate if the patient's sinus node function was normal or abnormal.

Note: Timeframe includes any time prior to the date of implant.

| Selections: | Coding/Sort | Selection(Choose one) | Explanation                                                                    |
|-------------|-------------|-----------------------|--------------------------------------------------------------------------------|
|             | 1           | Normal                |                                                                                |
|             | 2           | Abnormal              | Abnormal - History of any pause longer than 3 seconds OR Tachy/Brady Syndrome. |

**Field Name:** Cardiac Transplant

**Seq No:** 3150

**Definition:** Indicate if the patient had a history of cardiac transplant surgery.

Note: Patient history is defined as any time prior to the date of implant.

| Selections: | Coding/Sort | Selection(Choose one) | Explanation |
|-------------|-------------|-----------------------|-------------|
|             | 0           | No                    |             |
|             | 1           | Yes                   |             |

**Field Name:** Non-Ischemic Dilated Cardiomyopathy

**Seq No:** 3160

**Definition:** Indicate if the patient has a history of non-ischemic dilated cardiomyopathy documented by heart failure and reduced systolic function.

Note: Patient history is defined as any time prior to the date of implant.



**ICD Registry™**  
**Implantable Cardioverter Defibrillators Registry v1.08**  
**Data Dictionary - Definitions Only**

| Selections: | Coding/Sort | Selection(Choose one)        | Explanation |
|-------------|-------------|------------------------------|-------------|
|             | 0           | No                           |             |
|             | 1           | Yes-Within the past 3 months |             |
|             | 2           | Yes-3 to 9 months            |             |
|             | 3           | Yes-Greater than 9 months    |             |

**Field Name:** Ischemic Heart Disease

**Seq No:** 3180

**Definition:** Indicate if the patient shows evidence of ischemic heart disease as documented by any of the following conditions:  
 -At least one major epicardial artery with more than 70% obstruction by coronary angiography.  
 -Other Diagnostic Tests: History of myocardial infarction associated with wall motion abnormality as shown by echocardiography or other cardiac imaging. Stress testing diagnostic of coronary artery disease with or without imaging; ECG with evidence of MI; history of chest pain associated with cardiac enzyme abnormality.

Note:

1. Patient history is defined as any time prior to the date of implant.
2. At least one major epicardial artery with more than 70% obstruction by coronary angiography takes precedence over other diagnostic tests if ischemic heart disease has been documented.

| Selections: | Coding/Sort | Selection(Choose one)                                         | Explanation                                                                                                                                                                                                                                                                                              |
|-------------|-------------|---------------------------------------------------------------|----------------------------------------------------------------------------------------------------------------------------------------------------------------------------------------------------------------------------------------------------------------------------------------------------------|
|             | 0           | No                                                            |                                                                                                                                                                                                                                                                                                          |
|             | 1           | Yes-At Least 1 Epicardial artery greater than 70% Obstruction | At least one epicardial artery greater than 70% obstruction (Angiography).                                                                                                                                                                                                                               |
|             | 2           | Yes-Other Diagnostic Tests                                    | History of myocardial infarction associated with wall motion abnormality as shown by echocardiography or other cardiac imaging. Stress testing diagnostic of coronary artery disease with or without imaging; ECG with evidence of MI; history of chest pain associated with cardiac enzyme abnormality. |

**Field Name:** Previous MI

**Seq No:** 3190

**ICD Registry™**  
**Implantable Cardioverter Defibrillators Registry v1.08**  
**Data Dictionary - Definitions Only**

---

**Definition:** Indicate if the patient had a MI prior to the device implant.

The patient had at least one documented STEMI or NSTEMI. This can be coded based on physician documentation or history noted in the medical record.

Definitions: NON ST ELEVATION MYOCARDIAL INFARCTION (NSTEMI)

The patient was hospitalized for a myocardial infarction documented in the medical record.

AT LEAST ONE OF THE FOLLOWING BIOCHEMICAL INDICATORS for detecting myocardial necrosis must be present (see below for a definition of Reference Control Limits):

1) Troponin T or I:

a) Maximal concentration of troponin T or I > the MI decision limit on at least one occasion during the first 24 hours after the index clinical event.

2) CK-MB:

a) Maximal value of CK-MB > 2 x the upper limit of normal on one occasion during the first hours after the index clinical event. OR

b) Maximal value of CK-MB, preferable CK-MB mass, > upper limit of normal on two successive samples.

3) Total CK:

a) In the absence of availability of a troponin or CK-MB assay, total CK > 2 x the upper limit of normal, or the B fraction of CK may be employed, but these last two biomarkers are considerably less satisfactory than CK-MB.

AND ONE OF THE FOLLOWING:

1) Either ST segment depression or T wave abnormalities; or

2) Ischemic symptoms in the presence or absence of chest discomfort. Ischemic symptoms may include:

a) unexplained nausea and vomiting; or

b) persistent shortness of breath secondary to left ventricular failure; or

c) unexplained weakness, dizziness, lightheadedness, or syncope.

ST ELEVATION MYOCARDIAL INFARCTION (STEMI)

Indicate whether the patient was hospitalized for an ST Elevation Myocardial Infarction (STEMI) documented in the medical record.

AT LEAST ONE OF THE FOLLOWING BIOCHEMICAL INDICATORS for detecting myocardial necrosis must be present (see below for a definition of Reference Control Limits):

1) Troponin T or I:

a) Maximal concentration of troponin T or I > the MI decision limit on at least one occasion during the first 24 hours after the index clinical event.

2) CK-MB:

a) Maximal value of CK-MB > 2 x the upper limit of normal on one occasion during the first hours after the index clinical event; OR

b) Maximal value of CK-MB, preferable CK-MB mass, > upper limit of normal on two successive samples.

3) Total CK

a) In the absence of availability of a troponin or CK-MB assay, total CK > 2 x the upper limit of normal, or the B fraction of CK may be employed, but these last two biomarkers are considerably less satisfactory than CK-MB.

**ICD Registry™**  
**Implantable Cardioverter Defibrillators Registry v1.08**  
**Data Dictionary - Definitions Only**

---

**Definition:**

AND ONE OF THE FOLLOWING ECG CHANGES:

- 1) ST-segment elevation: New or presumed new ST segment elevation at the J point in two or more contiguous leads with the cut-off points  $\geq 0.2$  mV in leads V1, V2, or V3, or  $\geq 0.1$  mV in other leads; OR
- 2) Development of any Q wave in leads V1 through V3, or the development of a Q-wave  $\geq$  or = to 30 ms (0.03s) in leads I, II, aVL, aVF, V4, V5, or V6. (Q wave changes must be present in any two contiguous leads, and be  $\geq$  or = to 1mm in depth.)

Defining Reference Control Values (MI Diagnostic Limit and Upper Limit of Normal):

Reference values must be determined in each laboratory by studies using specific assays with appropriate quality control, as reported in peer-reviewed journals. Acceptable imprecision (coefficient of variation) at the 99th percentile for each assay should be defined as  $\leq$  or = to 10%. Each individual laboratory should confirm the range of reference values in their specific setting.

Note: If more than one MI occurred, code the most recent event.

**Selections:**

| Coding/Sort | Selection(Choose one)                         | Explanation |
|-------------|-----------------------------------------------|-------------|
| 0           | No                                            |             |
| 1           | Yes-Within 40 Days of ICD Implant             |             |
| 2           | Yes-Greater than 40 Days prior to ICD Implant |             |
| 3           | Yes-Both Within 40 days/Greater than 40 days  |             |

**Field Name:** Previous CABG

**Seq No:** 3200

**Definition:** Indicate if the patient had Coronary Bypass Graft Surgery by any approach.

Note: Patient history is defined as any time prior to the current admission. Timeframe does NOT include the current admission. CABGs performed during this admission should be coded within Sequence Number 3590: CABG During this Admission.

**Selections:**

| Coding/Sort | Selection(Choose one) | Explanation |
|-------------|-----------------------|-------------|
| 0           | No                    |             |
| 1           | Yes                   |             |

**Field Name:** Previous CABG Date

**Seq No:** 3210

**Definition:** Indicate the date of the most recent CABG. If month and/or day are not known enter 01.

Note: In the case of multiple CABGs prior to this admission, indicate the most recent.

**Selections:**

**Field Name:** Previous PCI

**Seq No:** 3220

**ICD Registry™**  
**Implantable Cardioverter Defibrillators Registry v1.08**  
**Data Dictionary - Definitions Only**

---

**Definition:** Indicate if the patient had a previous percutaneous coronary intervention (PCI) (even if unsuccessful) of any type (balloon angioplasty, stent or other), performed prior to the current admission.

Note: Timeframe does NOT include the current admission. PCIs performed during this admission should be coded within Sequence Number 3610: PCI During this Admission.

**Selections:**

| Coding/Sort | Selection(Choose one)        | Explanation |
|-------------|------------------------------|-------------|
| 0           | No                           |             |
| 1           | Yes-Within the past 3 months |             |
| 2           | Yes-Greater than 3 months    |             |

**Field Name:** Previous Valvular Surgery **Seq No:** 3230

**Definition:** Indicate if the patient had a previous surgical replacement and/or repair of a cardiac valve, by any approach.

Note: Patient history is defined as any time prior to the date of implant.

**Selections:**

| Coding/Sort | Selection(Choose one) | Explanation |
|-------------|-----------------------|-------------|
| 0           | No                    |             |
| 1           | Yes                   |             |

**Field Name:** Permanent Pacemaker **Seq No:** 3240

**Definition:** Indicate if the patient had a Pacemaker inserted prior to current ICD implant. If yes, indicate the type of pacemaker.

**Selections:**

| Coding/Sort | Selection(Choose one)   | Explanation                           |
|-------------|-------------------------|---------------------------------------|
| 0           | No                      |                                       |
| 1           | Yes-Atrial Chamber      |                                       |
| 2           | Yes-Ventricular Chamber |                                       |
| 3           | Yes-Dual Chamber        | Both atrial and ventricular chambers. |
| 4           | Yes-Biventricular       |                                       |

**Field Name:** Previous ICD **Seq No:** 3250

**Definition:** Indicate if the patient had an ICD Implant procedure prior to this admission.

Note: Timeframe does NOT include the current admission. This device is coded within Sequence Number 3570: ICD Explant Device ID.

**Selections:**

| Coding/Sort | Selection(Choose one) | Explanation |
|-------------|-----------------------|-------------|
| 0           | No                    |             |
| 1           | Yes-Single Chamber    |             |
| 2           | Yes-Dual Chamber      |             |
| 3           | Yes-Biventricular     |             |

**Field Name:** Previous ICD Date **Seq No:** 3260

**ICD Registry™**  
**Implantable Cardioverter Defibrillators Registry v1.08**  
**Data Dictionary - Definitions Only**

---

**Definition:** Indicate the date of the most recent previous ICD implant. If month and/or day are not known, enter 01.

Note: In the case of multiple implants prior to this admission, code the most recent.

**Selections:**

---

**Field Name:** Previous ICD Reason

**Seq No:** 3280

**Definition:** Indicate the previous ICD indication (reason for ICD implant).

**ICD Registry™**  
**Implantable Cardioverter Defibrillators Registry v1.08**  
**Data Dictionary - Definitions Only**

| Selections: | Coding/Sort | Selection(Choose multiple)                   | Explanation                                                                                                                                                                                                                                                                                                       |
|-------------|-------------|----------------------------------------------|-------------------------------------------------------------------------------------------------------------------------------------------------------------------------------------------------------------------------------------------------------------------------------------------------------------------|
|             | 1           | Primary Prevention                           | Primary Prevention was the original indication for patients who were at risk for sudden death but had not suffered from a spontaneous life-threatening ventricular arrhythmia, syncope, or sudden cardiac death.                                                                                                  |
|             | 2           | Syncope with Inducible VT                    | Syncope: Sudden loss of consciousness with loss of postural tone, not related to anesthesia. Inducible VT refers to performance of electrophysiological testing with resulting induction of VT.                                                                                                                   |
|             | 3           | Spontaneous Monomorphic Sustained VT         | VT with a constant morphology greater than 30 seconds in duration and/or requiring termination due to hemodynamic compromise in less than 30 seconds.                                                                                                                                                             |
|             | 4           | Spontaneous Polymorphic Sustained VT         | VT with a constantly changing morphology lasting greater than 30 seconds in duration and/or requiring termination due to hemodynamic compromise in less than 30 seconds.                                                                                                                                          |
|             | 5           | Ventricular Fibrillation                     | Rapid, usually more than 300 bpm (cycle length 180 msec or less), grossly irregular ventricular rhythm with marked variability in cycle length, lack of discernible discrete QRS complex.                                                                                                                         |
|             | 6           | Cardiac Arrest/Arrhythmia - Etiology Unknown | Sudden loss of consciousness requiring cardioversion or defibrillation to restore hemodynamic stability.                                                                                                                                                                                                          |
|             | 7           | Syncope and High Risk Characteristics        | Syncope: Sudden loss of consciousness with loss of postural tone, not related to anesthesia, and High Risk Characteristics specific for non-ischemic dilated cardiomyopathy, or ischemic heart disease with significant ventricular dysfunction, hypertrophic cardiomyopathy, Brugada Syndrome, Long QT Syndrome. |

**ICD Registry™**  
**Implantable Cardioverter Defibrillators Registry v1.08**  
**Data Dictionary - Definitions Only**

|                    |   |      |                                                                                                                                                                                                                                                                                                                                                                                                                                                                                      |
|--------------------|---|------|--------------------------------------------------------------------------------------------------------------------------------------------------------------------------------------------------------------------------------------------------------------------------------------------------------------------------------------------------------------------------------------------------------------------------------------------------------------------------------------|
| <b>Selections:</b> | 8 | AFib | <p>A cardiac arrhythmia arising from the atrium with an atrial rate greater than 300 bpm and an irregular ventricular response in the presence of conduction. AF can be further characterized as:</p> <p>First detected AF</p> <p>Paroxysmal AF: AF is self-terminating within 7 days of recognized onset.</p> <p>Persistent AF: AF is not self-terminating within 7 days, or is terminated electrically or pharmacologically.</p> <p>Chronic AF: AF lasting more than 6 months.</p> |
|--------------------|---|------|--------------------------------------------------------------------------------------------------------------------------------------------------------------------------------------------------------------------------------------------------------------------------------------------------------------------------------------------------------------------------------------------------------------------------------------------------------------------------------------|

**Field Name:** Previous ICD Implant Site **Seq No:** 3290

**Definition:** Indicate the previous ICD implant site.

|                    |                    |                              |                    |
|--------------------|--------------------|------------------------------|--------------------|
| <b>Selections:</b> | <b>Coding/Sort</b> | <b>Selection(Choose one)</b> | <b>Explanation</b> |
|                    | 1                  | Pectoral                     |                    |
|                    | 2                  | Abdominal                    |                    |

**Field Name:** Cerebrovascular Disease **Seq No:** 3310

**Definition:** Indicate if the patient had cerebrovascular disease (CVD) prior to device implant, defined as any one of the following:

- Cerebrovascular Accident (CVA): Patient has a history of stroke, i.e., loss of neurological function with residual symptoms at least 72 hours after onset.
- Reversible Ischemic Neurologic Deficit (RIND): Patient has a history of loss of neurological function with symptoms at least 24 hours after onset but with complete return of function within 72 hours.
- Transient Ischemic Attack (TIA): Patient has a history of loss of neurological function that was abrupt in onset but with complete return of function within 24 hours.
- Non-invasive/invasive carotid test with greater than 75% occlusion.
- Previous carotid artery surgery. This does not include neurological disease processes such as metabolic and/or anoxic ischemic encephalopathy.

Note: Patient history is defined as any time prior to the date of implant.

|                    |                    |                              |                    |
|--------------------|--------------------|------------------------------|--------------------|
| <b>Selections:</b> | <b>Coding/Sort</b> | <b>Selection(Choose one)</b> | <b>Explanation</b> |
|                    | 0                  | No                           |                    |
|                    | 1                  | Yes                          |                    |

**Field Name:** Chronic Lung Disease **Seq No:** 3320

**Definition:** Indicate if the patient has a documented history of chronic lung disease prior to this admission (i.e. chronic obstructive pulmonary disease, emphysema, asthma, chronic bronchitis), or has been or is currently being treated with pharmacologic therapy.

|                    |                    |                              |                    |
|--------------------|--------------------|------------------------------|--------------------|
| <b>Selections:</b> | <b>Coding/Sort</b> | <b>Selection(Choose one)</b> | <b>Explanation</b> |
|                    | 0                  | No                           |                    |
|                    | 1                  | Yes                          |                    |

**ICD Registry™**  
**Implantable Cardioverter Defibrillators Registry v1.08**  
**Data Dictionary - Definitions Only**

---

**Field Name:** Diabetes

**Seq No:** 3330

**Definition:** Indicate if the patient has a history of diabetes, regardless of duration of disease or need for antidiabetic agents. It does not include gestational diabetes.

Note: Patient history is defined as any time prior to the date of implant.

| Selections: | Coding/Sort | Selection(Choose one) | Explanation |
|-------------|-------------|-----------------------|-------------|
|             | 0           | No                    |             |
|             | 1           | Yes                   |             |

**Field Name:** Hypertension

**Seq No:** 3340

**Definition:** Indicate if the patient has a history of hypertension defined as any one of the following:  
 1. History of hypertension diagnosed and treated with medication, diet and/or exercise.  
 2. Blood pressure greater than 140 systolic or 90 diastolic on at least 2 occasions.  
 3. Currently on antihypertensive pharmacologic therapy.

Note: Patient history is defined as any time prior to the date of implant.

| Selections: | Coding/Sort | Selection(Choose one) | Explanation |
|-------------|-------------|-----------------------|-------------|
|             | 0           | No                    |             |
|             | 1           | Yes                   |             |

**Field Name:** Renal Failure-Dialysis

**Seq No:** 3350

**Definition:** Indicate if the patient received or is receiving dialysis as a result of renal failure.

Note: Patient history is defined as any time prior to the date of implant.

| Selections: | Coding/Sort | Selection(Choose one) | Explanation |
|-------------|-------------|-----------------------|-------------|
|             | 0           | No                    |             |
|             | 1           | Yes                   |             |



**ICD Registry™**  
**Implantable Cardioverter Defibrillators Registry v1.08**  
**Data Dictionary - Definitions Only**

**E. Diagnostic Studies**

**Field Name:** Ejection Fraction Assessed

**Seq No:** 3360

**Definition:** Indicate if the patient's ejection fraction was assessed before or during the EP lab visit via invasive (i.e. LV gram) or non-invasive testing (i.e. Echo).

| Selections: | Coding/Sort | Selection(Choose one) | Explanation |
|-------------|-------------|-----------------------|-------------|
|             | 0           | No                    |             |
|             | 1           | Yes                   |             |

**Field Name:** EF %

**Seq No:** 3370

**Definition:** Indicate the lowest Ejection Fraction percent that led to the decision to implant the ICD. The Ejection Fraction percent is the percentage of blood that has emptied from the ventricle at the end of the contraction.

**Selections:**

**Field Name:** EF Timeframe

**Seq No:** 3380

**Definition:** Indicate the timeframe of the Ejection Fraction percent that led to the decision to implant the ICD.

| Selections: | Coding/Sort | Selection(Choose one)  | Explanation                                   |
|-------------|-------------|------------------------|-----------------------------------------------|
|             | 1           | 0 to 1 month           | 0 to 1 month (up to 30 days)                  |
|             | 2           | 1 to 2 months          | 1 to 2 months (31-60 days)                    |
|             | 3           | 2 to 3 months          | 2 to 3 months (61-90 days)                    |
|             | 4           | 3 to 6 months          | 3 to 6 months (91-180 days)                   |
|             | 5           | 6 to 12 months         | 6 to 12 months (181-365 days)                 |
|             | 6           | Greater than 12 months | Greater than 12 months (366 days and greater) |

**Field Name:** Electrophysiology Study Done

**Seq No:** 3390

**Definition:** Indicate if the patient had an EP Study prior to the ICD implant.

| Selections: | Coding/Sort | Selection(Choose one) | Explanation |
|-------------|-------------|-----------------------|-------------|
|             | 0           | No                    |             |
|             | 1           | Yes                   |             |

**Field Name:** EPS Timeframe

**Seq No:** 3400

**Definition:** Indicate the timeframe of the most recent Electrophysiology study.

**ICD Registry™**  
**Implantable Cardioverter Defibrillators Registry v1.08**  
**Data Dictionary - Definitions Only**

| Selections: | Coding/Sort | Selection(Choose one)  | Explanation                                   |
|-------------|-------------|------------------------|-----------------------------------------------|
|             | 1           | 0 to 1 month           | 0 to 1 month (up to 30 days)                  |
|             | 2           | 1 to 2 months          | 1 to 2 months (31-60 days)                    |
|             | 3           | 2 to 3 months          | 2 to 3 months (61-90 days)                    |
|             | 4           | 3 to 6 months          | 3 to 6 months (91-180 days)                   |
|             | 5           | 6 to 12 months         | 6 to 12 months (181-365 days)                 |
|             | 6           | Greater than 12 months | Greater than 12 months (366 days and greater) |

**Field Name:** EPS Findings

**Seq No:** 3410

**Definition:** Indicate the findings associated with the most recent Electrophysiology Study. If "No Arrhythmias Induced" is selected, no other selections may be chosen.

| Selections: | Coding/Sort | Selection(Choose multiple)       | Explanation                                                   |
|-------------|-------------|----------------------------------|---------------------------------------------------------------|
|             | 0           | No Arrhythmias Induced           |                                                               |
|             | 1           | VT Induced                       |                                                               |
|             | 2           | Non-sustained VT                 |                                                               |
|             | 3           | Sustained Monomorphic            |                                                               |
|             | 4           | Sustained Polymorphic            |                                                               |
|             | 5           | Ventricular Flutter Induced      |                                                               |
|             | 6           | Ventricular Fibrillation Induced |                                                               |
|             | 7           | Results Unattainable             | The results of the EP Study could not be obtained or located. |

**Field Name:** QRS Duration

**Seq No:** 3420

**Definition:** Indicate the patient's QRS duration in milliseconds from simultaneous (preferably 3 or more) ECG leads, including I, II, and VI, from the onset to the termination of the QRS.

Note: Indicate the most recent EKG findings prior to the ICD implant.

**Selections:**

**Field Name:** PR Interval Attainable

**Seq No:** 3429

**Definition:** Indicate if the patient's PR Interval was attainable. No should be answered when a patient has Afib, a greater than 1st Degree Heart block or has a Ventricular Paced rhythm.

| Selections: | Coding/Sort | Selection(Choose one) | Explanation |
|-------------|-------------|-----------------------|-------------|
|             | 0           | No                    |             |
|             | 1           | Yes                   |             |

**Field Name:** PR Interval

**Seq No:** 3430

**Definition:** Indicate the patient's longest measured time in milliseconds from onset of P wave to onset of QRS complex in any given ECG lead.

Note: Indicate the most recent EKG findings prior to the ICD implant.

**ICD Registry™**  
**Implantable Cardioverter Defibrillators Registry v1.08**  
**Data Dictionary - Definitions Only**

**Selections:**

**Field Name:** AV Conduction

**Seq No:** 3440

**Definition:** Indicate the patient's Atrioventricular Conduction rhythm.

Note: Indicate the EKG findings leading to the decision to implant the ICD.

| Selections: | Coding/Sort | Selection(Choose one)                              | Explanation |
|-------------|-------------|----------------------------------------------------|-------------|
|             | 1           | Normal                                             |             |
|             | 2           | Abnormal-1st Degree Heart Block Only               |             |
|             | 3           | Abnormal-Heart Block 2nd or 3rd Degree (not paced) |             |
|             | 4           | Paced(any)                                         |             |

**Field Name:** Intraventricular Conduction

**Seq No:** 3450

**Definition:** Indicate the patient's Intraventricular Conduction.

Note: Indicate the EKG findings leading to the decision to implant the ICD.

| Selections: | Coding/Sort | Selection(Choose one)                                   | Explanation |
|-------------|-------------|---------------------------------------------------------|-------------|
|             | 1           | Normal                                                  |             |
|             | 2           | Abnormal-Left Anterior Fascicular Block                 |             |
|             | 3           | Abnormal-Left Posterior Fascicular Block                |             |
|             | 4           | Abnormal-LBBB                                           |             |
|             | 5           | Abnormal-RBBB                                           |             |
|             | 6           | Abnormal-Intraventricular Conduction Delay, Nonspecific |             |
|             | 7           | Paced                                                   |             |
|             | 8           | Abnormal-Bifascicular Block (RBBB Plus LAF)             |             |
|             | 9           | Abnormal-Bifascicular Block (RBBB Plus LPF)             |             |

**Field Name:** Creatinine Level

**Seq No:** 3460

**Definition:** Indicate the patient's most recent preoperative Creatinine level prior to the ICD implant. The creatinine level is measured in mg/dL.

**Selections:**

**Field Name:** BUN Level

**Seq No:** 3470

**Definition:** Indicate the patient's most recent preoperative BUN (Blood Urea Nitrogen) level prior to the ICD implant. The BUN level is measured in mg/dL.

**Selections:**

**Field Name:** Sodium Level

**Seq No:** 3480

**Definition:** Indicate the patient's most recent preoperative Sodium level prior to the ICD implant. The Sodium level is measured in mEq/L.

**ICD Registry™**  
**Implantable Cardioverter Defibrillators Registry v1.08**  
**Data Dictionary - Definitions Only**

---

**Selections:**

**Field Name:** BNP Drawn

**Seq No:** 3485

**Definition:** Indicate if the patient had a preoperative BNP (B-type Natriuretic Peptide) drawn prior to the ICD implant.

**Selections:**

| Coding/Sort | Selection(Choose one) | Explanation |
|-------------|-----------------------|-------------|
| 0           | No                    |             |
| 1           | Yes                   |             |

**Field Name:** BNP Level

**Seq No:** 3490

**Definition:** Indicate the patient's most recent preoperative BNP (B-type Natriuretic Peptide) prior to the ICD implant. The BNP is measured in pg/mL.

**Selections:**

**Field Name:** Systolic BP

**Seq No:** 3500

**Definition:** Indicate the patient's systolic blood pressure on day of implant prior to sedation. Measured in mm-Hg.

**Selections:**

**ICD Registry™**  
**Implantable Cardioverter Defibrillators Registry v1.08**  
**Data Dictionary - Definitions Only**

**F. ICD Procedure(s)**

**Field Name:** ICD Indication

**Seq No:** 3505

**Definition:** Indicate the reason for the first ICD implantation in this patient's lifetime.

**Selections:**

| Coding/Sort | Selection(Choose one) | Explanation                                                                                                                                                                                                                                                                                                                                                                                   |
|-------------|-----------------------|-----------------------------------------------------------------------------------------------------------------------------------------------------------------------------------------------------------------------------------------------------------------------------------------------------------------------------------------------------------------------------------------------|
| 1           | Primary Prevention    | Primary prevention is an indication for patients who are at risk for sudden death but have not yet suffered from a spontaneous life-threatening ventricular arrhythmia, syncope, or sudden cardiac death. (This includes patients who have never experienced syncope or cardiac arrest but have inducible ventricular tachycardia during electrophysiologic testing for risk stratification.) |
| 2           | Secondary Prevention  | Secondary prevention is an indication for patients who have already experienced a spontaneous life-threatening ventricular arrhythmia, a cardiac arrest, or unexplained syncope with workup suggesting a high probability that a ventricular tachyarrhythmia was the cause of the syncope.                                                                                                    |

**Field Name:** Reason(s) for Re-implantation

**Seq No:** 3506

**Definition:** Indicate the reason(s) why device was re-implanted.

Note: Applicable only if Sequence Number 3250: Previous ICD, is "Yes".

**ICD Registry™**  
**Implantable Cardioverter Defibrillators Registry v1.08**  
**Data Dictionary - Definitions Only**

| Selections: | Coding/Sort | Selection(Choose multiple)                  | Explanation                                                                                                                                                                                                    |
|-------------|-------------|---------------------------------------------|----------------------------------------------------------------------------------------------------------------------------------------------------------------------------------------------------------------|
|             | 1           | End of Battery Life                         | The manufacturer's designation that the pulse generator battery has reached the end of its service life.                                                                                                       |
|             | 2           | Device Upgrade                              | Replacement of a pulse generator with a model with additional pacing capabilities such as an upgrade from a single to a dual chamber device, or the replacement of a non-CRT device with a CRT device.         |
|             | 3           | Device Infection                            | Replacement of a device because of an infection involving a previously implanted device                                                                                                                        |
|             | 4           | Device Malfunction                          | Device performance outside manufacturer's designated specification that cannot be resolved with reprogramming, necessitating in the replacement of the device, in the physician's opinion.                     |
|             | 5           | Device Under Manufacturer Advisory/Recalled | A device model recognized by the manufacturer as demonstrating a recurring performance failure resulting in an advisory letter to physicians. This may or may not reach the level of an FDA designated recall. |

**Field Name:** Mult ICDs implanted during admit

**Seq No:** 3507

**Definition:** Indicate if multiple ICD devices were implanted during the current admission.

Note: This field is meant to capture whether an ICD was implanted AND explanted during the current admission. Code "No" if the patient had only one implant during the current admission.

| Selections: | Coding/Sort | Selection(Choose one) | Explanation |
|-------------|-------------|-----------------------|-------------|
|             | 0           | No                    |             |
|             | 1           | Yes                   |             |

**Field Name:** Reason for Device Repl during admit

**Seq No:** 3508

**Definition:** Indicate the reason(s) for multiple implants during the current admission.

Note: Applicable only if Sequence Number 3507: Multiple ICDs implated during this admission, is "Yes".

**ICD Registry™**  
**Implantable Cardioverter Defibrillators Registry v1.08**  
**Data Dictionary - Definitions Only**

| Selections: | Coding/Sort | Selection(Choose multiple)                  | Explanation                                                                                                                                                                                                    |
|-------------|-------------|---------------------------------------------|----------------------------------------------------------------------------------------------------------------------------------------------------------------------------------------------------------------|
|             | 1           | Device Upgrade                              | Replacement of a pulse generator with a model with additional pacing capabilities such as an upgrade from a single to a dual chamber device, or the replacement of a non-CRT device with a CRT device.         |
|             | 2           | Device Infection                            | Replacement of a device because of an infection involving a previously implanted device                                                                                                                        |
|             | 3           | Device Malfunction                          | Device performance outside manufacturer's designated specification that cannot be resolved with reprogramming, necessitating in the replacement of the device, in the physician's opinion.                     |
|             | 4           | Device Under Manufacturer Advisory/Recalled | A device model recognized by the manufacturer as demonstrating a recurring performance failure resulting in an advisory letter to physicians. This may or may not reach the level of an FDA designated recall. |

**Field Name:** Implant Operator UPIN

**Seq No:** 3510

**Definition:** Indicate the implanting physician's (U)nique (P)hysician (I)dentification (N)umber. UPINs, assigned by CMS, are used to uniquely identify physicians for Medicare billing purposes and may contain any letter or number character combination. The UPIN should be specified for the physician implanting the device, not the physician placing the leads. Implanting physician is determined by the individual institution.

**Selections:**

**Field Name:** Implant Operator NPI

**Seq No:** 3515

**Definition:** Indicate the physician's (N)ational (P)rovider (I)dentifier. NPIs, assigned by CMS, are used to uniquely identify physicians for Medicare billing purposes. The NPI should be specified for the physician implanting the device, not the physician placing the leads.

**Selections:**

**Field Name:** Implant Operator First Name

**Seq No:** 3520

**Definition:** Indicate the implant operator's first name.

**Selections:**

**Field Name:** Implant Operator Middle Name

**Seq No:** 3525

**Definition:** Indicate the implant operator's middle name or middle initial.

**Selections:**

**Field Name:** Implant Operator Last Name

**Seq No:** 3530

**Definition:** Indicate the implant operator's last name.

**ICD Registry™**  
**Implantable Cardioverter Defibrillators Registry v1.08**  
**Data Dictionary - Definitions Only**

---

**Selections:**

**Field Name:** ICD Type **Seq No:** 3540

**Definition:** Indicate the type of ICD implanted.

| Selections: | Coding/Sort | Selection(Choose one) | Explanation |
|-------------|-------------|-----------------------|-------------|
|             | 1           | Single Chamber        |             |
|             | 2           | Dual Chamber          |             |
|             | 3           | Biventricular         |             |

**Field Name:** LV Lead Implantation Method **Seq No:** 3550

**Definition:** Indicate the method for implanting the LV lead.

| Selections: | Coding/Sort | Selection(Choose one) | Explanation |
|-------------|-------------|-----------------------|-------------|
|             | 1           | Coronary Sinus        |             |
|             | 2           | Epicardial Lead       |             |
|             | 3           | Other                 |             |

**Field Name:** ICD Manufacturer **Seq No:** 3560

**Definition:** Indicate the manufacturer of the implanted or explanted ICD.

**Selections:**

**Field Name:** ICD Model Name **Seq No:** 3561

**Definition:** Indicate the model name of the implanted or explanted ICD.

**Selections:**

**Field Name:** ICD Model Number **Seq No:** 3562

**Definition:** Indicate the model number of the implanted or explanted ICD.

**Selections:**

**Field Name:** ICD Implant Device ID **Seq No:** 3565

**Definition:** Indicate the unique ACC assigned identification number associated with the implanted device. The ACC will assign a unique identification number for each unique ICD device manufacturer, model and model number. The list of ICDs will be maintained by the ACC and added to the data entry tool as each new device receives FDA approval. Third party software vendors certified by the ACC will be required to download and import the ICD master list so that newly approved devices can be specified and submitted to the ACC. Only one ICD Implant Device can be specified. Note: In the event of multiple implantations, code the final/last device implanted during the current admission.

**Selections:**

**Field Name:** ICD Implant Serial Number **Seq No:** 3566

**Definition:** Indicate the ICD Device Serial Number associated with the implanted device.

**Selections:**



**ICD Registry™**  
**Implantable Cardioverter Defibrillators Registry v1.08**  
**Data Dictionary - Definitions Only**

---

**Field Name:** ICD Explant Device ID

**Seq No:** 3570

**Definition:** Indicate the unique ACC assigned identification number associated with the explanted device. The ACC will assign a unique identification number for each unique ICD device manufacturer, model and model number. The list of ICDs will be maintained by the ACC and added to the data entry tool as each new device receives FDA approval. Third party software vendors certified by the ACC will be required to download and import the ICD master list so that newly approved devices can be specified and submitted to the ACC. Only one ICD Explant Device can be specified.

Note(1): Applicable only if Sequence Number 3250: Previous ICD, is "Yes". The intent of this field is to record the device in the patient at the time of admission for the current hospital stay.

Note(2): This field is NOT to be used in the event of multiple implantations (Sequence Number 3507: Multiple ICDs implanted during this admission, is "Yes").

**Selections:**

---

**Field Name:** ICD Explant Serial Number

**Seq No:** 3571

**Definition:** Indicate the ICD Device Serial Number associated with the explanted device.

**Selections:**

---

**ICD Registry™**  
**Implantable Cardioverter Defibrillators Registry v1.08**  
**Data Dictionary - Definitions Only**

**G. Adverse Events**

**Field Name:** Available Adverse Events

**Seq No:** 3575

**Definition:** Indicate the Adverse Events that were downloaded from the ACC website and imported into the ICD data collection tool. This element will be used to determine if the participant has the right adverse events in the ICD data collection tool for every admission.

**Selections:**

**Field Name:** Adverse Events Exist

**Seq No:** 3580

**Definition:** Indicate if the patient had any adverse events during or after the EP lab visit up until discharge. If "Yes" then complete the Adverse Events section.

**Selections:**

| Coding/Sort | Selection(Choose one) | Explanation |
|-------------|-----------------------|-------------|
| 0           | No                    |             |
| 1           | Yes                   |             |

**Field Name:** Adverse Event

**Seq No:** 3581

**Definition:** Indicate the Adverse Event that occurred during or after the EP lab visit up until discharge. The same adverse event can be repeated with a different adverse event date.

Note: The initial set of Adverse Events that should be collected are documented in Appendix A of the data dictionary. These Adverse Events may be updated periodically by the ACC. When the Adverse Events have been updated, participants utilizing non-ACC software will be instructed to download and import the latest version of Adverse Event file into their data collection tool.

**Selections:**

**Field Name:** Adverse Event Date

**Seq No:** 3583

**Definition:** Indicate the date that the Adverse Event occurred.

**Selections:**

**ICD Registry™**  
**Implantable Cardioverter Defibrillators Registry v1.08**  
**Data Dictionary - Definitions Only**

**H. Discharge**

**Field Name:** CABG During This Admission **Seq No:** 3590

**Definition:** Indicate if the patient had a CABG (Coronary Artery Bypass Graft Surgery) during the current admission.

Note: If multiple CABGs are performed during this admission, code the date of the CABG performed closest to the date of implant.

**Selections:**

| Coding/Sort | Selection(Choose one) | Explanation |
|-------------|-----------------------|-------------|
| 0           | No                    |             |
| 1           | Yes                   |             |

**Field Name:** CABG Date **Seq No:** 3600

**Definition:** Indicate the date Coronary Artery Bypass Graft (CABG) Surgery was performed during the current admission.

**Selections:**

**Field Name:** PCI During This Admission **Seq No:** 3610

**Definition:** Indicate if the patient had a PCI during this admission.

Note: If multiple PCIs are performed during this admission, code the date of the PCI performed closest to the date of implant.

**Selections:**

| Coding/Sort | Selection(Choose one) | Explanation |
|-------------|-----------------------|-------------|
| 0           | No                    |             |
| 1           | Yes                   |             |

**Field Name:** PCI Date **Seq No:** 3620

**Definition:** Indicate the date PCI was performed during the current admission.

**Selections:**

**Field Name:** Vital Status **Seq No:** 3630

**Definition:** Indicate if the patient expired during the hospital stay. If "Yes," indicate the cause of death.

**Selections:**

| Coding/Sort | Selection(Choose one)      | Explanation |
|-------------|----------------------------|-------------|
| 1           | Alive                      |             |
| 2           | Deceased-Cardiac Death     |             |
| 3           | Deceased-Non-Cardiac Death |             |

**Field Name:** Date of Death This Admit **Seq No:** 3640

**Definition:** Indicate the date the patient expired during this hospitalization.

**Selections:**

**Field Name:** Death in Lab **Seq No:** 3645

**ICD Registry™**  
**Implantable Cardioverter Defibrillators Registry v1.08**  
**Data Dictionary - Definitions Only**

---

**Definition:** Indicate if the patient's death occurred in the lab where the device was implanted

**Selections:**

| Coding/Sort | Selection(Choose one) | Explanation |
|-------------|-----------------------|-------------|
| 0           | No                    |             |
| 1           | Yes                   |             |

---

**Field Name:** Date of Discharge

**Seq No:** 3650

**Definition:** Indicate the patient's date of discharge.

**Selections:**

---

**ICD Registry™**  
**Implantable Cardioverter Defibrillators Registry v1.08**  
**Data Dictionary - Definitions Only**

---

**I. Discharge Medications**

---

**Field Name:** Discharge Medication

**Seq No:** 3660

**Definition:** Indicates the discharge medication.

Note: The initial set of discharge medications that should be collected are documented in Appendix B of the data dictionary. These medications may be updated periodically by the ACC. When the discharge medications have been updated, participants utilizing non-ACC software will be instructed to download and import the latest version of medication file into their data collection tool.

**Selections:**

---

**Field Name:** Discharge Medication Prescribed

**Seq No:** 3665

**Definition:** Indicate if discharge medication was prescribed, not prescribed, contraindicated or blinded.

Note: "Blinded" should be specified if the patient was in a research study and the prescribing of this specific medication is unknown.

**Selections:**

| <b>Coding/Sort</b> | <b>Selection(Choose one)</b> | <b>Explanation</b> |
|--------------------|------------------------------|--------------------|
| 0                  | No                           |                    |
| 1                  | Yes                          |                    |
| 2                  | Contraindicated              |                    |
| 3                  | Blinded                      |                    |

**Appendix A - Adverse Events**  
**ICD Registry™**  
**Implantable Cardioverter Defibrillators Registry v1.08**

---

**Adverse Events**

---

**Field Name:** Cardiac Arrest

**Adverse Event Seq No:** ae001

**Adverse Event ID:** 1

**Effective Date:** 01/01/2004

**Expiration Date:**

**Definition:** Indicate if the patient experienced a cardiac arrest as documented by sudden cessation of cardiac activity so that the patient became unresponsive, with no normal breathing and no signs of circulation.

---

**Field Name:** Drug Reaction

**Adverse Event Seq No:** ae002

**Adverse Event ID:** 2

**Effective Date:** 01/01/2004

**Expiration Date:**

**Definition:** Indicate if the patient experienced a drug reaction as documented by anaphylaxis, rash, etc.

---

**Field Name:** Cardiac Perforation

**Adverse Event Seq No:** ae003

**Adverse Event ID:** 3

**Effective Date:** 01/01/2004

**Expiration Date:**

**Definition:** Indicate if the patient experienced a cardiac perforation as documented by migration of pacing or defibrillator lead to epicardial surface, resulting in pain, pericardial effusion, failure to capture, capture of diaphragm, phrenic nerve, or intercostals muscle of sufficient magnitude to require repositioning.

---

**Field Name:** Cardiac Valve Injury

**Adverse Event Seq No:** ae004

**Adverse Event ID:** 4

**Effective Date:** 01/01/2004

**Expiration Date:**

**Definition:** Indicate if the patient experienced a cardiac valve injury as documented by manipulation of pacing or defibrillating leads that may tear a valve leaflet or chordae tendinae (usually manifests as a new regurgitant murmur appearing after the procedure).

---

**Field Name:** Conduction Block

**Adverse Event Seq No:** ae005

**Adverse Event ID:** 5

**Effective Date:** 01/01/2004

**Expiration Date:**

**Definition:** Indicate if the patient experienced a conduction block as documented by manipulation of pacing or defibrillating leads that may injure parts of the specialized cardiac conducting system. (Usually manifest as a new RBBB or new onset of complete heart block in a person with preexisting LBBB).

---

**Field Name:** Coronary Venous Dissection

**Adverse Event Seq No:** ae006

**Adverse Event ID:** 6

**Effective Date:** 01/01/2004

**Expiration Date:**

**Appendix A - Adverse Events**  
**ICD Registry™**  
**Implantable Cardioverter Defibrillators Registry v1.08**

---

**Definition:** Indicate if the patient experienced a coronary venous dissection as documented by manipulation of pacing or defibrillating leads in the coronary sinus (CS) may result in a tear of the CS endothelium, with dissection into the CS wall. This may occasionally result in perforation of the CS.

---

**Field Name:** Hematoma **Adverse Event Seq No:** ae007

**Adverse Event ID:** 7

**Effective Date:** 01/01/2004 **Expiration Date:**

**Definition:** Indicate if the patient experienced hematoma resulting in reoperation or transfusion.

---

**Field Name:** Lead Dislodgement **Adverse Event Seq No:** ae008

**Adverse Event ID:** 8

**Effective Date:** 01/01/2004 **Expiration Date:**

**Definition:** Indicate if the patient experienced a lead dislodgement as documented by movement of lead sufficient to require repositioning.

---

**Field Name:** Hemothorax **Adverse Event Seq No:** ae009

**Adverse Event ID:** 9

**Effective Date:** 01/01/2004 **Expiration Date:**

**Definition:** Indicate if the patient experienced a hemothorax as documented by accumulation of blood in thorax.

---

**Field Name:** Pneumothorax **Adverse Event Seq No:** ae010

**Adverse Event ID:** 10

**Effective Date:** 01/01/2004 **Expiration Date:**

**Definition:** Indicate if the patient experienced a pneumothorax as documented by air in thorax sufficient to require chest tube.

---

**Field Name:** Peripheral Nerve Injury **Adverse Event Seq No:** ae011

**Adverse Event ID:** 11

**Effective Date:** 01/01/2004 **Expiration Date:**

**Definition:** Indicate if the patient experienced peripheral nerve injury as documented by sensory or motor loss of peripheral nerve function. This may result from external nerve compression as a result of positioning during an implantation procedure, internal compression (e.g. secondary to hematoma formation) or direct nerve.

---

**Field Name:** Peripheral Embolus **Adverse Event Seq No:** ae012

**Adverse Event ID:** 12

**Effective Date:** 01/01/2004 **Expiration Date:**

**Definition:** Indicate if the patient experienced a peripheral embolus as documented by acute occlusion of an artery resulting from embolization of a cardiac or proximal arterial thrombus.

---

**Field Name:** Phlebitis - Superficial **Adverse Event Seq No:** ae013

---

**Appendix A - Adverse Events**  
**ICD Registry™**  
**Implantable Cardioverter Defibrillators Registry v1.08**

---

**Adverse Event ID: 13**

**Effective Date:** 01/01/2004

**Expiration Date:**

**Definition:** Indicate if the patient experienced superficial phlebitis as documented by signs of superficial venous inflammation, such as local erythema, tenderness or swelling.

---

**Field Name:** Phlebitis - Deep

**Adverse Event Seq No:** ae014

**Adverse Event ID: 14**

**Effective Date:** 01/01/2004

**Expiration Date:**

**Definition:** Indicate if the patient experienced deep phlebitis as documented by occlusion of deep vein resulting in extremity swelling, plus or minus signs of inflammation.

---

**Field Name:** TIA

**Adverse Event Seq No:** ae015

**Adverse Event ID: 15**

**Effective Date:** 01/01/2004

**Expiration Date:**

**Definition:** Indicate if the patient experienced a TIA as documented by loss of neurological function that was abrupt in onset but with complete return of function within 24 hours.

---

**Field Name:** CVA/Stroke

**Adverse Event Seq No:** ae016

**Adverse Event ID: 16**

**Effective Date:** 01/01/2004

**Expiration Date:**

**Definition:** Indicate if the patient experienced a cerebrovascular accident (CVA) as documented by a central neurological deficit persisting for > 72 hours.

---

**Field Name:** MI

**Adverse Event Seq No:** ae017

**Adverse Event ID: 17**

**Effective Date:** 01/01/2004

**Expiration Date:**



## Appendix A - Adverse Events

### ICD Registry™

#### Implantable Cardioverter Defibrillators Registry v1.08

---

**Definition:** Indicate if the patient experienced an MI during the EP lab visit or after lab visit until discharge (or before any subsequent lab visits) as documented by:  
Definitions: NON ST ELEVATION MYOCARDIAL INFARCTION (NSTEMI)  
The patient was hospitalized for a myocardial infarction documented in the medical record.  
AT LEAST ONE OF THE FOLLOWING BIOCHEMICAL INDICATORS for detecting myocardial necrosis must be present (see below for a definition of Reference Control Limits):

1) Troponin T or I:

a) Maximal concentration of troponin T or I > the MI decision limit on at least one occasion during the first 24 hours after the index clinical event.

2) CK-MB:

a) Maximal value of CK-MB > 2 x the upper limit of normal on one occasion during the first hours after the index clinical event. OR

b) Maximal value of CK-MB, preferable CK-MB mass, > upper limit of normal on two successive samples.

3) Total CK:

a) In the absence of availability of a troponin or CK-MB assay, total CK > 2 x the upper limit of normal, or the B fraction of CK may be employed, but these last two biomarkers are considerably less satisfactory than CK-MB.

AND ONE OF THE FOLLOWING:

1) Either ST segment depression or T wave abnormalities; or

2) Ischemic symptoms in the presence or absence of chest discomfort. Ischemic symptoms may include:

a) unexplained nausea and vomiting; or

b) persistent shortness of breath secondary to left ventricular failure; or

c) unexplained weakness, dizziness, lightheadedness, or syncope.

ST ELEVATION MYOCARDIAL INFARCTION (STEMI)

Indicate whether the patient was hospitalized for an ST Elevation Myocardial Infarction (STEMI) documented in the medical record.

AT LEAST ONE OF THE FOLLOWING BIOCHEMICAL INDICATORS for detecting myocardial necrosis must be present (see below for a definition of Reference Control Limits):

1) Troponin T or I:

a) Maximal concentration of troponin T or I > the MI decision limit on at least one occasion during the first 24 hours after the index clinical event.

2) CK-MB:

a) Maximal value of CK-MB > 2 x the upper limit of normal on one occasion during the first hours after the index clinical event; OR

b) Maximal value of CK-MB, preferable CK-MB mass, > upper limit of normal on two successive samples.

3) Total CK

a) In the absence of availability of a troponin or CK-MB assay, total CK > 2 x the upper limit of normal, or the B fraction of CK may be employed, but these last two biomarkers are considerably less satisfactory than CK-MB.

AND ONE OF THE FOLLOWING ECG CHANGES:

1) ST-segment elevation: New or presumed new ST segment elevation at the J point in two or more contiguous leads with the cut-off points  $\geq 0.2$  mV in leads V1, V2, or V3, or  $\geq 0.1$  mV in other leads; OR

2) Development of any Q wave in leads V1 through V3, or the development of a Q-wave  $>$  or  $=$  to 30 ms (0.03s) in leads I, II, aVL, aVF, V4, V5, or V6. (Q wave changes must be present in any two contiguous leads, and be  $>$  or  $=$  to 1mm in depth.)

Defining Reference Control Values (MI Diagnostic Limit and Upper Limit of Normal):

---

**Appendix A - Adverse Events**  
**ICD Registry™**  
**Implantable Cardioverter Defibrillators Registry v1.08**

---

**Definition:** Reference values must be determined in each laboratory by studies using specific assays with appropriate quality control, as reported in peer-reviewed journals. Acceptable imprecision (coefficient of variation) at the 99th percentile for each assay should be defined as < or = to 10%. Each individual laboratory should confirm the range of reference values in their specific setting.

---

**Field Name:** Pericardial Tamponade

**Adverse Event Seq No:** ae018

**Adverse Event ID:** 18

**Effective Date:** 01/01/2004

**Expiration Date:**

**Definition:** Indicate if the patient experienced fluid in the pericardial space compromising cardiac filling, and requiring intervention as documented by either: 1) Echo showing pericardial fluid and signs of tamponade such as right heart compromise, or 2) Systemic hypotension due to pericardial fluid compromising cardiac function.

---

**Field Name:** AV Fistula

**Adverse Event Seq No:** ae019

**Adverse Event ID:** 19

**Effective Date:** 01/01/2004

**Expiration Date:**

**Definition:** Indicate if the patient experienced an AV fistula as documented by a connection between the access artery and the accompanying vein that is demonstrated by arteriography or ultrasound and most often characterized by a continuous bruit.

---

**Field Name:** Infection Related to Device

**Adverse Event Seq No:** ae020

**Adverse Event ID:** 20

**Effective Date:** 01/01/2004

**Expiration Date:**

**Definition:** Indicate if the patient experienced an infection related to the device.

---

**Appendix B - Medications**  
**ICD Registry™**  
**Implantable Cardioverter Defibrillators Registry v1.08**

**Medications**

---

|                                        |                                |
|----------------------------------------|--------------------------------|
| <b>Field Name:</b> ACE-Inhibitor (any) | <b>Medication Seq No:</b> m001 |
| <b>Category:</b> Ace Inhibitor         | <b>Medication ID:</b> 1        |
| <b>Effective Date:</b> 01/01/2004      | <b>Expiration Date:</b>        |

---

|                                       |                                |
|---------------------------------------|--------------------------------|
| <b>Field Name:</b> Amiodarone         | <b>Medication Seq No:</b> m002 |
| <b>Category:</b> Antiarrhythmic Agent | <b>Medication ID:</b> 2        |
| <b>Effective Date:</b> 01/01/2004     | <b>Expiration Date:</b>        |

---

|                                       |                                |
|---------------------------------------|--------------------------------|
| <b>Field Name:</b> Disopyramide       | <b>Medication Seq No:</b> m003 |
| <b>Category:</b> Antiarrhythmic Agent | <b>Medication ID:</b> 3        |
| <b>Effective Date:</b> 01/01/2004     | <b>Expiration Date:</b>        |

---

|                                       |                                |
|---------------------------------------|--------------------------------|
| <b>Field Name:</b> Dofetilide         | <b>Medication Seq No:</b> m004 |
| <b>Category:</b> Antiarrhythmic Agent | <b>Medication ID:</b> 4        |
| <b>Effective Date:</b> 01/01/2004     | <b>Expiration Date:</b>        |

---

|                                       |                                |
|---------------------------------------|--------------------------------|
| <b>Field Name:</b> Flecainide         | <b>Medication Seq No:</b> m005 |
| <b>Category:</b> Antiarrhythmic Agent | <b>Medication ID:</b> 5        |
| <b>Effective Date:</b> 01/01/2004     | <b>Expiration Date:</b>        |

---

|                                       |                                |
|---------------------------------------|--------------------------------|
| <b>Field Name:</b> Mexiletine         | <b>Medication Seq No:</b> m006 |
| <b>Category:</b> Antiarrhythmic Agent | <b>Medication ID:</b> 6        |
| <b>Effective Date:</b> 01/01/2004     | <b>Expiration Date:</b>        |

---

|                                       |                                |
|---------------------------------------|--------------------------------|
| <b>Field Name:</b> Procainamide       | <b>Medication Seq No:</b> m007 |
| <b>Category:</b> Antiarrhythmic Agent | <b>Medication ID:</b> 7        |
| <b>Effective Date:</b> 01/01/2004     | <b>Expiration Date:</b>        |

---

|                                       |                                |
|---------------------------------------|--------------------------------|
| <b>Field Name:</b> Propafenone        | <b>Medication Seq No:</b> m008 |
| <b>Category:</b> Antiarrhythmic Agent | <b>Medication ID:</b> 8        |
| <b>Effective Date:</b> 01/01/2004     | <b>Expiration Date:</b>        |

---

|                                       |                                |
|---------------------------------------|--------------------------------|
| <b>Field Name:</b> Quinidine          | <b>Medication Seq No:</b> m009 |
| <b>Category:</b> Antiarrhythmic Agent | <b>Medication ID:</b> 9        |
| <b>Effective Date:</b> 01/01/2004     | <b>Expiration Date:</b>        |

---

**Appendix B - Medications**  
**ICD Registry™**  
**Implantable Cardioverter Defibrillators Registry v1.08**

---

|                                       |                                |
|---------------------------------------|--------------------------------|
| <b>Field Name:</b> Sotalol            | <b>Medication Seq No:</b> m010 |
| <b>Category:</b> Antiarrhythmic Agent | <b>Medication ID:</b> 10       |
| <b>Effective Date:</b> 01/01/2004     | <b>Expiration Date:</b>        |

---

|                                       |                                |
|---------------------------------------|--------------------------------|
| <b>Field Name:</b> Other Anti. Arrhy. | <b>Medication Seq No:</b> m011 |
| <b>Category:</b> Antiarrhythmic Agent | <b>Medication ID:</b> 11       |
| <b>Effective Date:</b> 01/01/2004     | <b>Expiration Date:</b>        |

---

|                                   |                                |
|-----------------------------------|--------------------------------|
| <b>Field Name:</b> Hydralazine    | <b>Medication Seq No:</b> m012 |
| <b>Category:</b> Antihypertensive | <b>Medication ID:</b> 12       |
| <b>Effective Date:</b> 01/01/2004 | <b>Expiration Date:</b>        |

---

|                                   |                                |
|-----------------------------------|--------------------------------|
| <b>Field Name:</b> ARB (any)      | <b>Medication Seq No:</b> m013 |
| <b>Category:</b> ARB              | <b>Medication ID:</b> 13       |
| <b>Effective Date:</b> 01/01/2004 | <b>Expiration Date:</b>        |

---

|                                   |                                |
|-----------------------------------|--------------------------------|
| <b>Field Name:</b> ASA            | <b>Medication Seq No:</b> m014 |
| <b>Category:</b> ASA              | <b>Medication ID:</b> 14       |
| <b>Effective Date:</b> 01/01/2004 | <b>Expiration Date:</b>        |

---

|                                       |                                |
|---------------------------------------|--------------------------------|
| <b>Field Name:</b> Beta-Blocker (any) | <b>Medication Seq No:</b> m015 |
| <b>Category:</b> Beta Blocker         | <b>Medication ID:</b> 15       |
| <b>Effective Date:</b> 01/01/2004     | <b>Expiration Date:</b>        |

---

|                                          |                                |
|------------------------------------------|--------------------------------|
| <b>Field Name:</b> Diltiazem             | <b>Medication Seq No:</b> m016 |
| <b>Category:</b> Calcium Channel Blocker | <b>Medication ID:</b> 16       |
| <b>Effective Date:</b> 01/01/2004        | <b>Expiration Date:</b>        |

---

|                                          |                                |
|------------------------------------------|--------------------------------|
| <b>Field Name:</b> Verapamil             | <b>Medication Seq No:</b> m017 |
| <b>Category:</b> Calcium Channel Blocker | <b>Medication ID:</b> 17       |
| <b>Effective Date:</b> 01/01/2004        | <b>Expiration Date:</b>        |

---

|                                          |                                |
|------------------------------------------|--------------------------------|
| <b>Field Name:</b> Other CCB             | <b>Medication Seq No:</b> m018 |
| <b>Category:</b> Calcium Channel Blocker | <b>Medication ID:</b> 18       |
| <b>Effective Date:</b> 01/01/2004        | <b>Expiration Date:</b>        |

---

|                             |                                |
|-----------------------------|--------------------------------|
| <b>Field Name:</b> Coumadin | <b>Medication Seq No:</b> m019 |
| <b>Category:</b> Coumadin   | <b>Medication ID:</b> 19       |

---

**Appendix B - Medications**  
**ICD Registry™**  
**Implantable Cardioverter Defibrillators Registry v1.08**

---

**Effective Date:** 01/01/2004

**Expiration Date:**

**Field Name:** Digoxin

**Medication Seq No:** m020

**Category:** Digoxin

**Medication ID:** 20

**Effective Date:** 01/01/2004

**Expiration Date:**

**Field Name:** Diuretic (any)

**Medication Seq No:** m021

**Category:** Diuretic

**Medication ID:** 21

**Effective Date:** 01/01/2004

**Expiration Date:**

**Field Name:** Nitroglycerin SL, PRN

**Medication Seq No:** m022

**Category:** Nitrate

**Medication ID:** 22

**Effective Date:** 01/01/2004

**Expiration Date:**

**Field Name:** Nitroglycerin Long Acting

**Medication Seq No:** m023

**Category:** Nitrate

**Medication ID:** 23

**Effective Date:** 01/01/2004

**Expiration Date:**

**Field Name:** Clopidogrel

**Medication Seq No:** m024

**Category:** Platelet Aggregation Inhibitor

**Medication ID:** 24

**Effective Date:** 01/01/2004

**Expiration Date:**

**Field Name:** Ticlopidine

**Medication Seq No:** m025

**Category:** Platelet Aggregation Inhibitor

**Medication ID:** 25

**Effective Date:** 01/01/2004

**Expiration Date:**

**Field Name:** Statin (any)

**Medication Seq No:** m026

**Category:** Statin

**Medication ID:** 26

**Effective Date:** 01/01/2004

**Expiration Date:**

**Masoudi FA et al.**

**Appendix C: Data Dictionary for HMORN VDW**

## HMORN VDW Data Elements

### Demographics

| Variable                | Description                                                                       | Type   | Coding                                                                                                                                                                                                                                                                                                                                                                                                                                                                                                                                                                                                                                                                                                                                                                                  |
|-------------------------|-----------------------------------------------------------------------------------|--------|-----------------------------------------------------------------------------------------------------------------------------------------------------------------------------------------------------------------------------------------------------------------------------------------------------------------------------------------------------------------------------------------------------------------------------------------------------------------------------------------------------------------------------------------------------------------------------------------------------------------------------------------------------------------------------------------------------------------------------------------------------------------------------------------|
| Studyid                 | Person-level identifier created at each study site for the purpose of this study. | Num 4  |                                                                                                                                                                                                                                                                                                                                                                                                                                                                                                                                                                                                                                                                                                                                                                                         |
| Gender                  |                                                                                   | Char 1 | 'M' = Male<br>'F' = Female<br>'O' = Other<br>'T' = Transsexual<br>'U' = Unknown                                                                                                                                                                                                                                                                                                                                                                                                                                                                                                                                                                                                                                                                                                         |
| Race1<br>Race2<br>Race3 | Up to 3 different races can be reported for an individual                         | Char 2 | '01' = "White"<br>'02' = "Black"<br>'03' = "American Indian, Aleutian, or Eskimo"<br>'04' = "Chinese"<br>'05' = "Japanese"<br>'06' = "Filipino"<br>'07' = "Hawaiian"<br>'08' = "Korean"<br>'09' = "Asian Indian, Pakistani"<br>'10' = "Vietnamese"<br>'11' = "Laotian"<br>'12' = " Hmong "<br>'13' = "Kampuchean"<br>'14' = "Thai"<br>'20' = "Micronesian, NOS"<br>'21' = " Chamorran "<br>'22' = " Guamanian , NOS"<br>'25' = "Polynesian, NOS"<br>'26' = "Tahitian"<br>'27' = "Samoan"<br>'28' = "Tongan"<br>'30' = "Melanesian, NOS"<br>'31' = "Fiji Islander"<br>'32' = "New Guinean"<br>'88' = "No others known" (valid in Race2 – Race5 only)<br>'96' = "Other Asian, incl. Asian, NOS and Oriental, NOS"<br>'97' = "Pacific Islander, NOS"<br>'98' = "Other"<br>'99' = "Unknown" |

| Variable | Description | Type   | Coding                                 |
|----------|-------------|--------|----------------------------------------|
| Hispanic |             | Char 1 | 'Y' = Yes<br>'N' = No<br>' ' = Unknown |

## Diagnoses

| Variable     | Description                                                                       | Type    | Coding                                                                                                                                                                                                                                                                                       |
|--------------|-----------------------------------------------------------------------------------|---------|----------------------------------------------------------------------------------------------------------------------------------------------------------------------------------------------------------------------------------------------------------------------------------------------|
| Studyid      | Person-level identifier created at each study site for the purpose of this study. | Num 4   |                                                                                                                                                                                                                                                                                              |
| Encype       | Indicates the type of health care visit which occurred                            | Char 2  | IP = Acute inpatient hospital stay<br>ED = Emergency department visit<br>AV = Ambulatory visit (outpatient clinics, same day surgery)<br>TE = Telephone visit.<br>IS = Non-acute institutional stay<br>OE = Other visit (not overnight)<br>LO = Lab only visit<br>RO = Radiology only visit. |
| Provider     | Identifier unique to the provider most responsible for the visit                  | Char 12 | Local Code                                                                                                                                                                                                                                                                                   |
| DiagProvider | Provider associated with the actual diagnosis                                     | Char 12 | Local Code                                                                                                                                                                                                                                                                                   |
| Adate        | Visit or admission date from source system                                        | Num 4   |                                                                                                                                                                                                                                                                                              |
| Dx           | ICD-9 diagnosis code. Contains decimal point and alpha prefix as appropriate.     | Char 6  | ###.##<br>V##.##<br>E###.#                                                                                                                                                                                                                                                                   |
| Origdx       | Original diagnosis from source system                                             | Char 10 |                                                                                                                                                                                                                                                                                              |
| Pdx          | Flag. Indicating the category of this diagnosis                                   | Char 1  | P = Principal<br>S = Secondary<br>X = Not available                                                                                                                                                                                                                                          |



## Encounters

| Variable          | Description                                                                             | Type       | Coding                                                                                                                                                                                                                                                                                       |
|-------------------|-----------------------------------------------------------------------------------------|------------|----------------------------------------------------------------------------------------------------------------------------------------------------------------------------------------------------------------------------------------------------------------------------------------------|
| Studyid           | Person-level identifier created at each study site for the purpose of this study.       | Num<br>4   |                                                                                                                                                                                                                                                                                              |
| Adate             | Visit or admission date from source system                                              | Num<br>4   |                                                                                                                                                                                                                                                                                              |
| Ddate             | Discharge date for inpatient admission (blank for most outpatient visits)               | Num<br>4   |                                                                                                                                                                                                                                                                                              |
| Provider          | Identifier unique to the provider indentifying provider most responsible for the visit. | Char<br>12 | Local Code                                                                                                                                                                                                                                                                                   |
| Enc_count         | Count of visits if multiple visits on date to same provider                             | Num<br>4   | Integer value                                                                                                                                                                                                                                                                                |
| Encype            | Indicates the type of visit                                                             | Char<br>2  | IP = Acute inpatient hospital stay<br>ED = Emergency department visit<br>AV = Ambulatory visit (outpatient clinics, same day surgery)<br>TE = Telephone visit.<br>IS = Non-acute institutional stay<br>OE = Other visit (not overnight)<br>LO = Lab only visit<br>RO = Radiology only visit. |
| Encounter_subtype | Subcategories within an ENCTYPE to indicate more detail for type of visit               | Char<br>2  | AI = Acute inpatient stay (EncType = IP).<br>OB = Observation bed. (EncType = IP)<br>OC = Outpatient clinic visit. (EncType = AV)<br>SD = Same day surgery. (EncType = AV)<br>UC = Urgent care. (EncType = AV)<br>HA = Hospital ambulatory. (EncType = AV, ED).                              |

| Variable              | Description                                                                                                                               | Type    | Coding                                                                                                                                                                                                                                                                                                                                                                            |
|-----------------------|-------------------------------------------------------------------------------------------------------------------------------------------|---------|-----------------------------------------------------------------------------------------------------------------------------------------------------------------------------------------------------------------------------------------------------------------------------------------------------------------------------------------------------------------------------------|
|                       |                                                                                                                                           |         | HS = Hospice.<br>(EncType = IS, OE)<br>HH = Home health. (EncType = OE, TE)<br>SN = SNF.<br>(EncType = IS, OE)<br>NH = Nursing home, including ICF). (EncType = IS.)<br>RH = Rehab.<br>(EncType = IS, AV)<br>DI = Dialysis.<br>(EncType = IS, AV)<br>OT = Other non-hospital.<br>(EncType = IS, OE, TE, EM, AV, LO, RO)                                                           |
| Facility_code         | Local code that identifies hospital or clinic. .                                                                                          | Char 12 | Local code                                                                                                                                                                                                                                                                                                                                                                        |
| Discharge_disposition | Only applies to Facility claim based data.                                                                                                | Char 1  | A = Discharged alive<br>E = Expired<br>U = Unknown                                                                                                                                                                                                                                                                                                                                |
| Discharge_status      | Identifies the location to which the patient is discharged from an inpatient visit                                                        | Char 2  | AF = Adult foster home<br>AL = Assisted living facility<br>AM = Against medical advice<br>AW = Absent without leave<br>EX = Expired<br>HH = Home health<br>HS = Hospice<br>HO = Home/self care<br>IP = Other acute inpatient hospital<br>NH = Nursing home, including ICF<br>OT = Other<br>RS = residential facility<br>RH = Rehab facility<br>SH = Still in hospital<br>SN = SNF |
| Drg                   | (Optional.) Diagnostic Related Group. Use for hospital and overnight visits. (only populated when encype='IP' and encounter_subtype='AI') | Char 3  |                                                                                                                                                                                                                                                                                                                                                                                   |
| Admitting_source      | Only populated when encype='IP'                                                                                                           | Char 2  | AV = Ambulatory visit<br>ED = Emergency department                                                                                                                                                                                                                                                                                                                                |

| Variable   | Description                     | Type      | Coding                                                                                                                                                                                                                                                                                                                                                                                                                                                                                                                                                                                                                                                               |
|------------|---------------------------------|-----------|----------------------------------------------------------------------------------------------------------------------------------------------------------------------------------------------------------------------------------------------------------------------------------------------------------------------------------------------------------------------------------------------------------------------------------------------------------------------------------------------------------------------------------------------------------------------------------------------------------------------------------------------------------------------|
|            |                                 |           | AF = Adult foster home<br>AL = Assisted living facility<br>HH = Home health<br>HS = Hospice<br>HO = Home/self care<br>IP = Other acute inpatient hospital<br>NH = Nursing home, including ICF<br>OT = Other<br>RS = Residential facility<br>RH = Rehab facility<br>SN = SNF<br>UN = Unknown                                                                                                                                                                                                                                                                                                                                                                          |
| Department | Department where visit occurred | Char<br>4 | ACUP=Acupuncture<br>ALGY=Allergy<br>AMBU=Ambulance Services<br>ANES=Anesthesiology<br>AUD=Audiology<br>CARD=Cardiology<br>CASR=Cast Room<br>CHEM=Chemical and Alcohol Dependency<br>CHIR=Chiropractic<br>CMHL=Community Health<br>CRIT=Critical Care Medicine<br>CRMG=Care Management<br>DENT=Dental<br>DERM=Dermatology<br>DIAL=Dialysis<br>DME=Durable Medical Equipment<br>EDUC=Education<br>ENDO=Endocrinology<br>ENT=Otolaryngology<br>ER=Emergency Room<br>FP=Family Practice<br>GEN=Genetics<br>GER=Gerontology/Geriatics<br>GI=Gastro-Intestinal Medicine<br>HAP=Health Appraisals<br>HEP=Hepatology<br>HH=Home Health<br>HOSP=Hospital Care<br>HSPC=Hospice |

| Variable | Description | Type | Coding                                                                                                                                                                                                                                                                                                                                                                                                                                                                                                                                                                                                                                                                                                                                                                                                                                                                                                                                                                                                                              |
|----------|-------------|------|-------------------------------------------------------------------------------------------------------------------------------------------------------------------------------------------------------------------------------------------------------------------------------------------------------------------------------------------------------------------------------------------------------------------------------------------------------------------------------------------------------------------------------------------------------------------------------------------------------------------------------------------------------------------------------------------------------------------------------------------------------------------------------------------------------------------------------------------------------------------------------------------------------------------------------------------------------------------------------------------------------------------------------------|
|          |             |      | ICF=Intermediate Care Facility<br>IM=Internal Medicine<br>IMUN=Immunology<br>IND=Industrial Medicine<br>INF=Infectious Disease<br>INFU=Infusion Center<br>IR=Injection Room<br>LAB=Laboratory<br>MH=Mental Health<br>NATU=Naturopathy<br>NEUR=Neurology<br>NEWB=Newborn<br>NRSG=Neurosurgery<br>NUCL=Nuclear Medicine<br>NUT=Nutrition<br>OBGN=Obstetrics/Gynecology<br>OCTH=Occupational Therapy<br>ONC=Oncology<br>OPTH=Ophthalmology<br>OPTO=Optometry<br>ORTH=Orthopedics<br>OST=Osteopathy<br>PAL=Palliative Care<br>PATH=Pathology<br>PC=Primary Care<br>PEDS=Pediatrics<br>PERI=Perinatology<br>PHYS=Physiatry<br>POD=Podiatry<br>PSRG=Plastic Surgery<br>PT=Physical Therapy<br>PULM=Pulmonary Medicine<br>RAD=Radiology<br>RADT=Radiation Therapy<br>RECT=Recreational Therapy<br>REHB=Rehabilitation<br>RESP=Respiratory Therapy<br>RHEU=Rheumatology<br>RN=Registered Nurse<br>SNF=Skilled Nursing Facility<br>SPOR=Sports Medicine<br>SPTH=Speech Therapy<br>SURG=General Surgery<br>TRAN=Transplant<br>URG=Urgent Care |

| Variable | Description | Type | Coding                                                                                       |
|----------|-------------|------|----------------------------------------------------------------------------------------------|
|          |             |      | URO=Urology<br>OTH=Other<br>UNK=Unknown<br>IND=Industrial Medicine<br>INF=Infectious Disease |

## Enrollment

| Variable Name       | Description                                                                       | Type   | Coding                                          |
|---------------------|-----------------------------------------------------------------------------------|--------|-------------------------------------------------|
| Studyid             | Person-level identifier created at each study site for the purpose of this study. | Num 4  |                                                 |
| enr_start           | Beginning date of enrollment period                                               | Num 4  |                                                 |
| enr_end             | End of enrollment period                                                          | Num 4  |                                                 |
| Ins_Medicaid        | Flag for Medicaid coverage during the period.                                     | Char 1 | “Y”=Yes<br>“N” = No<br>“U” or missing = Unknown |
| Ins_Commercial      | Flag for Commercial coverage during the period.                                   | Char 1 | “Y”=Yes<br>“N” = No<br>“U” or missing = Unknown |
| Ins_PrivatePay      | Flag for Private Pay coverage during the period.                                  | Char 1 | “Y”=Yes<br>“N” = No<br>“U” or missing = Unknown |
| Ins_StateSubsidized | Flag for state subsidized coverage during the period.                             | Char 1 | “Y”=Yes<br>“N” = No<br>“U” or missing = Unknown |
| Ins_SelfFunded      | Flag for coverage through an Employer group that insures itself.                  | Char 1 | “Y”=Yes<br>“N” = No<br>“U” or missing = Unknown |
| Ins_HighDeductible  | Flag for coverage in a high-deductible plan.                                      | Char 1 | “Y”=Yes<br>“N” = No<br>“U” or missing = Unknown |
| Ins_Medicare        | Flag for Medicare coverage, including Medicare Working Aged                       | Char 1 | “Y”=Yes<br>“N” = No<br>“U” or missing = Unknown |
| Ins_Medicare_A      | Flag for Medicare Part A coverage during the period.                              | Char 1 | “Y”=Yes<br>“N” = No<br>“U” or missing = Unknown |
| Ins_Medicare_B      | Flag for Medicare Part B coverage during the period.                              | Char 1 | “Y”=Yes<br>“N” = No<br>“U” or missing = Unknown |
| Ins_Medicare_C      | Flag indicating the person                                                        | Char 1 | “Y”=Yes                                         |

|                     |                                                                                                                                                                          |         |                                                                                                                                                                                                                 |
|---------------------|--------------------------------------------------------------------------------------------------------------------------------------------------------------------------|---------|-----------------------------------------------------------------------------------------------------------------------------------------------------------------------------------------------------------------|
|                     | had Medicare Part C coverage during the period.                                                                                                                          |         | “N” = No<br>“U” or missing = Unknown                                                                                                                                                                            |
| Ins_Medicare_D      | Flag for Medicare Part D coverage during the period.                                                                                                                     | Char 1  | “Y”=Yes<br>“N” = No<br>“U” or missing = Unknown                                                                                                                                                                 |
| Ins_Other           | Flag for Other type of coverage during the period.                                                                                                                       | Char 1  | “Y”=Yes<br>“N” = No<br>“U” or missing = Unknown                                                                                                                                                                 |
| plan_hmo            | Flag for some coverage under an HMO plan                                                                                                                                 | Char 1  | “Y”=Yes<br>“N” = No<br>“U” or missing = Unknown                                                                                                                                                                 |
| plan_pos            | Flag for some coverage under a point-of-service plan                                                                                                                     | Char 1  | “Y”=Yes<br>“N” = No<br>“U” or missing = Unknown                                                                                                                                                                 |
| plan_ppo            | Flag for some coverage under a preferred provider organization plan                                                                                                      | Char 1  | “Y”=Yes<br>“N” = No<br>“U” or missing = Unknown                                                                                                                                                                 |
| plan_indemnity      | Flag for some coverage under a traditional indemnity plan.                                                                                                               | Char 1  | “Y”=Yes<br>“N” = No<br>“U” or missing = Unknown                                                                                                                                                                 |
| Drugcov             | Flag for at least some payment/coverage for prescription drugs.                                                                                                          | Char 1  | “Y”=Yes<br>“N” = No<br>“U” or missing = Unknown                                                                                                                                                                 |
| outside_utilization | Is this person/period likely to have substantial health care utilization outside the HMO system, under circumstances that would not result in a claim to the health plan | Char 1  | Y = Yes, we expect the utilization capture for this person/period is incomplete.<br>N = No, there is no reason to suspect we have incomplete capture of utilization.<br>U = completeness of capture is unknown. |
| Enrollment_basis    | The basis for capture of the medical record in the VDW.                                                                                                                  | Char 1  | G = Geographic Basis<br>I = Insurance Basis<br>B = Both bases                                                                                                                                                   |
| Pcc                 | The clinic to which the patient is paneled in administrative record. Uses same code list as Facility_Code in Encounter table.                                            | Char 12 | Local Code                                                                                                                                                                                                      |
| Pcp                 | The clinician to which the patient is paneled in administrative data. Uses same code list as Provider in Encounter table                                                 | Char 12 | Local Code                                                                                                                                                                                                      |

## Procedures

| Variable            | Description                                                                                               | Type    | Coding                                                                                                                                                                                                                                                                                       |
|---------------------|-----------------------------------------------------------------------------------------------------------|---------|----------------------------------------------------------------------------------------------------------------------------------------------------------------------------------------------------------------------------------------------------------------------------------------------|
| Studyid             | Person-level identifier created at each study site for the purpose of this study.                         | Num 4   |                                                                                                                                                                                                                                                                                              |
| Adate               | Visit or admission date from source system                                                                | Num 4   |                                                                                                                                                                                                                                                                                              |
| Provider            | Identifier unique to the provider indentifying provider most responsible for the visit.                   | Char 12 | Local Code                                                                                                                                                                                                                                                                                   |
| Enctype             | Indicates the type of visit.                                                                              | Char 2  | IP = Acute inpatient hospital stay<br>ED = Emergency department visit<br>AV = Ambulatory visit (outpatient clinics, same day surgery)<br>TE = Telephone visit.<br>IS = Non-acute institutional stay<br>OE = Other visit (not overnight)<br>LO = Lab only visit<br>RO = Radiology only visit. |
| Performing Provider | Provider associated with the actual procedure.                                                            | Char 12 |                                                                                                                                                                                                                                                                                              |
| pxdate              | Date the procedure was performed, or ADATE (admission date) for the visit in which the procedure occurred | Num 4   |                                                                                                                                                                                                                                                                                              |
| Px                  | Specific code which details the procedure performed                                                       | Char 6  |                                                                                                                                                                                                                                                                                              |
| Origpx              | Actual value from source data.                                                                            | Char 10 |                                                                                                                                                                                                                                                                                              |
| Codetype            | Flag to indicate type of procedure code.                                                                  | Char 1  | I = ICD-9<br>C = CPT-4<br>H = HCPCS<br>R = Revenue code<br>L = Local homegrown<br>O = Other                                                                                                                                                                                                  |
| Pxcnt               | Number of times the procedure was performed during the visit.                                             | Num 4   |                                                                                                                                                                                                                                                                                              |

## Labs

| Variable    | Description                                                                                               | Type    | Coding                                                                                                                                                                                                                                                                              |
|-------------|-----------------------------------------------------------------------------------------------------------|---------|-------------------------------------------------------------------------------------------------------------------------------------------------------------------------------------------------------------------------------------------------------------------------------------|
| Studyid     | Person-level identifier created at each study site for the purpose of this study.                         | Num 4   | Studyid                                                                                                                                                                                                                                                                             |
| Test_Type   | Name of the test                                                                                          | Char 10 | SODIUM = Sodium<br>K = Potassium Serum<br>BUN =<br>CREATININE = Creatinine<br>Blood/Serum/Plasma<br>HGB = Hemoglobin in Blood<br>HCT = Hematocrit in Blood<br>INR = prothrombin International<br>Normalized Ratio<br>GLU_RAN = Blood Sugar<br>Random<br>GLU_F = Blood Sugar Fasting |
| Loinc       | Logical Observation Identifiers Names and Codes                                                           | Char 10 | Codes in the form of nnnnn-n                                                                                                                                                                                                                                                        |
| Local_cd    | Non LOINC code related to lab test result                                                                 | Char 25 | Unique to each health plan                                                                                                                                                                                                                                                          |
| Battery_cd  | Battery code                                                                                              | Char 50 | Unique to each health plan                                                                                                                                                                                                                                                          |
| px          | Related procedure code (most likely CPT)                                                                  | Char 6  |                                                                                                                                                                                                                                                                                     |
| Codetype    | Specifies what type of code PX used                                                                       | Char 1  | C=CPT,<br>I=ICD9,<br>H=HCPCS,<br>L=local home-grown,<br>O=other                                                                                                                                                                                                                     |
| Order_dt    | Date test was ordered                                                                                     | Num 4   |                                                                                                                                                                                                                                                                                     |
| Lab_dt      | Date specimen was collected                                                                               | Num 4   |                                                                                                                                                                                                                                                                                     |
| Lab_tm      | Time specimen was collected                                                                               | Num 4   |                                                                                                                                                                                                                                                                                     |
| Result_dt   | Date of test result                                                                                       | Num 4   |                                                                                                                                                                                                                                                                                     |
| Result_tm   | Time of test result                                                                                       | Num 4   |                                                                                                                                                                                                                                                                                     |
| Result_C    | Test result as short character                                                                            | Char 8  |                                                                                                                                                                                                                                                                                     |
| Modifier    | Optional qualifier for RESULT_C value                                                                     | Char 2  | 'TX'=text<br>'EQ'=equal<br>'LT'=less than<br>'LE'=less than or equal to<br>'GT'=greater than<br>'GE'=greater than or equal to                                                                                                                                                       |
| Result_unit | Units in which result is reported. Future recoding will probably be necessary to standardize among sites. | Char 11 | possible values include %, IU/L, MEQ/L, MG/DL, THERAPEUTIC as well as others                                                                                                                                                                                                        |



| Variable      | Description                                                                           | Type    | Coding                                                                                                                                                                  |
|---------------|---------------------------------------------------------------------------------------|---------|-------------------------------------------------------------------------------------------------------------------------------------------------------------------------|
| Normal_low_C  | Lowest value of normal range for this test/instrumentation/etc as short character.    | Char 8  |                                                                                                                                                                         |
| Modifier_low  | Optional qualifier for NORMAL_LOW_C value                                             | Char 2  | 'TX'=text<br>'EQ'=equal<br>'LT'=less than<br>'LE'=less than or equal to<br>'GT'=greater than<br>'GE'=greater than or equal to                                           |
| Normal_high_C | Highest value of normal range for this test/instrumentation/etc as short character.   | Char 8  |                                                                                                                                                                         |
| Modifier_high | Optional qualifier for NORMAL_HIGH_C value                                            | Char 2  | 'TX'=text<br>'EQ'=equal<br>'LT'=less than<br>'LE'=less than or equal to<br>'GT'=greater than<br>'GE'=greater than or equal to                                           |
| Abn_ind       | Abnormal result indicator                                                             | Char 1  | 'AB'=abnormal<br>'C'=critical<br>'AH'=abnormal high<br>'CH'=critical high<br>'AL'=abnormal low<br>'CL'=critical low<br>'IN'=Inconclusive<br>'UK'=unknown<br>'NL'=normal |
| Order_prov    | Ordering provider                                                                     | Char 6  | Same coding scheme as rxmd in PHARMACY table or provider in ENCOUNTERS table.                                                                                           |
| Order_dept    | Department of ordering provider                                                       | Char 4  | Same coding scheme as department in ENCOUNTERS table.                                                                                                                   |
| Facility_code | Code indicating location, such as specific hospital or clinic, where order originated | Char 12 | Same coding scheme as facility_code in ENCOUNTERS table.                                                                                                                |

## Pharmacy

| Variable | Description                                                                       | Type  | Coding |
|----------|-----------------------------------------------------------------------------------|-------|--------|
| Studyid  | Person-level identifier created at each study site for the purpose of this study. | Num 4 |        |
| rxdate   | sold date.                                                                        | Num 4 |        |

| Variable | Description                                                                | Type    | Coding |
|----------|----------------------------------------------------------------------------|---------|--------|
| Ndc      | National Drug Code                                                         | Char 11 |        |
| Rxsup    | Number of days supply                                                      | Num 4   |        |
| Rxamt    | Number of units (pills, tablets) dispensed. Net amount per day per NDC.    | Num 4   |        |
| Rxmd     | Prescribing MD<br>Uses same coding scheme as PROVIDER in Utilization table | Char 9  |        |

## Vitals

| Variable     | Description                                                                       | Type   | Coding                                                                                                                                                                                                                                                                                       |
|--------------|-----------------------------------------------------------------------------------|--------|----------------------------------------------------------------------------------------------------------------------------------------------------------------------------------------------------------------------------------------------------------------------------------------------|
| Studyid      | Person-level identifier created at each study site for the purpose of this study. | Num 4  |                                                                                                                                                                                                                                                                                              |
| Enctype      | Visit Type                                                                        | Char 2 | IP = Acute inpatient hospital stay<br>ED = Emergency department visit<br>AV = Ambulatory visit (outpatient clinics, same day surgery)<br>TE = Telephone visit.<br>IS = Non-acute institutional stay<br>OE = Other visit (not overnight)<br>LO = Lab only visit<br>RO = Radiology only visit. |
| Measure_Date | Date the vital signs were measured.                                               | Num 4  |                                                                                                                                                                                                                                                                                              |
| Tobacco      | Tobacco Status                                                                    | Num 3  | 1 = current user<br>2 = never<br>3 = quit/former user<br>4 = passive<br>5 = environmental exposure<br>6 = not asked<br>7 = conflicting                                                                                                                                                       |
| Tobacco_Type | Tobacco other than cigarettes used                                                | Num 3  | 1 = Cigarettes only<br>2 = Other tobacco only<br>3 = Cigarettes and other tobacco<br>4 = None                                                                                                                                                                                                |
| HT           | Height (inches)                                                                   | Num 8  | ####.## = If can be represented in inches<br>Null = HT is missing                                                                                                                                                                                                                            |
| WT           | Weight (lbs)                                                                      | Num 8  | ####.## = If can be represented in pounds<br>Null = WT is missing                                                                                                                                                                                                                            |
| Diastolic    | Diastolic blood pressure                                                          | Num 4  | ### = If can be represented in MmHg<br>Null = Diastolic is missing                                                                                                                                                                                                                           |

| Variable | Description                                        | Type   | Coding                                                            |
|----------|----------------------------------------------------|--------|-------------------------------------------------------------------|
| Systolic | Systolic blood pressure                            | Num 4  | ### = If can be represented in MmHg<br>Null = Systolic is missing |
| BP_Type  | Optional. Type of blood pressure taken             | Char 1 | R=Rooming<br>O=Orthostatic<br>M=Multiple<br>E=Extended            |
| Position | Optional. Position for Orthostatic Blood Pressures | Char 1 | Blank/Null = unknown<br>1 = sitting<br>2 = standing<br>3 = supine |

## Death

| Variable | Description                                                                                                                                                                                                                                     | Type   | Coding                                                                                                                                      |
|----------|-------------------------------------------------------------------------------------------------------------------------------------------------------------------------------------------------------------------------------------------------|--------|---------------------------------------------------------------------------------------------------------------------------------------------|
| Studyid  | Person-level identifier created at each study site for the purpose of this study.                                                                                                                                                               | Num 4  |                                                                                                                                             |
| DeathDt  | Date of death                                                                                                                                                                                                                                   | Num 4  |                                                                                                                                             |
| DtImpute | Identify part of DeathDt imputed                                                                                                                                                                                                                | Char 1 | M = Month of date imputed<br>D = Day of date imputed<br>B = Both month and day imputed<br>N = Not imputed                                   |
| UnderCOD | Underlying cause of death is defined by the World Health Organization as the disease or injury that initiated the train of events leading directly to death, or the circumstances of the accident or violence, which produced the fatal injury. | Char 6 | (ICD code)                                                                                                                                  |
| Codetype | Describes the coding type for UnderCOD                                                                                                                                                                                                          | Char 1 | A = ICD-10<br>B = ICD-9<br>Missing when cause of death is unknown                                                                           |
| Source   | Means by which death data obtained                                                                                                                                                                                                              | Char 1 | S = State Death files<br>N = National Death Index<br>T = Tumor data<br>M= Common Membership<br>C=Clarity/HC<br>(Others are locally defined) |

**Masoudi FA et al.**

**Appendix D: Data Dictionary for ICD Therapy Data Repository**

Ascertainment

| Field Name               | Description                                                                       | Type     | Coding                                                                                      |
|--------------------------|-----------------------------------------------------------------------------------|----------|---------------------------------------------------------------------------------------------|
| StudyID                  | Subject-level Identifier, created at each site for the purpose of this study only | Num 8    |                                                                                             |
| AbstractorID             | Identity of individual doing the chart abstraction                                | Char 5   |                                                                                             |
| A3_Abstraction_date      | Date of abstraction                                                               | Date     |                                                                                             |
| Batch_num                | Number of Batch record was selected                                               | Num 1    |                                                                                             |
| A4a_FirstImplant_YN      | Identifier for whether listed implant is subject's first implant                  | Num 1    | 1=Yes 2=No                                                                                  |
| A4b_Prev_Implant_Dt      | Date of previous implant                                                          | Date     |                                                                                             |
| A4b_does_Q5_exist        | Does question #5 exist on form (used to identify form version)                    | Num 1    | 1=Yes 2=No                                                                                  |
| A5_deathdt_yr            | Year of subject death                                                             | Num 2    |                                                                                             |
| A5_deathdt_mo            | Month of subject death                                                            | Num 2    |                                                                                             |
| A5_deathdt_day           | Day of subject death                                                              | Num 2    |                                                                                             |
| C1_Followed_thru_end_YN  | Was patient followed through end of study period                                  | Num 1    | 1=Yes 2=No                                                                                  |
| C1A_Reason_ifN           | If Patient was not followed through end date, why not?                            | Num 1    | 1=Death before end<br>2=Device turned off<br>3=Transferred Care<br>4=Other<br>5=10 Episodes |
| C1A_DOD                  | Date of death (if C1A_Reason_ifN = 1)                                             | Date     |                                                                                             |
| C1A_Turnoff              | Date device was turned off (if C1A_Reason_ifN = 2)                                | Date     |                                                                                             |
| C1A_Transfer             | Date care was transferred (if C1A_Reason_ifN = 3)                                 | Date     |                                                                                             |
| C1A_Other                | What occurred to end participant followup (if C1A_Reason_ifN = 4)                 | Char 255 |                                                                                             |
| C1_Other_Date            | Date "other" occurred (if C1A_Reason_ifN = 4)                                     | Date     |                                                                                             |
| C1A_10episodes           | Date of last qualifying episode (if C1A_Reason_ifN = 5)                           | Date     |                                                                                             |
| C2_Attached_surg_note_YN | Is surgical note attached?                                                        | Num 1    | 1=Yes 2=No                                                                                  |
| C2b_attached_reason_ifN  | If no surgical note, why not?                                                     | Char 255 |                                                                                             |
| C2_Attached_docA         | Is interrogation report attached?                                                 | Num 1    | 1=Yes 2=No                                                                                  |
| C2_Int_rpt_dt            | If interrogation report is present, what date?                                    | Date     |                                                                                             |
| C2_Int_rsn_ifN           | If no interrogation report, why not?                                              | Char 255 |                                                                                             |
| C2_Attached_docB         | Is clinical note attached?                                                        | Num 1    | 1=Yes 2=No                                                                                  |
| C2_Clin_note_dt          | If clinical note is present, what date?                                           | Date     |                                                                                             |
| C2_reason_ifN            | If no clinical note, why not?                                                     | Char 255 |                                                                                             |
| Received                 | Timestamp set by row creation                                                     | DateTime |                                                                                             |
| Modified                 | Timestamp set by row update                                                       | DateTime |                                                                                             |
| Ascertainment_Comment    | Comments left on ascertainment form                                               | Char 255 |                                                                                             |

Main Table Interrogation

| Field Name            | Description                                                                       | Type     | Coding     |
|-----------------------|-----------------------------------------------------------------------------------|----------|------------|
| StudyID               | Subject-level Identifier, created at each site for the purpose of this study only | Num 8    |            |
| ImplantDt             | Date of first implant                                                             | Date     |            |
| B3_EndDt              | End date (based on abstracted end point)                                          | Date     |            |
| B11_gappresent_YN     | Was gap present in followup of > 6 months?                                        | Num 1    | 1=Yes 2=No |
| B11_Gap_Comment       | Comment regarding gap presence                                                    | Char 255 |            |
| B11_Main_Comments     | Comments regarding interrogation followup in general                              | Char 255 |            |
| B11_diverted_episodes | How many diverted episodes are present in the interrogation data?                 | Num 2    |            |
| Total_TE              | Total Treated Episodes                                                            | Num 2    |            |

\*Sub Table

| Field Name              | Description                                                                       | Type     | Coding                                        |
|-------------------------|-----------------------------------------------------------------------------------|----------|-----------------------------------------------|
| StudyID                 | Subject-level Identifier, created at each site for the purpose of this study only | Num 8    |                                               |
| B4_Interrogation_Date   | Date of interrogation                                                             | Date     |                                               |
| B5_Check_Type           | Type of interrogation/check                                                       | Char 1   | C=Clinic<br>R=Remote<br>H=Hospital<br>O=Other |
| B6_Therapy_YN           | Are therapies present during this interrogation?                                  | Num 1    | 1=Yes 2=No                                    |
| B8_Rpt_Available_YN     | Is device Interrogation report available?                                         | Num 1    | 1=Yes 2=No                                    |
| B9_Device_Totals_YN     | Are cumulative device totals available in report?                                 | Num 1    | 1=Yes 2=No                                    |
| B9b_Remote_dataYN       | Is remote data available?                                                         | Num 1    | 1=Yes 2=No                                    |
| B10_Clin_Notes_Avail_YN | Are clinical notes available?                                                     | Num 1    | 1=Yes 2=No                                    |
| B11_Sub_Comments        | Comments regarding this interrogation                                             | Char 255 |                                               |

\*Sub table exists in a one-to-many relationship to the main table

Episodes Requiring Therapy

| Field Name            | Description                                                                       | Type  | Coding |
|-----------------------|-----------------------------------------------------------------------------------|-------|--------|
| StudyID               | Subject-level Identifier, created at each site for the purpose of this study only | Num 8 |        |
| B4_Interrogation_Date | Date of interrogation                                                             | Date  |        |
| B7_Dates_of_Episodes  | Date of episode                                                                   | Date  |        |

Event Cover

| Field Name               | Description                                                                       | Type     | Coding               |
|--------------------------|-----------------------------------------------------------------------------------|----------|----------------------|
| StudyID                  | Subject-level Identifier, created at each site for the purpose of this study only | Num 8    |                      |
| Treated_Episode_Num      | Which treated episode does this form refer to                                     | Num 2    | 1-10                 |
| AbstractorID             | Identity of individual doing the chart abstraction                                | Char 5   |                      |
| 2_three_or_more_episodes | Did 3 or more episodes occur in 24h?                                              | Num 1    | 1=Yes 2=No           |
| 3_Interrogation_Date     | Date of interrogation                                                             | Date     |                      |
| 4_Therapy_Date           | Date of therapy                                                                   | Date     |                      |
| 5_Therapy_time_H         | Hour at which therapy occurred                                                    | Char 2   |                      |
| 5_Therapy_time_M         | Minute at which therapy occurred                                                  | Char 2   |                      |
| 5_Therapy_time_S         | Second at which therapy occurred                                                  | Char 2   |                      |
| 5_Time_type              | Detail on how to interpret time (if available - AM/PM/Military)                   | Char 8   | AM<br>PM<br>Military |
| 6a_Rpt_attached          | Device interrogation report attached?                                             | Num 1    | 1=Yes 2=No           |
| 6a_Comment               | Comment regarding interrogation report                                            | Char 255 |                      |
| 6b_ECG_attached          | Electrocardiogram attached?                                                       | Num 1    | 1=Yes 2=No           |
| 6b_Comment               | Comment regarding electrocardiogram                                               | Char 255 |                      |
| 6c_Clin_Note_attached    | Clinical note attached?                                                           | Num 1    | 1=Yes 2=No           |
| 6c_Comment               | Comment regarding clinical note                                                   | Char 255 |                      |
| 7_Episode_Comment        | Overall episode comment                                                           | Char 255 |                      |

Main Table Central Review

| Field Name       | Description                                                                       | Type   | Coding     |
|------------------|-----------------------------------------------------------------------------------|--------|------------|
| SID              | Subject-level Identifier, created at each site for the purpose of this study only | Num 8  |            |
| Reviewer_ID      | Identity of central reviewer                                                      | Char 4 |            |
| Treated_Episodes | Are treated episodes present during the followup period?                          | Num 1  | 1=Yes 2=No |

\*Sub Table

| Field Name         | Description                                                              | Type     | Coding                                                                                                                      |
|--------------------|--------------------------------------------------------------------------|----------|-----------------------------------------------------------------------------------------------------------------------------|
| Interrogation_Date | Interrogation Date                                                       | Date     |                                                                                                                             |
| Treated_Episode    | Treated episode number                                                   | Num 2    | 1-10                                                                                                                        |
| Episode_Date       | Treated episode date                                                     | Date     |                                                                                                                             |
| Unknown_Date       | Is treated episode date unknown?                                         | Num 1    | 1=Yes 2=No                                                                                                                  |
| Episode_Time_H     | Hour at which treated episode occurred                                   | Num 2    |                                                                                                                             |
| Episode_Time_M     | Minute at which treated episode occurred                                 | Num 2    |                                                                                                                             |
| Episode_Time_S     | Second at which treated episode occurred                                 | Num 2    |                                                                                                                             |
| Unknown_time       | Is time of treated episode uncertain?                                    | Num 1    | 1=Yes 2=No                                                                                                                  |
| Time_type          | Detail on how to interpret time (if available - AM/PM/Military)          | Char 8   | AM<br>PM<br>Military                                                                                                        |
| Therapy_Type       | Type of treatment applied                                                | Num 1    | 1=ATP<br>2=Shock<br>3=Not an Episode<br>4=Unknown                                                                           |
| Shock_count        | Did episode include shocks?                                              | Num 1    | 1=Yes, one shock<br>2=No<br>3=Yes, Multiple<br>4=Yes, Unsure of Count                                                       |
| Additional_shocks  | If initial therapy was shock, did episode include additional shocks?     | Num 1    | 1=Yes 2=No                                                                                                                  |
| Local_prov         | Local provider's impression of treatment appropriateness                 | Char 1   | A=Appropriate<br>I=Inappropriate                                                                                            |
| Appropriate        | Reviewers impression of appropriateness of treatment                     | Num 1    | 1=Definitely Appropriate<br>2=Probably Appropriate<br>3=Uncertain<br>4=Probably Inappropriate<br>5=Definitely Inappropriate |
| Successful         | If appropriate, was treatment successful?                                | Num 1    | 1=Yes 2=No                                                                                                                  |
| Cause              | If inappropriate, what was cause?                                        | Num 1    | 1=SVT/AF<br>2=Sensing<br>3=Other                                                                                            |
| Untoward_Rhythm    | If inappropriate, did therapy cause untoward rhythm?                     | Num 1    | 1=Yes 2=No                                                                                                                  |
| Sufficient_Doc     | Was documentation sufficient to make a determination of appropriateness? | Num 1    | 1=Yes by E-gram<br>2=No<br>3=Yes, by other clin. features<br>4=Yes, by local interp.                                        |
| Notes              | Comments on this treated episode                                         | Char 255 |                                                                                                                             |

\*Sub table exists in a one-to-many relationship to the main table

Central Review Resolution

| Field Name         | Description                                                                                     | Type     | Coding                                                                                                                                      |
|--------------------|-------------------------------------------------------------------------------------------------|----------|---------------------------------------------------------------------------------------------------------------------------------------------|
| SID                | Subject-level Identifier, created at each site for the purpose of this study only               | Num 8    |                                                                                                                                             |
| Reviewer_ID        | Identity of central reviewer                                                                    | Char 4   |                                                                                                                                             |
| Interrogation_Date | Interrogation Date                                                                              | Date     |                                                                                                                                             |
| Treated_Episode    | Treated episode number                                                                          | Num 2    | 1-10                                                                                                                                        |
| Episode_time       | Time of the episode                                                                             | Time     |                                                                                                                                             |
| Time_type          | Detail on how to interpret time (if available - AM/PM/Military)                                 | Char 8   | AM<br>PM<br>Military                                                                                                                        |
| Therapy_type       | Type of treatment applied                                                                       | Num 1    | 1=ATP<br>2=Shock<br>3=Not an Episode<br>4=Uncertain<br>5=Unresolved                                                                         |
| Shock_count        | Did episode include shocks?                                                                     | Num 1    | 1=Yes, one shock<br>2=No<br>3=Yes, Multiple<br>4=Yes, Unsure of Count                                                                       |
| Additional_shocks  | If initial therapy was shock, did episode include additional shocks?                            | Num 1    | 1=Yes 2=No 3=Unresolved                                                                                                                     |
| Local_prov         | Local provider's impression of treatment appropriateness                                        | Num 1    | 1=Appropriate<br>2=Uncertain<br>3=Inappropriate<br>4=Unresolved                                                                             |
| Appropriate        | Reviewers impression of appropriateness of treatment                                            | Num 1    | 1=Definitely Appropriate<br>2=Probably Appropriate<br>3=Uncertain<br>4=Probably Inappropriate<br>5=Definitely Inappropriate<br>6=Unresolved |
| Successful         | If appropriate, was treatment successful?                                                       | Num 1    | 1=Yes 2=No 3=Missing 4=Unresolved                                                                                                           |
| Cause              | If inappropriate, what was cause?                                                               | Num 1    | 1=SVT/AF<br>2=Sensing<br>3=Other<br>4=Unresolved                                                                                            |
| Untoward_Rhythm    | If inappropriate, did therapy cause untoward rhythm?                                            | Num 1    | 1=Yes 2=No 3=Unresolved                                                                                                                     |
| Sufficient_Doc     | Was documentation sufficient to make a determination of appropriateness?                        | Num 1    | 1=Yes by E-gram<br>2=No<br>3=Yes, by other clin. features<br>4=Yes, by local interp.<br>5=Unresolved                                        |
| Ext_rev            | This therapy raised enough questions that the reviewers choose it for automatic external review | Num 1    | 1=Yes 2=No                                                                                                                                  |
| Notes              | Comments on this treated episode                                                                | Char 255 |                                                                                                                                             |



Main Table External Review

| Field Name      | Description                                                                       | Type   | Coding |
|-----------------|-----------------------------------------------------------------------------------|--------|--------|
| SID             | Subject-level Identifier, created at each site for the purpose of this study only | Num 8  |        |
| Reviewer_ID     | Identity of central reviewer                                                      | Char 4 |        |
| Treated_Episode | Treated episode number                                                            | Num 2  | 1-10   |

\*Sub Table

| Field Name           | Description                                                              | Type     | Coding                                                                                                                      |
|----------------------|--------------------------------------------------------------------------|----------|-----------------------------------------------------------------------------------------------------------------------------|
| Episode_Time_H       | Hour at which treated episode occurred                                   | Num 2    |                                                                                                                             |
| Episode_Time_M       | Minute at which treated episode occurred                                 | Num 2    |                                                                                                                             |
| Time                 | Time of treated episode (if known)                                       | Time     |                                                                                                                             |
| Initial_Therapy_type | Type of treatment applied initially                                      | Num 1    | 1=ATP<br>2=Shock<br>3=Uncertain<br>4=Not an Episode                                                                         |
| Shock_count          | Did episode include shocks?                                              | Num 1    | 1=Yes, one shock<br>2=No<br>3=Yes, Multiple<br>4=Yes, Unsure of Count                                                       |
| Additional_shocks    | If initial therapy was shock, did episode include additional shocks?     | Num 1    | 1=Yes 2=No                                                                                                                  |
| Local_prov           | Local provider's impression of treatment appropriateness                 | Char 1   | A=Appropriate<br>I=Inappropriate                                                                                            |
| Appropriate          | Reviewers impression of appropriateness of treatment                     | Num 1    | 1=Definitely Appropriate<br>2=Probably Appropriate<br>3=Uncertain<br>4=Probably Inappropriate<br>5=Definitely Inappropriate |
| Successful           | If appropriate, was treatment successful?                                | Num 1    | 1=Yes 2=No                                                                                                                  |
| Cause                | If inappropriate, what was cause?                                        | Num 1    | 1=SVT/AF<br>2=Sensing<br>3=Other                                                                                            |
| Untoward_Rhythm      | If inappropriate, did therapy cause untoward rhythm?                     | Num 1    | 1=Yes 2=No                                                                                                                  |
| Sufficient_Doc       | Was documentation sufficient to make a determination of appropriateness? | Num 1    | 1=Yes by E-gram<br>2=No<br>3=Yes, by other clin. features<br>4=Yes, by local interp.                                        |
| Comments             | General notes regarding this therapy                                     | Char 255 |                                                                                                                             |

\*Sub table exists in a one-to-many relationship to the main table

External Review Resolution

| Field Name        | Description                                                                       | Type     | Coding                                                                                                                                      |
|-------------------|-----------------------------------------------------------------------------------|----------|---------------------------------------------------------------------------------------------------------------------------------------------|
| SID               | Subject-level Identifier, created at each site for the purpose of this study only | Num 8    |                                                                                                                                             |
| Reviewer_ID       | Identity of central reviewer                                                      | Char 4   |                                                                                                                                             |
| Treated_Episode   | Treated episode number                                                            | Num 2    | 1-10                                                                                                                                        |
| Episode_time      | Treated episode time                                                              | time     |                                                                                                                                             |
| Episode_time      | Time of the episode                                                               | Time     |                                                                                                                                             |
| Time_type         | Detail on how to interpret time (if available - AM/PM/Military)                   | Char 8   | AM<br>PM<br>Military                                                                                                                        |
| Therapy_type      | Type of treatment applied                                                         | Num 1    | 1=ATP<br>2=Shock<br>3=Not an Episode<br>4=Uncertain<br>5=Unresolved                                                                         |
| Shock_count       | Did episode include shocks?                                                       | Num 1    | 1=Yes, one shock<br>2=No<br>3=Yes, Multiple<br>4=Yes, Unsure of Count<br>5=Unresolved                                                       |
| Additional_shocks | If initial therapy was shock, did episode include additional shocks?              | Num 1    | 1=Yes 2=No 3=Unresolved                                                                                                                     |
| Local_prov        | Local provider's impression of treatment appropriateness                          | Num 1    | 1=Appropriate<br>2=Uncertain<br>3=Inappropriate<br>4=Unresolved                                                                             |
| Appropriate       | Reviewers impression of approariteness of treatment                               | Num 1    | 1=Definitely Appropriate<br>2=Probably Appropriate<br>3=Uncertain<br>4=Probably Inappropriate<br>5=Definitely Inappropriate<br>6=Unresolved |
| Successful        | If appropriate, was treatment successful?                                         | Num 1    | 1=Yes 2=No 3=Missing 4=Unresolved                                                                                                           |
| Cause             | If inappropriate, what was cause?                                                 | Num 1    | 1=SVT/AF<br>2=Sensing<br>3=Other<br>4=Unresolved                                                                                            |
| Untoward_Rhythm   | If inappropriate, did therapy cause untoward rhythm?                              | Num 1    | 1=Yes 2=No 3=Unresolved                                                                                                                     |
| Sufficient_Doc    | Was documentation sufficient to make a determination of appropriateness?          | Num 1    | 1=Yes by E-gram<br>2=No<br>3=Yes, by other clin. features<br>4=Yes, by local interp.<br>5=Unresolved                                        |
| Notes             | Comments on this treated episode                                                  | Char 255 |                                                                                                                                             |

Additional Implants

| Field Name  | Description                                                                       | Type    | Coding                                                |
|-------------|-----------------------------------------------------------------------------------|---------|-------------------------------------------------------|
| StudyID     | Subject-level Identifier, created at each site for the purpose of this study only | Num 8   |                                                       |
| implantdate | Implant date for new implant or updated previous implant                          | Date    |                                                       |
| enddate     | New or updated end date                                                           | Date    |                                                       |
| implantnum  | Implant number (may either be new/additional or overwrite a previous implant)     | 1-X     |                                                       |
| manuf       | ICD device manufacturer                                                           | Char 50 |                                                       |
| model       | ICD device model                                                                  | Char 50 |                                                       |
| modnum      | ICD device model number                                                           | Char 50 |                                                       |
| icdtype     | ICD device type                                                                   | Num 1   | 1=Single Chamber<br>2=Dual Chamber<br>3=Biventricular |

**Masoudi FA et al.**

**Appendix E: Therapy Abstraction Documents**

**-Guidelines**

**-Forms and Instructions**

**-Shipping transmittal log**

**-Intake quality checklist**

**-Request for additional data form**

# ICD Longitudinal Study - Therapy Collection

## Guidelines for Therapy Collection

### **GUIDELINES**

The goals of the therapy collection process at the study sites, and the role of the site abstractors, are:

1. Account for ICD interrogations covering the participant's follow-up period (from Date of Implant to End Date).
2. Identify the presence of any treated arrhythmic episodes during the participant's follow-up period.
3. Collect pertinent documentation to assist central reviewers and external adjudicators in determining the type, appropriateness, and outcome of the identified therapies.

### **Ascertaining Device Interrogations**

To ascertain a participant's complete set of device interrogations during their follow-up period, review of a wide range of data sources may be necessary. While there will be site-to-site variation, scheduled interrogations typically occur with some regularity, with a first interrogation shortly after implant and then follow-up visits perhaps every 3 months. Additional, unscheduled interrogations may occur following arrhythmic episodes resulting in ICD therapies.

Data archival may differ for each location conducting follow-up interrogations in your health system. Sources to consider for documenting all interrogations include:

- ICD clinic appointment schedules
- ICD clinic patient flow sheets
- ICD clinic interrogation files
  - archived paper reports
  - copies of electronic reports
  - device programmer interrogations archived on disks or flash drives
- ICD device manufacturer proprietary websites (for remote checks)
- Paceart reports or reports from comparable arrhythmia clinical management systems
- Operative reports
- History & physical reports
- Emergency room notes
- Hospital progress notes
- Cardiology consult notes
- Discharge/Expiration summaries
- Electronic Medical Record/Clinical notes, including encounter summaries, particularly for clinic visits following ER, inpatient, or out-of-system visits, or following unexpected gaps in interrogations

In addition, CPT procedure records with codes for ICD interrogation make a good starting point and likely identify a large proportion of a participant's known interrogations. Site data managers will be providing abstractors with a prefilled Participant Data Form containing, among other things, a list of dates corresponding to CPT codes associated with ICD checks (interrogations) occurring within or shortly after a participant's follow-up period. These dates provide clues to

# ICD Longitudinal Study - Therapy Collection

## Guidelines for Therapy Collection

the abstractor for when interrogation data is likely to be found. However CPT codes may miss some interrogations and therapies and so cannot be relied upon to exhaustively represent a complete list of interrogations.

CPT codes may do a particularly poor job of capturing interrogations occurring in inpatient settings, because of differences in billing. The Participant Data Form supplied by Site Data Managers will also include dates of inpatient hospitalization stays and emergency department visits occurring within or shortly after a participant's follow-up period. An approach to take following ER visit/hospitalizations is to pay particular attention to the next clinic visit to the participant's regular device follow-up provider, and examine whether any information was recorded that suggests the participant was interrogated or experienced a treated arrhythmic episode since that previous visit. Direct review of hospital/ER reports and notes may be necessary to determine if interrogations occurred and if any device therapies were present. For hospitalizations occurring after the last known interrogation, hospital records may be the only source of information about the potential occurrence of additional interrogations and presence of any ICD therapies.

Similarly, some patients may have a device interrogation, and may have experienced a treated arrhythmic episode, while away from the local area and/or through a provider outside of your health system. If there are clues to suggest that this has occurred, follow the approach described above for hospitalizations (although direct access to out of system records may not be possible).

In some instances, patients will receive follow-up testing done post-operatively that induces an arrhythmia for the purpose of testing ICD function. This type of testing will advance the counters and should be noted as such.

Another challenging situation you may come across is when a device is temporarily turned off during a surgery or another procedure and then turned on again after. Such an occurrence may cause the next interrogation report to only cover the period since the device was turned back on. Additional searching would be necessary to identify whether an interrogation report was obtained and archived for the period leading up to the surgery/procedure, and whether any treated episodes during that time had been noted.

When reviewing interrogation reports, it is important to be aware of **date ranges** provided on reports to ensure that the entire period of collection is accounted for. This will be helpful to suggest an interrogation may be missing if there is a gap in the coverage periods. You will be asked to identify any gaps in coverage, and to explain any periods of six months or greater between interrogations, such as if the participant was out of the service area and relevant documentation or comments from clinical notes are available. This may also help when considering the potential relevance of hospital/ER visits that may have occurred since the previous known interrogation. The date ranges will also be especially important when comparing clinic checks to remote (telephonic) checks as there may be duplication of information between the remote and clinic check device programmer reports. There may also be some historical data available on a remote check.

# ICD Longitudinal Study - Therapy Collection

## Guidelines for Therapy Collection

### **Identifying the Presence of ICD Treated Arrhythmic Episodes**

The device interrogation reports, especially when they include the electrograms and treated episode descriptions, are the definitive source for central reviewers. These reports provide very thorough detail of episodes that will assist the Central Review and Adjudication Panel in identifying appropriateness of therapy. The electronic medical record and arrhythmia clinical management systems, such as Medtronic's Paceart, may be additional sources to assist in identifying the presence of ICD treated episodes. Pacemaker/ICD clinics may also have their own flow sheets which could be an excellent resource when looking for therapy data.

A treated episode is when ATP (antitachycardia pacing) and/or shock are delivered in response to what the device senses to be an arrhythmia. A single treated episode may contain multiple ATPs and/or shocks. The presence of a treated episode can be found in several places on an interrogation report. Treated episodes are listed in a device "log" with dates and times. This log is an excellent source for determining the presence of treated episodes when available. Device specific report examples are provided in this document. (See Below).

For each subject, we will be collecting a maximum of 10 treated arrhythmic episodes. Also, if more than three treated episodes occurred within a 24 hour time period, we will not collect or count any episodes which occurred after the third episode within that 24 hour period. In such a situation, we will continue collection again (and counting toward the maximum of 10) with the next treated episode that occurs after that 24 hour period.

### **Collecting Documentation**

Requested documentation for **every participant** to support the central review of therapy collection will include the *implant surgery note* and the *last archived interrogation report and clinical note covering the follow-up period through the study end date or through the 10<sup>th</sup> treated episode*. These documents will also be valuable tools for the abstractor when completing the ICD Therapy Ascertainment Form and Interrogation Table. A key element within the surgery note is the presence and number of any test therapies, although the entire surgery note is requested. A key element within the last archived interrogation report is the cumulative device totals or device summary table, although the entire archived report is requested. Device totals, when available, support verification of therapy ascertainment. Device totals within interrogation reports can also help guide you when looking for therapies, but keep in mind, they may not be 100% complete or accurate. For example, therapy counters can be totally cleared due to power resets and follow-up testing shortly after implant will advance counters. Investigation through all interrogation dates needs to be performed.

For any **treated arrhythmic episodes**, requested documentation to support central review and adjudication includes:

- The *full interrogation report as archived or alternatively select and send the report components listed under Device Specific Report Examples below. Include the electrograms of the episode.*
- The *archived clinical note or other medical record source* containing the episode interpretation by the physician and/or nurse or other clinician.

# ICD Longitudinal Study - Therapy Collection

## Guidelines for Therapy Collection

### *EXAMPLES - Appendix A*

#### **Surgical Implant Note and Clinical Notes Examples**

Included in Appendix A are examples of a surgical implant note and clinical notes (one with therapies and one without therapies) from archived data.

#### **Paceart (Arrhythmia & Device Clinical Management System)**

The Medtronic Paceart system, if used in your clinics, can provide several different relevant reports. Licensing agreements may be needed for individuals to access this software, but reports from this system may also be available in the medical record. The **Patient (Comprehensive) Event Summary** provides a list of ICD clinic appointments with dates and comments and may be a resource for identifying therapies. The **Generic ICD Report (episodes)** provides details of a specific check with settings and a listing of episodes with dates, type of episode, treatment and success of treatment. Examples of these two reports are included in Appendix A for your information. Interrogation reports of these episodes can then be investigated further to verify therapies and obtain requested documentation.

Potential limitations of Paceart include: 1) the system may not be used comprehensively for all patients and all interrogations at your center; 2) not all devices are transferable into the Paceart system as soon as they are released for use - there may be a delay before your Paceart system is updated to accept data transfer for a new device; 3) Different devices transfer data with varying degrees of completeness; 4) Episode (therapy data) transfer wasn't always available in Paceart so this may not give a complete picture of all past therapies. You should work with your center's pacemaker/ICD clinic to see if/how Paceart can be of benefit.

#### **Device Specific Report Examples**

The following description of device-specific reports is intended to serve as a reference to support identification of therapies. Each of the companies may have different names and presentations for reports and therapies. Some reports may even have different names depending on if the check was done as a clinic check vs. a remote check. Reports may be available as combined or separate data even within the same manufacturer. This list is provided as a guide and not all reports will be available for each participant. See corresponding examples of these reports for each manufacturer in Appendix A.

#### **Boston Scientific** - *Look for VF, VT or VT1 episodes*

(Remote checks are done through the Latitude system - only the last check is stored for most devices during the study period. Changes have been made to the system to enhance storage of interrogations for newer devices - must have access to retrieve.)

- **Quick Notes** – This report gives a brief overview of the device and will tell if there are any new therapies.
- **Conversion Summary Report** – Will give device totals since last reset, as well as device totals for the life of the device.
- **Arrhythmia Log Report** – Can list as many as the last 250 episodes. (In Latitude, for some devices this may only go back 18 months. In clinic programmer checks this may go back further.)

# ICD Longitudinal Study - Therapy Collection

## Guidelines for Therapy Collection

- **Ventricular Tachy Counters** - Will give a brief summary of episodes since last reset and device totals, as well as attempted therapies. Episodes will be broken down into the number of zones programmed which could include one, two or three zones; VF, VT or VT1.
- **Episode Detail and Electrograms** – This report describes the detail of the episode for which either ATP and/or shocks were delivered and also includes the electrograms for each therapy. This report is the best source for episode identification and is what reviewers will use to determine appropriateness and effectiveness of therapy.
- **Device Follow-up Report or Combined Follow-up Report** – This is a combined report of the complete check but will include a listing of device totals. The Ventricular Tachy Counters are listed as “Since Last Reset” and “Device Totals.” The initial page of this report also lists “Events since last reset” (with the date of reset).
- **Parameters or Settings Report** – This report provides parameter and settings at the time of the interrogation.

### Medtronic - Look for VF, FVT and VT episodes

(Remote checks are done through the Carelink system – checks are stored indefinitely – must have access to retrieve.)

- **Quick Look Report or Initial Report** – This report gives a brief overview of the device and will tell if there are any new therapies since last interrogation. Older episodes are also available by doing a “complete” interrogation.
- **Full Summary Report** – This is a combined report of the complete check and includes the **episode counters** report and **episode lists** report. Counters Report-includes episodes since last session or last interrogation, since last cleared and device lifetime totals.
- **VT/VF Counters** – This report lists data from the prior session, last session and device lifetime totals. Episodes will be broken down into the number of zones programmed which could include one, two or three zones; VF, VFT and VT.
- **Arrhythmia Episode List** - This report includes a list of episodes since the last interrogation.
- **Episode Detail and Electrograms** – This report describes the detail of the episode for which either ATP and/or shocks were delivered and also includes the electrograms for each therapy. The report may include a plot of the heart rate, actual electrograms of the episode and a detailed description of the episode and is the best source for episode identification. Reviewers will use this report to determine appropriateness and effectiveness of therapy.
- **Parameters** – This report provides parameters and settings at the time of the interrogation.

### St. Jude Medical - Look for VF, VT1, or VT2 episodes

(Remote checks are done through the Merlin system - checks are stored indefinitely - must have access to retrieve.)

**Note: St. Jude device lifetime totals cannot be relied upon to give the total number of therapies. Device total may not include therapies treated with ATP and do include extra data used in device maintenance.** Data elements in St. Jude devices may also be retained in the programmer as archived data.



# ICD Longitudinal Study - Therapy Collection

## Guidelines for Therapy Collection

- **Fast Path Summary** – This is a combined report that includes the **Tachy Episode Summary** and **Tachy Episode Directory** which identifies episodes since last cleared. This report may also include parameters or settings.
- **Arrhythmia Episode List** - May also be called **VT/VF Episode Directory** and printed out as part of the FastPath Summary report. Episodes will be broken down into the number of zones programmed which could include one, two or three zones; VT1, VT2 or VF.
- **Tachy and Lifetime Diagnostic Report** – This report provides a Diagnostic Summary since last cleared, as well as Tachy & Lifetime Diagnostics.
- **Episode Detail and Electrograms** – This report describes the detail of the episode for which either ATP and/or shocks were delivered and also includes the electrograms for each therapy. This report is the best source for episode identification and is what reviewers will use to determine appropriateness and effectiveness of therapy.
- **Wrap-up Overview** – This is a combined report which may also include multiple other reports.
- **Parameters** – This report provides parameters and settings at the time of the interrogation.

### Manufacturer Resources:

Your local manufacturer representatives may be able to help assist you with report selection within the websites and programmers. In addition, the manufacturers' main company contact information is provided below.

|                                                                                                                                                                                |                                                                                                                                                        |                                                                                            |
|--------------------------------------------------------------------------------------------------------------------------------------------------------------------------------|--------------------------------------------------------------------------------------------------------------------------------------------------------|--------------------------------------------------------------------------------------------|
| BOSTON SCIENTIFIC/GUIDANT<br>TECH SERVICES and Latitude Tech<br>Services<br>1-800-CAR-DIAC<br>1-800-227-3422<br><br>Latitude<br>1-800-CAR-DIAC and ask for<br>Latitude support | MEDTRONIC TECH SERVICES<br>1-800-505-4636 brady<br>1-800-723-4636 tachy<br><br>Carelink<br>1-800-929-4043<br><br>PACEART-----1-800-PACEART<br>Option 1 | ST. JUDE TECH SERVICES<br>1-800-PAC-EICD<br>1-800-722-3774<br><br>Merlin<br>1-877-696-3754 |
|--------------------------------------------------------------------------------------------------------------------------------------------------------------------------------|--------------------------------------------------------------------------------------------------------------------------------------------------------|--------------------------------------------------------------------------------------------|

### Personal Direct and Indirect Identifiers

To assist abstractors in removing personal identifying information from reports being sent to Marshfield, a list of specific HIPAA Direct Identifiers is included below. Marshfield Clinic Research Foundation has Data Use Agreements (DUAs) with each of the sites participating in data collection. The DUAs permit sharing of a limited data set for the purposes of this study, and this includes sharing of dates on the reports or the forms you complete. Redacting names of facilities and physicians/providers is at the discretion of the submitting site. Please take extra care to review documents prior to sending to Marshfield to ensure all Direct Identifiers of participants have been removed.

Also, please note that the example reports attached to this Guidelines document have been taken a step further and completely deidentified, including removal of all participant-relevant dates. This was necessary because Marshfield Clinic Research Foundation does not have DUAs in place **\*\*as the data contributor\*\*** to each study site.

# ICD Longitudinal Study - Therapy Collection

## Guidelines for Therapy Collection

| <b>Direct Identifiers (Not Allowed)</b>                                                                                                                                                                                                                                                                                                                                                            |                                                                                                                                                                                                                                                                                                                                                                                                                                                                                                        |
|----------------------------------------------------------------------------------------------------------------------------------------------------------------------------------------------------------------------------------------------------------------------------------------------------------------------------------------------------------------------------------------------------|--------------------------------------------------------------------------------------------------------------------------------------------------------------------------------------------------------------------------------------------------------------------------------------------------------------------------------------------------------------------------------------------------------------------------------------------------------------------------------------------------------|
| <ul style="list-style-type: none"><li>• Name</li><li>• Postal address</li><li>• Phone number</li><li>• Fax number</li><li>• Email</li><li>• Social security number</li><li>• Health plan numbers</li><li>• Account numbers</li><li>• Certificate/license number/vehicle identifiers &amp; serial numbers, including license plate numbers</li><li>• Device identifiers and serial number</li></ul> | <ul style="list-style-type: none"><li>• A unique identifying number, characteristic or code (<b>Note:</b> a code is not considered an identifier if it is not derived from or related to information about the individual and is not otherwise capable of being translated so as to identify the individual)</li><li>• URL</li><li>• IP address numbers</li><li>• Biometric identifiers, including finger and voice points</li><li>• Full face photographic images and any comparable images</li></ul> |

### **Shipping Completed Forms and Documentation to the Coordinating Center (Marshfield)**

- Completed Therapy Collection Forms and documentation should be shipped to the Coordinating Center on your identified ship date (see Therapy Collection Shipping Schedule) with a Documentation Transmittal Log. On the transmittal log, list the Study ID number for each chart that is being shipped.
- Transmittal logs should be reviewed against the actual hard copy forms. The original transmittal logs should accompany the shipment. A copy of each transmittal log should be kept on file at the site.
- All documentation should be photocopied prior to shipment. The site will keep the copies on file and ship the originals. Forms should be organized for shipment in the same order in which they appear on the transmittal.
- Collection forms and documentation should be shipped to the Coordinating Center (Deb Multerer, 1000 N. Oak Avenue – ML-3, Marshfield, WI 54449) via Federal Express or similar secure and traceable shipment. A copy of the transmittal should also be faxed to Deb Multerer at 715-389-3535 on the day of the shipment.

**ICD LONGITUDINAL STUDY - THERAPY COLLECTION**  
**PARTICIPANT IDENTIFICATION COVER PAGE - Version 01/28/2011**

Site Data Manager to supply prefilled form for each subject to assist abstractor in identification.  
Do not include with shipment to Coordinating Center.

**STUDY ID No.** \_\_\_\_\_ **Date of Implant** \_\_\_\_\_ (from NCDR Registry)

**Local Identifying Information – Do Not Send This Page to Coordinating Center at Marshfield**

**Medical Record No.** \_\_\_\_\_

**Date of Birth** \_\_\_\_\_

**Gender** \_\_\_\_\_

*The site data manager can chose to add other identifying variables needed to support abstraction on this form or else supply them to the abstractor through other means (e.g., local ID numbers, name, etc.).*

**ICD LONGITUDINAL STUDY - THERAPY COLLECTION**  
**PARTICIPANT DATA FORM - Version 01/28/2011**

Site Data Manager to supply prefilled form for each subject before abstraction  
Include with Shipment to Coordinating Center.

- **STUDY ID No.** \_\_\_\_\_
  
- 1<sup>st</sup> Implant Date \_\_\_\_\_
- 1<sup>st</sup> Device Manufacturer/Model Name/Model Number \_\_\_\_\_
- 1<sup>st</sup> ICD Device Type (from NCDR Registry): \_\_\_\_\_
  
- 2<sup>nd</sup> Implant Date \_\_\_\_\_
- 2<sup>nd</sup> Device Mfr/Model Name/Number \_\_\_\_\_
- 2<sup>nd</sup> ICD Device Type \_\_\_\_\_
  
- 3<sup>rd</sup> Implant Date \_\_\_\_\_
- 3<sup>rd</sup> Device Mfr/Model Name/Number \_\_\_\_\_
- 3<sup>rd</sup> ICD Device Type \_\_\_\_\_
  
- End Date: \_\_\_\_\_ (calculated from NCDR registry implant date—defined as 3 years post implant [2 years for 2009 implants])
  
- List of dates of ICD Interrogation CPT codes for the period from Date of Implant to the first occurrence of an ICD Interrogation CPT code after End Date (from VDW)  
\_\_\_\_\_  
\_\_\_\_\_  
\_\_\_\_\_
  
- List of dates of inpatient hospital stays for the period from Date of Implant to the first occurrence of hospitalization after End Date (from VDW)  
\_\_\_\_\_
  
- List of dates of Emergency Department visits for the period from Date of Implant to the first occurrence of an ER visit after End Date (from VDW)  
\_\_\_\_\_

ICD LONGITUDINAL STUDY – THERAPY COLLECTION  
**ICD THERAPY ASCERTAINMENT FORM with INTERROGATION TABLE**

Site Abstractor to complete one form for each participant, after receiving Participant Data Form from site data manager.

**PART A. Site Abstractor to Complete.**

1. **STUDY ID No.** \_\_\_\_\_ 2. **Abstractor ID No.** \_\_\_\_\_ 3. **Date of Abstraction:** \_\_\_\_/\_\_\_\_/\_\_\_\_  
Mo/Day/Year

4. **Is there evidence in the medical record that ICD on Date of Implant was not the participant's first ICD?**

\_\_\_\_ Yes → Enter date of prior ICD implant \_\_\_\_/\_\_\_\_/\_\_\_\_ (Stop abstraction if prior to 2006)  
\_\_\_\_ No (Continue to Part B.) Mo/Day/Year

5. **Enter date of death, if any, found in the medical record →** \_\_\_\_/\_\_\_\_/\_\_\_\_ (Continue to Part B.)  
Mo/Day/Year

**PART B. Interrogation Table (separate page) - Site Abstractor to complete.**

Complete the Interrogation Table by documenting device interrogations covering the period from the Date of Implant through the End Date provided on the Participant Data Form. Complete each row in its entirety for each interrogation noted.

**PART C. Site Abstractor to Complete, after Part B (Interrogation Table).**

1. **Was participant followed through End Date supplied on Participant Data Form?**

\_\_\_\_ Yes

\_\_\_\_ No (Indicate reason, based on abstraction findings)

\_\_\_\_ Death before End Date → Death Date (from record abstraction) \_\_\_\_/\_\_\_\_/\_\_\_\_  
Mo/Day/Year

\_\_\_\_ Device turned off permanently or explanted before End Date → Date \_\_\_\_/\_\_\_\_/\_\_\_\_  
Mo/Day/Year

\_\_\_\_ Participant transferred care before End Date → Date transferred \_\_\_\_/\_\_\_\_/\_\_\_\_  
Mo/Day/Year

\_\_\_\_ 10 treated episodes before End Date → Date of 10<sup>th</sup> episode \_\_\_\_/\_\_\_\_/\_\_\_\_  
Mo/Day/Year

\_\_\_\_ Other → Specify \_\_\_\_\_ → Date last followed \_\_\_\_/\_\_\_\_/\_\_\_\_  
Mo/Day/Year

2. **Copy source documents, remove direct participant identifiers, and include with this form:**

a. **Implant surgery note (from the Date of Implant.) - Attached?**

\_\_\_\_ Yes

\_\_\_\_ No → Reason \_\_\_\_\_

b. **Device Interrogation Report and Clinical Note(s) from last interrogation\* -- Attached?**

\_\_\_\_ Yes → Date of Interrogation Report \_\_\_\_/\_\_\_\_/\_\_\_\_  
Mo/Day/Year

\_\_\_\_ No → Reason \_\_\_\_\_

\_\_\_\_ Yes → Date of Clinical Note \_\_\_\_/\_\_\_\_/\_\_\_\_  
Mo/Day/Year

\_\_\_\_ No → Reason \_\_\_\_\_

*Send the entire interrogation report as archived or alternatively select and send just the following report components. Also, if you need to generate a new report printout from the web or electronic programmer archive, these are the reports of interest that may be available by manufacturer and should be included.*  
*Boston Scientific: Quick Notes, Conversion Summary Report, Arrhythmia Log, Ventricular Tachy Counters, Episode Detail, Device Follow-up Report or Combined Follow-up Report, Parameters or Settings Report*  
*Medtronic: Quick Look Report or Initial Report, Full Summary, VT/VF Counters, Arrhythmia Episode List, Episode Detail and Electrograms, Parameters*  
*St. Jude: Fast Path Summary, Tachy Episode Summary, Tachy Episode Directory, Arrhythmia Episode List, VT/VF Episode Directory, Tachy and Lifetime Diagnostic Report, Episode Detail and Electrograms, Wrap-up Overview, Parameters*

*\*If the last interrogation has no device report or clinical note archived, work backward until the last available device report or clinical note is found, ensuring entire study period is covered.*

*\*If follow-up was stopped with the 10<sup>th</sup> treated episode, the device report and clinical note from that corresponding interrogation should be sent rather than seeking out the last interrogation in the original follow-up period.*

3. **If the participant received any ICD therapies from the Date of Implant through the End Date, complete an ICD Treated Episode Cover Page for each treated arrhythmic episode.**

4. **Assemble the following forms and documents for submission – Participant Data Form, Ascertainment Form with Interrogation Table, Implant Surgery Note, Interrogation Report and Clinical Interpretation Note(s) from last interrogation (OR 10<sup>th</sup> treated episode) and an ICD Treated Episode Cover Page with corresponding source documents (device interrogation report, electrocardiograms, clinical note(s) with interpretation of episode) for each treated arrhythmic episode.**

**ICD THERAPY ASCERTAINMENT INTERROGATION TABLE**

Site abstractor to complete for device interrogations occurring during the participants follow-up period

**PART B. Interrogation Table:** Complete each row in its entirety. Begin with the first device interrogation on or after the Date of Implant. Complete a row for each interrogation occurring through the End Date or to the 10th treated episode. It may be necessary to go to the next interrogation after the End Date to cover entire follow-up period. Note the presence and dates of any arrhythmic episodes requiring device therapies. Add comments as needed.

1. Study ID No. \_\_\_\_\_ 2. Date of Implant \_\_\_\_\_ / \_\_\_\_\_ / \_\_\_\_\_ Mo/Day/Year  
 3. End Date \_\_\_\_\_ / \_\_\_\_\_ / \_\_\_\_\_ Mo/Day/Year

| Interrogation Date<br>mm/dd/yyyy | Type of Check<br>C-Clinic<br>R-Remote<br>H-Hospital<br>O-Other (Specify) | Device Interrogation Report Available?<br>Y/N | Cumulative Device Totals Available in Report?<br>Y/N | Clinical Note Available?<br>Y/N | Remote Data Available?<br>Y/N/NA | Any Treated Episodes?<br>Y/N/Unkn | Date(s) of Episode(s) Requiring Therapy<br>mm/dd/yyyy; mm/dd/yyyy; mm/dd/yyyy;<br>etc. | Comments |
|----------------------------------|--------------------------------------------------------------------------|-----------------------------------------------|------------------------------------------------------|---------------------------------|----------------------------------|-----------------------------------|----------------------------------------------------------------------------------------|----------|
|                                  |                                                                          |                                               |                                                      |                                 |                                  |                                   |                                                                                        |          |
|                                  |                                                                          |                                               |                                                      |                                 |                                  |                                   |                                                                                        |          |
|                                  |                                                                          |                                               |                                                      |                                 |                                  |                                   |                                                                                        |          |
|                                  |                                                                          |                                               |                                                      |                                 |                                  |                                   |                                                                                        |          |
|                                  |                                                                          |                                               |                                                      |                                 |                                  |                                   |                                                                                        |          |
|                                  |                                                                          |                                               |                                                      |                                 |                                  |                                   |                                                                                        |          |
|                                  |                                                                          |                                               |                                                      |                                 |                                  |                                   |                                                                                        |          |
|                                  |                                                                          |                                               |                                                      |                                 |                                  |                                   |                                                                                        |          |
|                                  |                                                                          |                                               |                                                      |                                 |                                  |                                   |                                                                                        |          |
|                                  |                                                                          |                                               |                                                      |                                 |                                  |                                   |                                                                                        |          |
|                                  |                                                                          |                                               |                                                      |                                 |                                  |                                   |                                                                                        |          |
|                                  |                                                                          |                                               |                                                      |                                 |                                  |                                   |                                                                                        |          |
|                                  |                                                                          |                                               |                                                      |                                 |                                  |                                   |                                                                                        |          |
|                                  |                                                                          |                                               |                                                      |                                 |                                  |                                   |                                                                                        |          |
|                                  |                                                                          |                                               |                                                      |                                 |                                  |                                   |                                                                                        |          |

☐ Gaps in follow-up were identified between interrogations. Explain: \_\_\_\_\_

**ICD THERAPY ASCERTAINMENT INTERROGATION TABLE**

Site abstractor to complete for device interrogations occurring during the participants follow-up period

**Additional Sheet**

1. Study ID No. \_\_\_\_\_ 2. Date of Implant \_\_\_\_ / \_\_\_\_ / \_\_\_\_ Mo/Day/Year  
 3. End Date \_\_\_\_ / \_\_\_\_ / \_\_\_\_ Mo/Day/Year

| Interrogation Date<br><i>mm/dd/yyyy</i> | Type of Check<br><i>C-Clinic<br/>R-Remote<br/>H-Hospital<br/>O-Other (Specify)</i> | Device Interrogation Report Available?<br><i>Y/N</i> | Cumulative Device Totals Available in Report?<br><i>Y/N</i> | Clinical Note Available?<br><i>Y/N</i> | Remote Data Available?<br><i>Y/N/NA</i> | Any Treated Episodes?<br><i>Y/N/Unkn</i> | Date(s) of Episode(s) Requiring Therapy<br><i>mm/dd/yyyy, mm/dd/yyyy, mm/dd/yyyy, etc.</i> | Comments |
|-----------------------------------------|------------------------------------------------------------------------------------|------------------------------------------------------|-------------------------------------------------------------|----------------------------------------|-----------------------------------------|------------------------------------------|--------------------------------------------------------------------------------------------|----------|
|                                         |                                                                                    |                                                      |                                                             |                                        |                                         |                                          |                                                                                            |          |
|                                         |                                                                                    |                                                      |                                                             |                                        |                                         |                                          |                                                                                            |          |
|                                         |                                                                                    |                                                      |                                                             |                                        |                                         |                                          |                                                                                            |          |
|                                         |                                                                                    |                                                      |                                                             |                                        |                                         |                                          |                                                                                            |          |
|                                         |                                                                                    |                                                      |                                                             |                                        |                                         |                                          |                                                                                            |          |
|                                         |                                                                                    |                                                      |                                                             |                                        |                                         |                                          |                                                                                            |          |
|                                         |                                                                                    |                                                      |                                                             |                                        |                                         |                                          |                                                                                            |          |
|                                         |                                                                                    |                                                      |                                                             |                                        |                                         |                                          |                                                                                            |          |
|                                         |                                                                                    |                                                      |                                                             |                                        |                                         |                                          |                                                                                            |          |
|                                         |                                                                                    |                                                      |                                                             |                                        |                                         |                                          |                                                                                            |          |

 Gaps in follow-up were identified between interrogations. Explain: \_\_\_\_\_

ICD TREATED EPISODE COVER PAGE

Site Abstractor to complete a cover page for each treated arrhythmic episode. For each subject, collect a maximum of 10 treated arrhythmic episodes. Also, if more than three treated episodes occurred within a 24 hour time period, do not collect or count any episodes which occurred after the third episode within that 24 hour period. In such a situation, continue collection again (and counting toward 10) with the next treated episode that occurs after that 24 hour period.

1. STUDY ID No. \_\_\_\_\_ 2. Abstractor ID No. \_\_\_\_\_

3. Interrogation Date: \_\_\_\_/\_\_\_\_/\_\_\_\_ 4. Treated Episode # \_\_\_\_\_  
Mo/Day/Year (To be completed by Marshfield)

5. Date of treated arrhythmic episode: \_\_\_\_/\_\_\_\_/\_\_\_\_  
Mo/Day/Year

6. Time of treated arrhythmic episode: \_\_\_\_:\_\_\_\_:\_\_\_\_ AM/PM/Military  
Hour:min:sec

7. Is this the third treated episode within a 24 hour time period? \_\_\_\_ Yes \_\_\_\_ No

8. *For this arrhythmic episode, obtain and attach copies of the device interrogation report, electrocardiograms, and the clinical note(s) containing the interpretations of the episode and the resulting therapy. Be sure to remove any direct identifiers.*

*Indicate below whether requested documents are attached and any explanation for missing documents.*

a. **Device Interrogation Report - Attached?** *Send the entire interrogation report as archived or alternatively select and send just the following report components. If you need to generate a new report printout from the web or electronic programmer archive, these are the reports of interest that may be available by manufacturer and should be included. See Guidelines document for specific examples of these reports:*

*Boston Scientific: Quick Notes, Conversion Summary Report, Arrhythmia Log, Ventricular Tachy Counters, Episode Detail, Device Follow-up Report or Combined Follow-up Report, Parameters or Settings Report  
 Medtronic: Quick Look Report or Initial Report, Full Summary, VT/VF Counters, Arrhythmia Episode List, Episode Detail and Electrograms, Parameters  
 St. Jude: Fast Path Summary, Tachy Episode Summary, Tachy Episode Directory, Arrhythmia Episode List, VT/VF Episode Directory, Tachy and Lifetime Diagnostic Report, Episode Detail and Electrograms, Wrap-up Overview, Parameters*

\_\_\_\_ Yes

\_\_\_\_ No → Explanation \_\_\_\_\_

b. **Electrocardiograms - Attached?** *(From device interrogation report)*

\_\_\_\_ Yes

\_\_\_\_ No → Explanation \_\_\_\_\_

c. **Clinical Note(s) with Interpretation of Arrhythmic Episode/Therapy - Attached?**  
*(EMR notes, Paceart report, device clinic flow sheet)*

\_\_\_\_ Yes

\_\_\_\_ No → Explanation \_\_\_\_\_

9. Episode Comments \_\_\_\_\_



## Instructions for Completing ICD Therapy Ascertainment Form, ICD Therapy Ascertainment Interrogation Table and the ICD Treated Episode Cover Page

### ICD PARTICIPANT IDENTIFICATION COVER PAGE

Identifiers from the VDW needed locally to facilitate abstraction (e.g. MRN, date of birth, gender) will be prefilled on a separate tear-off sheet, known as the Participant Identification Cover Page. This page will be prefilled by the site data manager and supplied to the site abstractor. This page and any other direct identifiers supplied locally by the site data manager to support abstraction (e.g. name, etc.) should not be included in the materials sent to the Coordinating Center in Marshfield.

### ICD PARTICIPANT DATA FORM

For each patient selected for the ICD Longitudinal Study Therapy Collection, the site data manager will provide an ICD Participant Data Form prefilled with the following information. This form should be included in the submission to Marshfield.

- Unique Study ID Number
- Date of Implant (from NCDR registry)
- Device Manufacturer/Model Name/Model Number (from NCDR registry)
- ICD Type (from NCDR registry)
- Dates of any subsequent ICD Implant Records after Date of Implant (from NCDR registry)
- End Date (calculated from NCDR registry implant date); defined as: 3 years post implant [2 years for 2009 implants]
- List of dates of possible interrogations from Date of Implant through End Date as determined by CPT codes (from VDW).
- List of dates of inpatient hospital stays from Date of Implant through End Date (from VDW).
- List of dates of Emergency Department visits from Date of Implant through End Date (from VDW).

### ICD THERAPY ASCERTAINMENT FORM WITH INTERROGATION TABLE

#### Part A. Site Abstractor to Complete.

1. **Study ID No.** Enter the Unique Study ID No. from the Participant Data Form. Include the site ID number as part of the number, i.e. 113-00025.
2. **Abstractor ID No.** Enter your abstractor ID number.
3. **Date of Abstraction.** Enter date of abstraction.
4. **Is there evidence in the medical record that ICD on Date of Implant was not the participant's first ICD?** While the study is taking steps to assure that the ICD identified by the NCDR registry is the participant's first ICD, it is possible that some members of the eligible cohort will have evidence of a prior ICD implant in the medical record. In such a situation, if the date of the earlier ICD implant is prior to

## **Instructions for Completing ICD Therapy Ascertainment Form, ICD Therapy Ascertainment Interrogation Table and the ICD Treated Episode Cover Page**

01/01/2006 or if the implant was performed outside of your health system, indicate this, enter date of prior ICD implant and **STOP** the abstraction at this point. Provide a copy of the implant note if available with the Ascertainment Form in your next shipment. If the prior implant date is within the study period (01/01/2006-12/31/2009), and the implant was performed within your health system, please enter the date of the prior implant, and continue abstraction with Part B. Include all implant notes in documentation. If No, continue to Part B.

5. **Enter date of death, if any, found in the medical record.** If the participant is deceased according to the medical record, enter the date of death and continue abstraction through the entire study period or up to the date of death, whichever comes first. This date may be after the study period in which case you would abstract through the end date provided on the Participant Data Form. If the participant is not deceased, leave blank and continue to Part B.

### Part B. Interrogation Table.

1. **Study ID No.** Enter the Unique Study ID No. from the participant Data Form. Include the site ID number as part of the number, i.e. 113-00025.
2. **Date of Implant.** Enter the Date of Implant from the Participant Data Form.
3. **End Date.** Enter the End Date from the Participant Data Form. Do not change the End Date. You will have the opportunity in Part C to indicate whether and why a subject could not be followed to their predetermined End Date.
4. **Complete the Interrogation Table.** This will assist in the site's systematic ascertainment and will provide central reviewers with an understanding of what documentation is available and how this interrogation relates to other occurrences. Using the supplied Guidelines for Therapy Collection document as a reference, ascertain ICD interrogations and identify any treated arrhythmic episodes by listing the interrogations and corresponding data in chronological order. The dates of possible interrogations determined by CPT codes, the dates of inpatient hospital stays and the dates of Emergency Department visits provided on the Participant Data Form will help guide you. Please start with the earliest interrogation on or after the Date of Implant, and end with the first interrogation occurring on or after the End Date. Record the presence of any treated episodes occurring on or before the End Date, but not after the End Date. If you find evidence of a treated episode without having the formal documentation that an interrogation occurred, indicate the presence of the treated episode and complete the row as best you can. Do not leave any data elements blank. Completing each requested data element identifies that the record was reviewed and what type of information you used to determine if treated episodes occurred. Use the comment section to provide the Coordinating Center with information you feel will assist reviewers in understanding the data collection. Requested table elements include:

## **Instructions for Completing ICD Therapy Ascertainment Form, ICD Therapy Ascertainment Interrogation Table and the ICD Treated Episode Cover Page**

- **Interrogation Date** – enter date of device interrogation (one date per row). Note that a device check performed for testing that may have been done following implant should be considered an interrogation and entered on the form. Even though the test was not a spontaneously occurring arrhythmic episode, it will advance counters, and so noting this information will be important to the reviewers for assessing completeness of data capture.
- **Type of Interrogation** (C-Clinic, R-Remote, H-Hospital, O-Other-Specify) – determine what type of interrogation took place and enter corresponding letter.
- **Device Interrogation Report Available?** - If entire or partial Device Interrogation Report is available to assist you in determining whether or not there was a treated arrhythmic episode enter Y. If there is no Device Report available enter N. (Device specific report examples by manufacturer are available in the Guidelines for Therapy Collection document.)
- **Cumulative Device Totals Available in Report?** – If Cumulative Device Totals are included in the Device Interrogation Report, enter Y. If not, enter N. (Abstractor may also note the actual device totals number in this column if it assists them in determining if additional therapies occurred.)
- **Clinical Note Available?** – Indicate the availability of a clinical note with interpretation or other medical record sources that assisted you in determining whether or not there was a treated arrhythmic episode. Clinical notes may include Paceart reports or other local documents (see Guidelines for Therapy Collection document for additional information).
- **Remote Data Available?** – If Type of Check was R-Remote, check the manufacturer’s website for additional interrogation data. Enter Y/N/NA (not applicable for non-remote checks) accordingly. Specific websites per manufacturer are listed in the Guidelines for Therapy Collection document. If you entered N (No), explain reason for not checking the website in the comment field.
- **Any Treated Episodes?** – Indicate whether a treated episode occurred during this interrogation period. If treated episode is present, enter Y and continue row. If there were no treated episodes, enter N or Unkn, complete comments field if necessary and continue to next interrogation date. Please recall that both shocks and anti-tachycardia pacing (ATP) qualify as ICD treatment for arrhythmic episodes. Please refer to Guidelines for Therapy Collection document and device-specific report examples to help identify presence and number of treated arrhythmic episodes. An aborted therapy should also be considered a treated episode for purposes of this study and documentation should be collected.

## **Instructions for Completing ICD Therapy Ascertainment Form, ICD Therapy Ascertainment Interrogation Table and the ICD Treated Episode Cover Page**

- **Date(s) of Episode(s) Requiring Therapy** – If treated episode(s) occurred, enter the date of each treated arrhythmic episode captured by this interrogation. Do not collect more than three treated episodes within a 24 hour period. Continue abstraction of additional treated episodes within that interrogation. In addition, please note in the comments field if abstraction was stopped after three treated episodes. Providing comments for this will help the Coordinating Center understand the progression of events and why counters may vary.
- **Comments** – Enter any comments for the interrogation you feel will assist the Coordinating Center.

*Note: Abstractors should collect up to the first 10 treated episodes per subject. However, collect (and count towards those 10) no more than three treated episodes within any 24 hour period. In such a situation, continue collection (and counting again toward the 10) with the next treated episode that occurs after that 24 hour period. If you reach 10 total treated episodes using this approach, you should STOP data collection. The documentation for the 10<sup>th</sup> episode becomes the final interrogation. Otherwise, continue abstraction until you review the last interrogation covering any of the period between the implant and End Date.*

**Gaps in follow-up were identified between interrogations:** If there are identified lapses in coverage during the follow-up period or if there are gaps between interrogations of six months or greater, check the box at bottom of the page and provide an explanation. See Guidelines for Therapy Collection document for additional information.

**Additional Comments.** Enter any additional comments that will assist Coordinating Center.

**Page Number.** Additional pages may be necessary to record all interrogations. Additional Interrogation Table sheets can be added as necessary. Enter the page number for each additional page.

When the interrogation table is complete, go to Part C. on Ascertainment Form.

### **Part C. Site Abstractor to Complete, after Part B (Interrogation Table).**

#### **1. Was participant followed through End Date supplied on Participant Data Form?**

If during your abstraction, you determine that the subject's clinical follow-up for device interrogations and treated episodes did not last up to their anticipated End Date, indicate this, the explanation, and the relevant date, including: death before End Date, device permanently turned off or explanted before End Date, care transferred outside the health system before the End Date, 10 treated episodes before End Date, or Other and specify reason.

**Instructions for Completing ICD Therapy Ascertainment Form, ICD Therapy Ascertainment Interrogation Table and the ICD Treated Episode Cover Page**

2. **Copy source documents, remove direct participant identifiers and include with this form.** In this section, for all subjects, you are asked to provide a copy of the implant surgery note and the last device interrogation report and clinical notes. If you are unable to provide the information, check the appropriate box and provide an explanation. More information regarding documentation is provided in the Guidelines for Therapy Collection document.
3. **If the participant received any ICD therapies from the Date of Implant through the End Date, complete an ICD Treated Episode Cover Page for each treated arrhythmic episode.** Follow instructions provided below (and on the Cover Page itself).
4. **Assemble the forms and documents for submission as listed.**

**ICD TREATED EPISODE COVER PAGE**

Complete an ICD Treated Episode Cover Page for each treated episode (arrhythmic event leading to therapy). Please note there may be multiple treated episodes captured per interrogation. Also, each treated episode may have resulted in more than one therapy, including one or more ATP and/or one or more shocks, but the unit of observation in this study is the treated arrhythmic episode. **Note: If more than three treated episodes occurred within a 24 hour time period, do not count or complete an ICD Treated Episode Cover Page for any episodes which occurred after the third episode within that 24 hour period. In such a situation, continue collection again (and counting toward the 10 maximum treated episodes) with the next treated episode that occurs after that 24 hour period.**

1. **STUDY ID No.** Enter the Study ID No. supplied on Participant Data Form.
2. **Abstractor ID No.** Enter your ID number.
3. **Interrogation Date:** Enter the date of the Interrogation from the Interrogation Table.
4. **Treated Episode #:** Please leave blank. This will be completed by Marshfield.
5. **Date of treated arrhythmic episode:** Enter the date of the treated arrhythmic episode.
6. **Time of treated arrhythmic episode:** Enter time of arrhythmic episode. Circle AM/PM/Military if known.
7. **Is this the third treated episode within a 24 hour time period?** Answer Yes or No.

**Instructions for Completing ICD Therapy Ascertainment Form, ICD Therapy Ascertainment Interrogation Table and the ICD Treated Episode Cover Page**

8. **Source documentation:** Attach source documentation of the treated episode. Indicate which reports are available by checking Yes or No. If reports are not available provide an explanation. Include the following:
- a. Device Interrogation Reports
  - b. Electrocardiograms
  - c. Clinical Notes with Interpretation of Arrhythmic Episode/Therapy. The local provider's interpretation and other archived clinical information about the episode are critical elements to support an accurate central review and adjudication process, especially for situations where the formal device report and electrograms are missing.

Note reasons for missing or partially missing source documentation. See Guidelines for Therapy Collection for additional information.

9. **Episode Comments.** Enter any comments you feel will be of assistance to the Coordinating Center.

ICD Longitudinal Study – Therapy Collection

**DOCUMENTATION TRANSMITTAL LOG**

**Please complete this transmittal log for ICD Participant Forms and Documentation that are currently being shipped to Marshfield. Keep a copy of this log at your site for your records and fax a copy to Deb Multerer at 715-389-3535.**

**Please ship charts with a copy of this transmittal log to:**

**Deb Multerer  
ICD Study Manager  
Marshfield Clinic Research Foundation  
1000 North Oak Avenue – ML3  
Marshfield, WI 54449  
Ph: 715-389-3108**

Site ID: \_\_\_\_\_

Date sent to Marshfield: \_\_\_\_\_

| Study ID Number |
|-----------------|
|                 |
|                 |
|                 |
|                 |
|                 |
|                 |
|                 |
|                 |
|                 |
|                 |
|                 |
|                 |
|                 |
|                 |
|                 |
|                 |
|                 |
|                 |
|                 |
|                 |
|                 |

| Study ID Number |
|-----------------|
|                 |
|                 |
|                 |
|                 |
|                 |
|                 |
|                 |
|                 |
|                 |
|                 |
|                 |
|                 |
|                 |
|                 |
|                 |
|                 |
|                 |
|                 |
|                 |
|                 |
|                 |

Quality Assurance Chart Review Checklist

Study ID No. \_\_\_\_\_

Abstractor ID No. \_\_\_\_\_

**ICD Therapy Ascertainment Form with Interrogation Table (page 1)**

- \_\_\_\_\_ Part A. items 1-5 complete.
- \_\_\_\_\_ Part B. Interrogation Table is included.
- \_\_\_\_\_ Part C. item 1. is complete.
- \_\_\_\_\_ Part C. item 2. is complete.
  - \_\_\_\_\_ a. Implant note included or explanation provided if not.
  - \_\_\_\_\_ b. Last device interrogation/clinic note reports included or explanation provided.

**Interrogation Table**

- \_\_\_\_\_ Part B. Interrogation Table items 1-3 completed. End date matches.
- \_\_\_\_\_ Interrogation dates match dates provided on ICD Participant Data Form.
- \_\_\_\_\_ Rows are complete for each interrogation date.
- \_\_\_\_\_ Gaps of 6 months or greater are explained.
- \_\_\_\_\_ If Type of Check is Remote – Remote Data Available box is completed.
- \_\_\_\_\_ If Treated Episodes reported on table – A Treated Episode Cover Page with documentation is included. [ENTER # OF TREATED EPISODES AT BOTTOM OF TABLE]
- \_\_\_\_\_ Date of Last interrogation report or 10<sup>th</sup> Treated Episode matches information provided on page 1, part 2.b.

**Treated Episode Cover Page(s)**

- \_\_\_\_\_ Treated episode cover page(s) and documentation provided for each treated arrhythmic episode.
- \_\_\_\_\_ Form is complete; all items completed
- \_\_\_\_\_ Device interrogation reports are attached or explanation is provided.
- \_\_\_\_\_ Electrocardiograms are attached or explanation is provided.
- \_\_\_\_\_ Clinical notes with interpretation of episode are attached or explanation provided.

**All**

- \_\_\_\_\_ All forms assembled as instructed.
- \_\_\_\_\_ Reports are deidentified; PHI redacted.
- \_\_\_\_\_ Comments are legible



**ICD Longitudinal Study**

**Request for Additional Documentation**

Study ID No: \_\_\_\_\_

Abstractor ID No: \_\_\_\_\_

Date of Request: \_\_\_\_\_

| Documentation Requested | Included?<br>Y/N/NA | Site Comments |
|-------------------------|---------------------|---------------|
|                         |                     |               |
|                         |                     |               |
|                         |                     |               |
|                         |                     |               |
|                         |                     |               |
|                         |                     |               |

Date of Response: \_\_\_\_\_

**Fax or mail response with additional documentation if available to:**

Deb Multerer  
ICD Study Manager  
Marshfield Clinic Research Foundation  
1000 North Oak Avenue – ML3  
Marshfield, WI 54449  
Ph: 715-389-3108  
Fax: 715-389-3535

**Masoudi FA et al.**

**Appendix F: Therapy Adjudication Documents**

**-Glossary**

**-Central Review Form and Instructions**

**-Central Resolution Form and Instructions**

**-External Adjudication Form and Instructions**

**-Adjudication Resolution Form**

**Longitudinal ICD Study  
Glossary for Central Review and External Adjudication Panels  
(Information in Gray relevant to Central Review Only)**

**Table 1. General Definitions**

|                            |                                                                                                                                                                                                                                                                                                                                                                                                                                                                                                                                                                                                                                                                                                                                                                                                                                                                                                                                               |
|----------------------------|-----------------------------------------------------------------------------------------------------------------------------------------------------------------------------------------------------------------------------------------------------------------------------------------------------------------------------------------------------------------------------------------------------------------------------------------------------------------------------------------------------------------------------------------------------------------------------------------------------------------------------------------------------------------------------------------------------------------------------------------------------------------------------------------------------------------------------------------------------------------------------------------------------------------------------------------------|
| Date of Interrogation      | The date recorded as the day the ICD interrogation was performed either by date stamp from the programmer or documentation from other reported sources (e.g., CPT code, dictation note). The date is already documented on the Treated Episode Cover Page.                                                                                                                                                                                                                                                                                                                                                                                                                                                                                                                                                                                                                                                                                    |
| What is a treated episode? | An episode is an arrhythmic event, as defined by the device, which required treatment by the ICD including either antitachycardia pacing (ATP) or ICD shock. (An inappropriate therapy is considered an episode as long as therapy was delivered by the ICD). Counters advanced due to DFT testing will not be considered an episode but the interrogation report will be reviewed to identify that the therapy was not a spontaneously occurring treated episode.                                                                                                                                                                                                                                                                                                                                                                                                                                                                            |
| Episode termination        | <p><i>“An episode’s termination was defined by the ICD re-detecting sinus rhythm and thus could include more than 1 shock (and/or ATP bursts).”</i></p> <p>In addition to sinus rhythm, termination could be a paced rhythm or any heart rate that falls below the VT/VF detection rate cut off and consequently the device does not treat.</p> <p>* Inappropriate implantable cardioverter-defibrillator shocks in MADIT II: frequency, mechanisms, predictors, and survival impact. Daubert JP, Zareba W, Cannom DS, McNitt S, Rosero SZ, Wang P, Schuger C, Steinberg JS, Higgins SL, Wilber DJ, Klein H, Andrews ML, Hall WJ, Moss AJ; MADIT II Investigators. <i>J. Am. Coll. Cardiol.</i> 2008;51;1357-1365</p>                                                                                                                                                                                                                         |
| Treated episode number     | <p>A subject’s treated episodes will be numbered chronologically during the initial review process at Marshfield. When the review packets reach the panel, the Treated Episode Cover Page and the corresponding source documentation will already be separated into these consecutively numbered sections. Do not refer to the episode numbers listed on programmer print out. If an additional treated episode is identified during the central review process, please add that episode and its review results to the available row on the Central Review Form following the prenumbered episodes. Following the review process, the treated episodes will be renumbered chronologically before final data entry.</p> <p>For treated episodes sent for external adjudication review, additional identification will be added to the source documents to help identify and link episodes, clinical notes and interrogation data together.</p> |

|                                     |                                                                                                                                                                                                                                                                                                                                                                                                                                                                                                                                                                                                                                                                                                               |
|-------------------------------------|---------------------------------------------------------------------------------------------------------------------------------------------------------------------------------------------------------------------------------------------------------------------------------------------------------------------------------------------------------------------------------------------------------------------------------------------------------------------------------------------------------------------------------------------------------------------------------------------------------------------------------------------------------------------------------------------------------------|
| Date of treated episode             | Interrogation reports document the dates and times of recorded episodes. When supporting information is available to the site abstractor and the central coordinator, the Treated Episode Cover Page will already contain the abstracted date and time for each episode.                                                                                                                                                                                                                                                                                                                                                                                                                                      |
| Time of treated episode             | This time maybe expressed as AM, PM or Military Time and this expression can vary in the same patient between episodes, and sometimes may not be known. If there are inconsistencies in dates and/or times across source documents, decisions will be determined by preponderance of data.                                                                                                                                                                                                                                                                                                                                                                                                                    |
| ICD Therapy                         | <p><i>“The ICD therapy was defined as either antitachycardia pacing (ATP) or ICD shock.”</i></p> <p>* Inappropriate implantable cardioverter-defibrillator shocks in MADIT II: frequency, mechanisms, predictors, and survival impact. Daubert JP, Zareba W, Cannom DS, McNitt S, Rosero SZ, Wang P, Schuger C, Steinberg JS, Higgins SL, Wilber DJ, Klein H, Andrews ML, Hall WJ, Moss AJ; MADIT II Investigators. <i>J. Am. Coll. Cardiol.</i> 2008;51:1357-1365</p>                                                                                                                                                                                                                                        |
| What is ATP?                        | <p>Any use of pacing stimulation technique including ramp, burst, burst +, etc. delivered as programmed for an episode of ventricular tachyarrhythmia or delivered as ATP before or during charge.</p> <p>In presence of a device interrogation report that could be expected to show this, or in presence of a local provider interpretation, assume no ATP during charge for a shock unless the ATP was specified.</p>                                                                                                                                                                                                                                                                                      |
| What is shock therapy?              | Any therapy recorded by the ICD as a shock delivered will qualify as a shock regardless of energy delivered. Aborted shocks are not considered a therapy.                                                                                                                                                                                                                                                                                                                                                                                                                                                                                                                                                     |
| Was ATP and/or shock appropriate?   | <p><i>ATP and/or shock were considered to be appropriate if therapy was delivered for “device-detected VT/VF episodes that were confirmed to be ventricular in origin.”</i></p> <p>* Appropriate and Inappropriate Ventricular Therapies, Quality of Life, and Mortality Among Primary and Secondary Prevention Implantable Cardioverter Defibrillator Patients Results From the Pacing Fast VT REduces Shock Therapies (PainFREE Rx II) Trial. Sweeney MO, Wathen MS, Volosin K, Abdalla I, DeGroot PJ, Otterness MF, Stark AJ. <i>Circulation</i> 2005; 111:2898-2905.</p>                                                                                                                                  |
| Was ATP and/or shock inappropriate? | <p><i>“Any ICD therapy not delivered for VT or VF was deemed inappropriate...”</i></p> <p>* Inappropriate implantable cardioverter-defibrillator shocks in MADIT II: frequency, mechanisms, predictors, and survival impact. Daubert JP, Zareba W, Cannom DS, McNitt S, Rosero SZ, Wang P, Schuger C, Steinberg JS, Higgins SL, Wilber DJ, Klein H, Andrews ML, Hall WJ, Moss AJ; MADIT II Investigators. <i>J. Am. Coll. Cardiol.</i> 2008;51;1357-1365</p> <p>There will also be episodes for which it may be impossible to determine appropriateness of therapy due to incomplete or missing data, unclassified rhythms, or unresolved reviewer disagreement. These will be classified as “Uncertain”.</p> |

|                                                                              |                                                                                                                                                                                                                                                                                                                                                                                                                                                                                                                                                                                                                                                                                                                                                                                                                                                                                                                                                                                                                                                                                                                                                                                                                                                                                                                                                                                                                                                                                                                                                                                                                                                         |
|------------------------------------------------------------------------------|---------------------------------------------------------------------------------------------------------------------------------------------------------------------------------------------------------------------------------------------------------------------------------------------------------------------------------------------------------------------------------------------------------------------------------------------------------------------------------------------------------------------------------------------------------------------------------------------------------------------------------------------------------------------------------------------------------------------------------------------------------------------------------------------------------------------------------------------------------------------------------------------------------------------------------------------------------------------------------------------------------------------------------------------------------------------------------------------------------------------------------------------------------------------------------------------------------------------------------------------------------------------------------------------------------------------------------------------------------------------------------------------------------------------------------------------------------------------------------------------------------------------------------------------------------------------------------------------------------------------------------------------------------|
| <p>Local provider's impression of appropriateness of the treated episode</p> | <p>This is the interpretation from the provider(s) involved in patient's care included in the clinical source documentation provided for review. The local provider impression (i.e., the 'call on the field') will be recorded as 'Appropriate' or 'Inappropriate'. A classification of 'Uncertain' for this field will be used if the local provider's impression is itself documented to be 'Uncertain', or if the local impression is missing from the source documentation or otherwise not informative.</p>                                                                                                                                                                                                                                                                                                                                                                                                                                                                                                                                                                                                                                                                                                                                                                                                                                                                                                                                                                                                                                                                                                                                       |
| <p>Was ATP and or shock therapy Successful?</p>                              | <p><i>"Successful ATP, applied during or before charging, was defined as termination of the fast rhythm and shock prevention."</i></p> <p>For our study, successful ATP is being interpreted to accommodate any number of ATP sequences, provided ATP terminates the fast rhythm and no shock was employed.</p> <p>* Optimizing implantable Cardioverter-defibrillator treatment of rapid ventricular tachycardia: Antitachycardia pacing therapy during charging. Schoels W, Steinhaus D, Johnson WB, O'Hara G, Schwab JO, Jenniskens I, DeGroot PJ, Tang F, Helmling E, on behalf of the EnTrust Clinical Study Investigators). <i>Heart Rhythm</i>, Vol 4, Issue 7, pages 863 to 990 (July 2007)</p> <p><i>Shock was successful if the arrhythmia terminated after a shock with the ICD re-detecting sinus rhythm and thus could include more than 1 shock (and/or ATP)."</i></p> <p>* Inappropriate implantable cardioverter-defibrillator shocks in MADIT II: frequency, mechanisms, predictors, and survival impact. Daubert JP, Zareba W, Cannom DS, McNitt S, Rosero SZ, Wang P, Schuger C, Steinberg JS, Higgins SL, Wilber DJ, Klein H, Andrews ML, Hall WJ, Moss AJ; MADIT II Investigators. <i>J. Am. Coll. Cardiol.</i> 2008;51;1357-1365</p> <p>In our study, return to baseline rhythm or a paced rhythm (not just sinus rhythm) would also be considered successful.</p> <p>In the presence of a local provider interpretation, assume an appropriate therapy was successful unless otherwise indicated, provided there is evidence that indicates the subject was no longer in ventricular arrhythmia at some later point in time.</p> |
| <p>Was ATP Unsuccessful?</p>                                                 | <p>An ATP attempt was classified as unsuccessful if the arrhythmia did not terminate or <i>'if the arrhythmia terminated, but immediate reinitiation of premature ventricular contractions (PVC's) resulted in shock delivery.'</i></p> <p>* Optimizing implantable Cardioverter-defibrillator treatment of rapid ventricular tachycardia: Antitachycardia pacing therapy during charging. Schoels W, Stenihaus D, Johnson WB, O'Hara G, Schwab JO, Jenniskens I, DeGroot PJ, Tang F, Helmling E, on behalf of the EnTrust Clinical Study Investigators). <i>Heart Rhythm</i>, Vol 4, Issue 7, pages 863 to 990 (July 2007)</p>                                                                                                                                                                                                                                                                                                                                                                                                                                                                                                                                                                                                                                                                                                                                                                                                                                                                                                                                                                                                                         |
| <p>Was shock Unsuccessful?</p>                                               | <p>When shock is delivered and the arrhythmia does not terminate with that <i>or subsequent shocks or ATP therapy</i>, the shock will be deemed unsuccessful.</p>                                                                                                                                                                                                                                                                                                                                                                                                                                                                                                                                                                                                                                                                                                                                                                                                                                                                                                                                                                                                                                                                                                                                                                                                                                                                                                                                                                                                                                                                                       |

|                                                        |                                                                                                                                                                                                                                                                                                                                                                                                                                                                                                                                                                                                                                                                                                                                                                                                                                                                                                                                                                                       |
|--------------------------------------------------------|---------------------------------------------------------------------------------------------------------------------------------------------------------------------------------------------------------------------------------------------------------------------------------------------------------------------------------------------------------------------------------------------------------------------------------------------------------------------------------------------------------------------------------------------------------------------------------------------------------------------------------------------------------------------------------------------------------------------------------------------------------------------------------------------------------------------------------------------------------------------------------------------------------------------------------------------------------------------------------------|
| <p>VT Termination with ATP (Type I)</p>                | <p><i>“In type-1 termination, the VT ceases immediately after the last ATP pulse so the first post-ATP beat is a sinus or paced beat.”</i></p> <p>* Incidence and Characteristics of Type-2 Breaks in Response to Antitachycardia Pacing Therapy in Implantable Cardioverter Defibrillator Patients. Sharma V, DeGroot PJ, Wathen MS. <i>Journal of Cardiovascular Electrophysiology</i> 2003;14:1156-1162.</p>                                                                                                                                                                                                                                                                                                                                                                                                                                                                                                                                                                       |
| <p>VT Termination with ATP (Type II)</p>               | <p><i>“...the same or different VT can persist for one or more beats after the final ATP pulse, and restoration of sinus or regular paced rhythm is delayed.”</i></p> <p>* Incidence and Characteristics of Type-2 Breaks in Response to Antitachycardia Pacing Therapy in Implantable Cardioverter Defibrillator Patients. Sharma V, DeGroot PJ, Wathen MS. <i>Journal of Cardiovascular Electrophysiology</i> 2003;14:1156-1162.</p>                                                                                                                                                                                                                                                                                                                                                                                                                                                                                                                                                |
| <p>VF Termination</p>                                  | <p>Apply the same definition for VF type I and II termination as used for VT</p>                                                                                                                                                                                                                                                                                                                                                                                                                                                                                                                                                                                                                                                                                                                                                                                                                                                                                                      |
| <p>Arrhythmia discrimination between VT vs. VF</p>     | <p><i>“Arrhythmia diagnosis was not based on rigid arrhythmia definitions. Reviewers will base diagnosis on characteristics such as abruptness of onset of the arrhythmia, the morphology of the electrogram of the arrhythmia compared to the morphology of the electrogram in normal rhythm, the rate, the regularity of the arrhythmia, and the mode of termination.”</i></p> <p>The arrhythmia was not exclusively defined by detection zones. Clinical information such as symptoms during the event, could also be considered by the reviewers in making a diagnosis.</p> <p>* Analysis of Implantable Cardioverter Defibrillator Therapy in the Antiarrhythmics Versus implantable Defibrillators (AVID) Trial. Klein RC, Raitt MH, Wilkoff BL, Beckman KJ, Coromilas J, Wyse DG, Friedman PL, Martins JB, Epstein AE, Hallstrom AP, Ledingham RB, Belco KM, Greenle HL, and the AVID Investigators. <i>Journal of Cardiovascular Electrophysiology</i> 2003; 14: 940-948.</p> |
| <p>Inappropriate ATP or shock due to SVT and/or AF</p> | <p><i>“Any ICD therapy not delivered for VT or VF was deemed inappropriate, and the rhythm triggering therapy categorized as: atrial fibrillation or atrial flutter (AF), supraventricular including sinus tachycardia (SVT), or inappropriate sensing using published criteria.”</i></p> <p>* Inappropriate implantable cardioverter-defibrillator shocks in MADIT II: frequency, mechanisms, predictors, and survival impact. Daubert JP, Zareba W, Cannom DS, McNitt S, Rosero SZ, Wang P, Schuger C, Steinberg JS, Higgins SL, Wilber DJ, Klein H, Andrews ML, Hall WJ, Moss AJ; MADIT II Investigators. <i>J. Am. Coll. Cardiol.</i> 2008;51;1357-1365</p> <p>If rhythm triggering inappropriate ICD therapy (ATP or shock) was SVT and/or AF (A Fib/Flutter), it should be so indicated.</p>                                                                                                                                                                                    |

|                                                                                                   |                                                                                                                                                                                                                                                                                                                                                                                                                                                                                                                                                                                                                                                                                                                                                                                                                                                                                                                                                                                                                                                                                                                                                                                                                                                                                                                                                                                                        |
|---------------------------------------------------------------------------------------------------|--------------------------------------------------------------------------------------------------------------------------------------------------------------------------------------------------------------------------------------------------------------------------------------------------------------------------------------------------------------------------------------------------------------------------------------------------------------------------------------------------------------------------------------------------------------------------------------------------------------------------------------------------------------------------------------------------------------------------------------------------------------------------------------------------------------------------------------------------------------------------------------------------------------------------------------------------------------------------------------------------------------------------------------------------------------------------------------------------------------------------------------------------------------------------------------------------------------------------------------------------------------------------------------------------------------------------------------------------------------------------------------------------------|
| <p>Inappropriate ATP or shock due to Sensing Problems</p>                                         | <p><i>“Inappropriate therapy occurs in the absence of tachycardia because nonphysiological or nonarrhythmic, physiological signals are oversensed and detected as arrhythmias. Nonphysiological signals usually are extracardiac. Physiological signals may be Intracardiac (P, R, or T waves) or extracardiac (myopotentials).”</i></p> <p>* Advanced ICD Troubleshooting: Part I Charles D. Swerdlow; Paul A. Friedman <i>PACE</i> 2005;28:1322–1346.</p>                                                                                                                                                                                                                                                                                                                                                                                                                                                                                                                                                                                                                                                                                                                                                                                                                                                                                                                                            |
| <p>Inappropriate ATP or shock due to Other</p>                                                    | <p>Therapy delivered for device malfunctions not classifiable as ‘inappropriate sensing’ will also be considered inappropriate and can be categorized under Other.</p>                                                                                                                                                                                                                                                                                                                                                                                                                                                                                                                                                                                                                                                                                                                                                                                                                                                                                                                                                                                                                                                                                                                                                                                                                                 |
| <p>Appropriateness of therapy in presence of Unclassified Rhythm.</p>                             | <p>Rhythms triggering ICD therapy are considered to be unclassified if data or documentation with which to make the classification are missing, incomplete, or otherwise uninformative.</p> <p>For this study, unclassified rhythms will result in a designation of Uncertain appropriateness (see table 2.)</p> <p>* Inappropriate implantable cardioverter-defibrillator shocks in MADIT II: frequency, mechanisms, predictors, and survival impact. Daubert JP, Zareba W, Cannom DS, McNitt S, Rosero SZ, Wang P, Schuger C, Steinberg JS, Higgins SL, Wilber DJ, Klein H, Andrews ML, Hall WJ, Moss AJ; MADIT II Investigators. <i>J. Am. Coll. Cardiol.</i> 2008;51;1357-1365</p>                                                                                                                                                                                                                                                                                                                                                                                                                                                                                                                                                                                                                                                                                                                 |
| <p>Did inappropriate ATP cause untoward rhythm requiring therapy?</p>                             | <p>If ATP or shock was delivered for a NON ventricular rhythm (inappropriate therapy) and the ATP or shock caused VT or VF requiring further therapy it will be considered to have caused an untoward rhythm.</p> <p>If there is a local provider interpretation present, assume no untoward rhythm following an inappropriate therapy unless one is specified. If no local provider interpretation is present, then choose unknown.</p>                                                                                                                                                                                                                                                                                                                                                                                                                                                                                                                                                                                                                                                                                                                                                                                                                                                                                                                                                               |
| <p>Sufficient documentation to classify appropriateness of ICD therapy for any given episode.</p> | <p>Source documentation will be reviewed initially upon receipt by the therapy data collection center for determination of completeness by the study coordinator. If data are felt to be missing or incomplete, additional information will be requested from the investigation site. Before the records are passed on to the central review panel, the data will be considered to be as “complete” as can be, meaning no additional information is available.</p> <p>For each treated episode, the reviewer is asked to ‘Indicate the highest level for which sufficient documentation was available to evaluate appropriateness’. The responses will include 3 levels of sufficiency, with assignment in hierarchical fashion, indicated here from highest to lowest: <i>electrogram</i>, which represents the presence of the relevant intracardiac electrogram(s) in the abstracted source documentation; <i>other clinical features in description or report</i>, which, in the absence of electrograms, would be selected to represent availability in the source documentation of specific descriptions of the standard features of ventricular tachyarrhythmias (or specific descriptions of their absence); <i>local interpretation</i>, which in absence of either of the higher levels of sufficiency, would be selected to reflect availability of the local provider’s interpretation</p> |

|  |                                                                                                                                                                                                                                                                                                                                                                                                                                                                                                                                                                                                                                                                                                                                                                                                                                                                    |
|--|--------------------------------------------------------------------------------------------------------------------------------------------------------------------------------------------------------------------------------------------------------------------------------------------------------------------------------------------------------------------------------------------------------------------------------------------------------------------------------------------------------------------------------------------------------------------------------------------------------------------------------------------------------------------------------------------------------------------------------------------------------------------------------------------------------------------------------------------------------------------|
|  | <p>of the episode. A response of <i>No</i> would be selected if none of the 3 types of evidence were available.</p> <p>It is possible for there to be relevant information in the source documentation that could support a determination that a therapy was ‘probably appropriate’ or ‘probably inappropriate’, but that does not meet the definitions of any of the 3 specified levels of sufficiency, resulting in the selection of <i>No</i>.</p> <p>Likewise, it is also possible that the source documentation can be found to be sufficient, and yet the central/external review can record the therapy appropriateness as ‘Uncertain’, e.g., when intracardiac electrograms, key clinical features, or local clinical interpretation is fully captured, but for some reason, that evidence is not conclusive as to the exact nature of the arrhythmia.</p> |
|--|--------------------------------------------------------------------------------------------------------------------------------------------------------------------------------------------------------------------------------------------------------------------------------------------------------------------------------------------------------------------------------------------------------------------------------------------------------------------------------------------------------------------------------------------------------------------------------------------------------------------------------------------------------------------------------------------------------------------------------------------------------------------------------------------------------------------------------------------------------------------|

**Table 2. Levels of Appropriateness of Therapy**

|                                           |                                                                                                                                                                                                                                                                                                                                                                                                                                                                                                                                                                                                                                                                                                                                                                                                                                                                                                                                                                                                                                                                                                                                                            |
|-------------------------------------------|------------------------------------------------------------------------------------------------------------------------------------------------------------------------------------------------------------------------------------------------------------------------------------------------------------------------------------------------------------------------------------------------------------------------------------------------------------------------------------------------------------------------------------------------------------------------------------------------------------------------------------------------------------------------------------------------------------------------------------------------------------------------------------------------------------------------------------------------------------------------------------------------------------------------------------------------------------------------------------------------------------------------------------------------------------------------------------------------------------------------------------------------------------|
| <b>Categories</b>                         | <p>5 levels of appropriateness will be used to classify treated episodes for the purpose of initial central review and external adjudication. These can be compressed as needed into 3 categories during analysis and study reporting.</p> <p>As a general rule, the clinical interpretation regarding the appropriateness of ICD therapy will be that determined by the clinicians involved in the patient’s care except in circumstances in which there is dependable evidence that the original clinical determination was incorrect.</p> <p>When it is clear that the local provider did not have access to the primary data source (i.e., the interrogation was performed elsewhere), ‘Uncertain’ should be the response for the review question about the local provider interpretation. In this case, ‘Uncertain’ should also be the response for the review question about appropriateness of therapy unless the reviewer has other relevant source material to support their decision. The occurrence of an episode can be identified from the programmer printouts alone but the appropriateness of therapy can not be assumed in this case.</p> |
| <b>Definitely Appropriate ICD therapy</b> | <p>The Central Review and External Adjudication Panels will consider ICD therapy to be <b><u>Definitely Appropriate</u></b> if intracardiac electrogram criteria are available and confirm ventricular arrhythmias. This requires direct review and confirmation of the rhythm either by the healthcare providers involved in the case or by members of the study’s Central Review or External Adjudication Panels. A case in which ICD therapy is present and the Intracardiac electrograms are no longer available for review will be considered to be definitely appropriate only if there is written documentation in the clinical notes by the healthcare provider involved in the case of having personally reviewed the electrograms and specific description of the standard criteria for defining ventricular tachyarrhythmias, such as sudden onset, morphology change, presence of AV dissociation, etc., are present.</p>                                                                                                                                                                                                                      |



|                                                                  |                                                                                                                                                                                                                                                                                                                                                                                                                                                                                                                                                                                                                                                                                                                                                                                                                                                                                                                                                                                                                                                                                                                                                                                                                                                                                                                                                                                                                                                                                                                                                                                      |
|------------------------------------------------------------------|--------------------------------------------------------------------------------------------------------------------------------------------------------------------------------------------------------------------------------------------------------------------------------------------------------------------------------------------------------------------------------------------------------------------------------------------------------------------------------------------------------------------------------------------------------------------------------------------------------------------------------------------------------------------------------------------------------------------------------------------------------------------------------------------------------------------------------------------------------------------------------------------------------------------------------------------------------------------------------------------------------------------------------------------------------------------------------------------------------------------------------------------------------------------------------------------------------------------------------------------------------------------------------------------------------------------------------------------------------------------------------------------------------------------------------------------------------------------------------------------------------------------------------------------------------------------------------------|
| <p><b>Probably Appropriate</b> ICD therapy</p>                   | <p>The Central Review and External Adjudication Panels will consider ICD therapy to be <b>Probably Appropriate</b> if: 1) in the clinical judgment of the healthcare provider/s caring for the patient, the episode was documented to be VT or VF (i.e., ‘Appropriate’), but some of the diagnostic elements (i.e. intracardiac electrograms or detailed description of the standard criteria for defining VT or VF), are missing from the source documentation, preventing full confirmation by the review panel; AND, 2) in the judgment of the reviewers it is felt that the evidence available in the source documentation does not contradict the local interpretation.</p> <p>ICD therapy may also be classified as <b>Probably Appropriate</b> when: 1) the local clinical interpretation was classified as ‘Uncertain’ ([see definition of Local provider’s impression...’ in Table 1, above] i.e., documented as uncertain, missing, or otherwise uninformative); AND, 2) in the judgment of the reviewers, the source documentation is suggestive of clinical criteria for VT/VF, but does not meet the strict threshold for ‘definitely appropriate’, as described above.</p>                                                                                                                                                                                                                                                                                                                                                                                             |
| <p><b>Uncertain</b> regarding appropriateness of ICD therapy</p> | <p>As is the case in clinical practice, the designation of <b>Uncertain</b> regarding the appropriateness of ICD therapy is to be <b>avoided</b> when classification is otherwise possible.</p> <p>Consistent with the criteria used to assign appropriateness of ICD therapy, the Central Review and External Adjudication Panels will consider appropriateness of ICD therapy to be <b>Uncertain</b> in cases in which the local clinical interpretation was classified as ‘Uncertain’ ([see definition of ‘Local provider’s impression...’ in Table 1 above] i.e., documented as uncertain, missing, or otherwise uninformative) and there is not evidence to the contrary in the source documentation to make a determination in either direction.</p> <p>Appropriateness of therapy for an episode will also be recorded as <b>Uncertain</b> by reviewers when adequate source documentation is present to confirm that the rhythm should be considered Unclassified.</p> <p>Appropriateness of therapy for an episode will also be considered <b>Uncertain</b> by reviewers if the panel members can not reconcile differences in their classification assignment.</p> <p>Records where appropriateness is classified as Uncertain by one or both reviewers, or classified with differing levels of appropriateness will undergo a resolution review conference, with consultation between reviewers to pursue consensus where possible. If consensus can not be reached on a specific level of appropriateness, the episode will then retain an uncertain classification.</p> |

|                                                    |                                                                                                                                                                                                                                                                                                                                                                                                                                                                                                                                                                                                                                                                                                                                                                                                                                                                                                                                                                                                                                                                                                                                                                                                                                                                                                                                                                                                                                                                     |
|----------------------------------------------------|---------------------------------------------------------------------------------------------------------------------------------------------------------------------------------------------------------------------------------------------------------------------------------------------------------------------------------------------------------------------------------------------------------------------------------------------------------------------------------------------------------------------------------------------------------------------------------------------------------------------------------------------------------------------------------------------------------------------------------------------------------------------------------------------------------------------------------------------------------------------------------------------------------------------------------------------------------------------------------------------------------------------------------------------------------------------------------------------------------------------------------------------------------------------------------------------------------------------------------------------------------------------------------------------------------------------------------------------------------------------------------------------------------------------------------------------------------------------|
| <p><b>Probably Inappropriate ICD therapy</b></p>   | <p>Reviewers will consider the ICD therapy to be <b><u>Probably Inappropriate</u></b> if: 1) in the clinical judgment of the healthcare providers involved in the case, the episode was documented to be due to a rhythm/reason other than VT or VF (i.e., ‘Inappropriate’), but necessary diagnostic elements (e.g., review of the Intracardiac electrograms; or detailed description in the clinical note describing the absent elements of VT and/or VF; or an adequate description of device malfunction) are not available from the source documentation, preventing full confirmation by the review panel. [Standard elements of VT/VF that would be absent include sudden onset, morphology change, presence of AV dissociation, etc.]; AND, 2) in the judgment of the reviewers it is felt that the evidence available in the source documentation does not contradict the local interpretation.</p> <p>ICD therapy may also be classified as <b><u>Probably Inappropriate</u></b> when: 1) the local clinical interpretation was classified as ‘Uncertain’ ([see definition of ‘Local provider’s impression...’ in Table 1, above] i.e., documented as uncertain, missing, or otherwise uninformative); AND, 2) in the judgment of the reviewers, the source documentation is sufficient to satisfy clinical criteria for rhythms/reasons other than VT/VF, but does not meet the strict threshold for ‘definitely inappropriate’, as described below.</p> |
| <p><b>Definitely Inappropriate ICD therapy</b></p> | <p>Reviewers will consider ICD therapy to be <b><u>Definitely Inappropriate</u></b> if intracardiac electrogram criteria are available and consistent with therapy for something other than ventricular arrhythmias. This requires direct review and confirmation of Intracardiac electrograms either by the healthcare providers involved in the case, or members of either the Central Review Panel or External Adjudication Committee. A case in which ICD therapy is present and the Intracardiac electrograms are no longer available for review will be considered to be definitely inappropriate only if there is written documentation in the clinical notes by the healthcare provider involved in the case of having personally reviewed the electrogram; and including either a specific description of the absent criteria which rule out ventricular tachyarrhythmia or adequate description of device malfunction as a cause of the inappropriate therapy.</p>                                                                                                                                                                                                                                                                                                                                                                                                                                                                                        |

**Table 3. Episode Collection Criteria:**

|                                     |                                                                                                                                                                                                                                                                                                                                                                                                                                                                                                                                                                                                                                                                                                                                                                                                                                                                                                                                                                                                                                                                                                                                                                                                                |
|-------------------------------------|----------------------------------------------------------------------------------------------------------------------------------------------------------------------------------------------------------------------------------------------------------------------------------------------------------------------------------------------------------------------------------------------------------------------------------------------------------------------------------------------------------------------------------------------------------------------------------------------------------------------------------------------------------------------------------------------------------------------------------------------------------------------------------------------------------------------------------------------------------------------------------------------------------------------------------------------------------------------------------------------------------------------------------------------------------------------------------------------------------------------------------------------------------------------------------------------------------------|
| <p>Number of collected episodes</p> | <p>A total of 10 treated episodes will be collected.</p> <p>Abstractors have been asked to include what are reported as aborted therapies, so that it may be determined by central review whether therapy was delivered or not.</p> <p>No more than three treated episodes will be collected from any given 24 hour period. This limits the collection of multiple episodes during a VT storm utilizing an accepted definition of “storm” (greater than 3 episodes of VT/VF detected in a 24 hour period).</p> <p>* Electrical storm in patients with transvenous implantable cardioverter-defibrillators: Incidence, management and prognostic implications. Credner SC, Klinghenben T, Mauss O, Sticherling C, Hohnloser SH. <i>J Am Coll Cardiol.</i> 1998;32(7):1909-15.</p> <p>Data collection will end at the identification of 10 treated episodes. However if all true treated episodes are determined to be appropriate or if all true treated episodes are determined to be inappropriate, additional episode retrieval may be requested from the site to support the planned ‘time to first event’ analyses for primary (appropriate therapy) and secondary (inappropriate therapy) end points.</p> |
| <p>Grouping Episodes</p>            | <p>In circumstances where multiple episodes are present and the dictation note groups them together (i.e., they are not broken down into single isolated episodes) with no clear description of specific therapy or results of therapy, the correct choice will be ‘Uncertain’ for questions about Initial Type of Therapy, whether the episode included any shocks, the local provider interpretation, and the appropriateness of therapy.</p> <p>For the purpose of data collection and abstraction, if there are potentially multiple episodes on the same day or interrogation, but no specific times for each episode is listed, or if it is not clear that at least 3 of the episodes were treated in a 24 hour period (maximum number per 24 hours to be collected by study) then only one episode will be recorded for any given day.</p>                                                                                                                                                                                                                                                                                                                                                              |

ICD LONGITUDINAL STUDY – THERAPY COLLECTION  
 ICD THERAPY CENTRAL REVIEW FORM – Version 04/11/11

Central Review Panel to complete one form for each participant; attach additional pages as necessary

**GREEN FOLDERS ONLY: Based on the information provided, did participant experience any treated episodes during the follow-up period?** Yes \_\_\_ No (Return folder w/form to Deb – ML3)

STUDY ID No. \_\_\_\_\_  
 REVIEWER ID No. \_\_\_\_\_

ALL OTHER FOLDERS COMPLETE ONE ROW FOR EACH TREATED EPISODE COVER PAGE INCLUDED

| Box 1.<br>Date of Interrogation | Box 2.<br>Treated Episode # | Box 3.<br>Date of Treated Episode | Box 4.<br>Time of Treated Episode      | Box 5.<br>What was initial type of therapy for this episode?   | Box 6.<br>If initial type was SVT/AF or Shock, did this episode include any additional shocks? | Box 7.<br>If initial type was Shock, did the episode include any additional shocks? | Box 8.<br>Local provider indicated therapy for this episode was: | Box 9.<br>Was initial therapy for this episode appropriate? | Box 10.<br>If appropriate therapy for this episode successful? | Box 13.<br>Indicate the highest level for which documentation was available to evaluate appropriateness               | Box 14.<br>Notes:                                  |
|---------------------------------|-----------------------------|-----------------------------------|----------------------------------------|----------------------------------------------------------------|------------------------------------------------------------------------------------------------|-------------------------------------------------------------------------------------|------------------------------------------------------------------|-------------------------------------------------------------|----------------------------------------------------------------|-----------------------------------------------------------------------------------------------------------------------|----------------------------------------------------|
| ___/___/___<br>mm/dd/yy         | ___#                        | ___/___/___<br>mm/dd/yy           | ___:___<br>AM<br>PM<br>MT<br>Uncertain | ___<br>Shock<br>Uncertain<br>Not a Treated Episode<br>Stop Row | Yes, one<br>Yes, multiple<br>Yes, unsure if one or multiple<br>No<br>Uncertain                 | Yes<br>No<br>Uncertain                                                              | Appropriate<br>Uncertain<br>Inappropriate                        | Definitely Appropriate<br>Probably Appropriate<br>Uncertain | Yes<br>No<br>Uncertain                                         | Yes, by E-gram<br>Yes, by other clinical features in description or report<br>Yes, by local interpretation only<br>No | _____<br>_____<br>_____<br>_____<br>_____<br>_____ |
| ___/___/___<br>mm/dd/yy         | ___#                        | ___/___/___<br>mm/dd/yy           | ___:___<br>AM<br>PM<br>MT<br>Uncertain | ___<br>Shock<br>Uncertain<br>Not a Treated Episode<br>Stop Row | Yes, one<br>Yes, multiple<br>Yes, unsure if one or multiple<br>No<br>Uncertain                 | Yes<br>No<br>Uncertain                                                              | Appropriate<br>Uncertain<br>Inappropriate                        | Definitely Appropriate<br>Probably Appropriate<br>Uncertain | Yes<br>No<br>Uncertain                                         | Yes, by E-gram<br>Yes, by other clinical features in description or report<br>Yes, by local interpretation only<br>No | _____<br>_____<br>_____<br>_____<br>_____<br>_____ |

## Instructions for Completing ICD Therapy Central Review Form

The data you receive for review will have been reviewed for completeness using the quality assurance checklist process. If data are determined to be missing, additional information or clarification will be requested from the site prior to submission for central review. Once data and forms are submitted to reviewers, all available data and all resources will have been exhausted.

The form has been color-coded to assist you in completing required boxes determined by a specific answer. Please complete each box accordingly. Please write legibly. Forms will be returned to reviewer if not complete.

**Fill in the Study ID No.** This number has been prefilled. Compare this number to the number located on the chart tab and on the forms included in the chart to ensure correct form is being completed.

**Fill in Reviewer ID No.** Your reviewer ID number has been prefilled.

Dr. Romel Garcia-Montilla 113-A

Dr. John Hayes 113-B

Dr. Param Sharma 113-C

Mary Suits-113-D

Dr. Humberto Vidaillet 113-E

Dr. Paul Varosy 113-F (Marshfield cases only)

**GREEN FOLDERS ONLY: Based on the information provided, did participant experience any treated episodes during the follow-up period?** A portion of the subjects you will review are a sampling of those with no treated episodes. If you determine there were treated episodes, check *Yes* and complete remainder of the form. If you determine there were no treated episodes, check *No* and stop review.

**Box 1-Date of Interrogation:** Date of interrogation been prefilled.

**Box 2-Treated episode number:** Treated episode number has been prefilled.

**Box 3-Date of treated episode:** Date of treated episode has been prefilled.

**Box 4-Time of treated episode:** Time of treated episode has been prefilled.

**Box 5-What was initial type of therapy for this episode?:** Determine the initial type of therapy for this episode and circle the appropriate answer. If you determine that this is not a treated episode circle "Not a treated episode" and stop row. Remember to consider that some devices have ATP during or before charge and this should be considered when evaluating initial therapy.

**Box 6-If initial type of therapy was ATP or Uncertain did the episode include any shocks?:**

If you determined in Box 5 that initial type of therapy for this treated episode was ATP or Uncertain, complete this box. Circle "Yes-one" if only one shock was delivered. Circle "Yes-multiple" if there was more than one shock delivered. Circle "Yes-unsure if one or multiple" if you know shock was delivered but cannot determine how many were

delivered. Circle "No" if no shocks were delivered. Circle "Uncertain" if you cannot determine if there were any shocks delivered. Skip Box 7 and proceed to Box 8.

**Box 7-If initial type of therapy was Shock did the episode include any additional Shocks?:** If you determined in Box 5 that initial type of therapy for this treated episode was "Shock", complete this box. Circle "Yes" if it is known that one or more additional shocks were given. Circle "No" if you determine that no additional shocks were delivered. Circle "Uncertain" if you cannot determine if additional shocks were delivered. Proceed to Box 8.

**Box 8-Local provider indicated therapy for this episode was:** Review the clinical notes and documentation provided to determine the local provider's interpretation of appropriateness of therapy for this episode and circle answer. Proceed to Box 9.

**Box 9-Was initial therapy for this episode appropriate?:** Use the *Glossary for Central Review and External Adjudication Panel* to assist you in determining appropriateness of therapy and circle answer. Proceed to Box 10 if "Definitely Appropriate" or "Probably Appropriate". Skip Box 10 and proceed to Box 11 if "Probably Inappropriate" or "Definitely Inappropriate". If you cannot make a determination of appropriateness, circle "Uncertain", skip Boxes 10, 11, and 12, and proceed to Box 13.

**Box 10-If appropriate, was therapy for this episode successful?:** If you determined in Box 9 that initial therapy was "Definitely Appropriate" or "Probably Appropriate", complete this box. Use the *Glossary for Central Review and External Adjudication Panel* to assist you in determining if therapy was successful and circle appropriate answer. If you cannot make a determination of success, circle "Uncertain". Skip Boxes 11 and 12, and proceed to Box 13.

**Box 11-If inappropriate, initial therapy for this episode was due to:** If you determined in Box 9 that initial therapy for this episode was "Probably Inappropriate" or "Definitely Inappropriate", complete this box. Use the *Glossary for Central Review and External Adjudication Panel* to assist you in determining the reason for the inappropriate therapy and circle "SVT/AF" or "Sensing Problem." If neither of these describes the cause, circle "Other" and also specify in the Notes the reason for the inappropriate therapy. If you are unable to determine the cause, circle "Uncertain." Proceed to Box 12.

**Box 12-If inappropriate, did initial therapy for this episode cause an untoward rhythm requiring further therapy?:** Circle answer using guidance from the *Glossary for Central Review and External Adjudication Panel* document. Proceed to Box 13.

**Box 13- Indicate the highest level for which sufficient documentation was available to evaluate appropriateness:** Answer this question based on the extent of documentation you had available to complete Box 9 (Was initial therapy for this episode appropriate?). Circle the appropriate answer, using a hierarchical assignment. If the electrogram was available, please indicate this. If not, but there was specific description of the standard features of ventricular tachyarrhythmias, then please choose this level. If neither of the above were provided, but there was a local provider interpretation available, please indicate this. Chose 'No' if none of the above were available. Please note, under the existing definitions, it is possible for there to be some relevant source

information provided that could support a determination of 'probably appropriate' or 'probably inappropriate' in Box 9, but that does not meet the specific definitions of any of the 3 levels of this sufficiency variable resulting in a 'No'.

**Box 14-Notes:** Use this area to explain any qualifying information needed, as well as to specify the description of "Other" if used in Box 11 to define reason for inappropriate therapy.

Complete one form for each participant, starting a new row for each Treated Episode Cover Page included in chart. Use additional forms if necessary.

Return chart and form to Deb Multerer-ML3

## ICD Longitudinal Study – Central Review Resolution Form

**Directions:** For each item below, examine the responses from both reviewers and note any discrepant responses. For each discrepant response, discuss it with the co-reviewer and determine a mutually agreeable response. Then in the last column, Combined Reviewer Response, select the resolved (final) response that best answers each item. Mark any unresolved items as “Not resolved” and enter further comments at the end of the form if necessary. Also, be sure to follow the appropriate skip patterns based on your resolved answer. Some cases will be automatically chosen for external review. If, however, you and the co-reviewer believe this case should be nominated for guaranteed external review, please indicate so in the space designated on page 2. Return this completed form to Deb Multerer, ML3.

| STUDY ID #                                                                                   |                          |                          |                                                                                                                                                                                                                                                                                                                                                                                                           |
|----------------------------------------------------------------------------------------------|--------------------------|--------------------------|-----------------------------------------------------------------------------------------------------------------------------------------------------------------------------------------------------------------------------------------------------------------------------------------------------------------------------------------------------------------------------------------------------------|
| Date of Interrogation:                                                                       | REVIEWER #1<br>RESPONSES | REVIEWER #2<br>RESPONSES | COMBINED REVIEWER<br>RESPONSE:                                                                                                                                                                                                                                                                                                                                                                            |
| Treated episode number:                                                                      | ID:                      | ID:                      |                                                                                                                                                                                                                                                                                                                                                                                                           |
| Date of treated episode:                                                                     | NAME:                    | NAME:                    |                                                                                                                                                                                                                                                                                                                                                                                                           |
| Time of treated episode:                                                                     |                          |                          |                                                                                                                                                                                                                                                                                                                                                                                                           |
| <b>Box #</b>                                                                                 |                          |                          |                                                                                                                                                                                                                                                                                                                                                                                                           |
| 5. What was the initial type of therapy for this episode?                                    |                          |                          | <input type="radio"/> ATP ( <i>go to box 6</i> )<br><input type="radio"/> Shock ( <i>→ skip to box 7</i> )<br><input type="radio"/> Uncertain ( <i>go to box 6</i> )<br><input type="radio"/> Not treated ( <i>Stop</i> )<br><input type="radio"/> Not resolved <i>Box 8</i>                                                                                                                              |
| 6. If initial type was <b><u>ATP or Uncertain</u></b> , did this episode include any shocks? |                          |                          | <input type="radio"/> Yes, one<br><input type="radio"/> Yes, multiple<br><input type="radio"/> Yes, but number unclear<br><input type="radio"/> No<br><input type="radio"/> Uncertain<br><input type="radio"/> Not resolved<br><i>Go to box 8</i>                                                                                                                                                         |
| 7. If initial type was <b><u>Shock</u></b> , did this episode include any additional shocks? |                          |                          | <input type="radio"/> Yes<br><input type="radio"/> No<br><input type="radio"/> Uncertain<br><input type="radio"/> Not resolved<br><i>Go to box 8</i>                                                                                                                                                                                                                                                      |
| 8. Local provider indicated therapy for this episode was:                                    |                          |                          | <input type="radio"/> Appropriate<br><input type="radio"/> Uncertain<br><input type="radio"/> Inappropriate<br><input type="radio"/> Not resolved<br><i>Go to Box 9</i>                                                                                                                                                                                                                                   |
| 9. Was initial therapy for this episode appropriate?                                         |                          |                          | <input type="radio"/> Definitely appropriate ( <i>go to box 10</i> )<br><input type="radio"/> Probably appropriate ( <i>go to box 10</i> )<br><input type="radio"/> Uncertain ( <i>→ skip to box 13</i> )<br><input type="radio"/> Probably inappropriate ( <i>→ skip to box 11</i> )<br><input type="radio"/> Definitely inappropriate ( <i>→ skip to box 11</i> )<br><input type="radio"/> Not resolved |



|                                                                                                                              |             |  |                                                                                                                                                                                                                                                            |
|------------------------------------------------------------------------------------------------------------------------------|-------------|--|------------------------------------------------------------------------------------------------------------------------------------------------------------------------------------------------------------------------------------------------------------|
| 10. If Appropriate, was the therapy for this episode successful?                                                             |             |  | <input type="radio"/> Yes<br><input type="radio"/> No<br><input type="radio"/> Uncertain<br><input type="radio"/> Not resolved<br><i>Go to box 13</i>                                                                                                      |
| 11. If Inappropriate, initial therapy for this episode was due to:                                                           |             |  | <input type="radio"/> SVT / AF<br><input type="radio"/> Sensing problem<br><input type="radio"/> Other: _____<br><hr/> <input type="radio"/> Uncertain<br><input type="radio"/> Not resolved<br><i>Go to box 12</i>                                        |
| 12. If Inappropriate, did initial therapy for this episode cause untoward rhythm requiring further therapy?                  |             |  | <input type="radio"/> Yes<br><input type="radio"/> No<br><input type="radio"/> Uncertain<br><input type="radio"/> Not resolved<br><i>Go to box 13</i>                                                                                                      |
| 13. Indicate the highest level for which sufficient documentation available to evaluate the appropriateness of this episode? |             |  | <input type="radio"/> Yes, by E-gram<br><input type="radio"/> Yes, by other clinical report features<br><input type="radio"/> Yes, by local interpretation only<br><input type="radio"/> No sufficient documentation<br><input type="radio"/> Not resolved |
| Should this case be "manually" nominated for external review?                                                                |             |  | <input type="radio"/> Yes <input type="radio"/> No<br><i>Some cases will automatically be chosen for external review based on responses. Indicating "Yes" guarantees this record will go for external review.</i>                                          |
| Other comments or concerns related to this episode?                                                                          | <hr/> <hr/> |  |                                                                                                                                                                                                                                                            |

## **Instructions for Completing ICD Therapy Central Review Resolution Form**

The Corresponding Reviewer is to discuss discrepancy(s) for each treated episode with the second assigned reviewer and provide resolution for each discrepancy listed. Responses from both reviewers have been provided. Complete each box with final answer in the Combined Reviewer response column. If unable to resolve discrepancy, mark Not resolved and enter comments below if necessary. Forms will be returned to reviewer #1 if not complete.

**Study ID No., Date of Interrogation, Treated episode number, Date of treated episode and Time of treated episode information has been prefilled.**

**Box 5-What was initial type of therapy for this episode?:** Determine the initial type of therapy for this episode and mark the appropriate answer. If you determine that this is not a treated episode mark "Not treated" and stop. Remember to consider that some devices have ATP during or before charge and this should be considered when evaluating initial therapy. If you are unable to resolve, mark "Not resolved" and proceed to Box 8.

**Box 6-If initial type of therapy was ATP or Uncertain did the episode include any shocks?:** If you determined in Box 5 that initial type of therapy for this treated episode was ATP or Uncertain, complete this box. Mark "Yes-one" if only one shock was delivered. Mark "Yes-multiple" if there was more than one shock delivered. Mark "Yes-unsure if one or multiple" if you know shock was delivered but cannot determine how many were delivered. Mark "No" if no shocks were delivered. Mark "Uncertain" if you cannot determine if there were any shocks delivered. If you are unable to resolve, mark "Not resolved." Skip Box 7 and proceed to Box 8.

**Box 7-If Initial type of therapy was Shock did the episode include any additional Shocks?:** If you determined in Box 5 that initial type of therapy for this treated episode was "Shock", complete this box. Mark "Yes" if it is known that one or more additional shocks were given. Mark "No" if you determine that no additional shocks were delivered. Mark "Uncertain" if you cannot determine if additional shocks were delivered. If you are unable to resolve, mark "Not resolved." Proceed to Box 8.

**Box 8-Local provider indicated therapy for this episode was:** Review the clinical notes and documentation provided to determine the local provider's interpretation of appropriateness of therapy for this episode and mark answer. If you are unable to resolve, mark "Not resolved." Proceed to Box 9.

**Box 9-Was initial therapy for this episode appropriate?:** Use the *Glossary for Central Review and External Adjudication Panel* to assist you in determining appropriateness of therapy and mark answer. Proceed to Box 10 if "Definitely Appropriate" or "Probably Appropriate". Skip Box 10 and proceed to Box 11 if "Probably Inappropriate" or "Definitely Inappropriate". If you cannot make a determination of appropriateness, mark "Uncertain." If you are unable to resolve, mark "Not resolved." Skip Boxes 10, 11, and 12, and proceed to Box 13.

**Box 10-If appropriate, was therapy for this episode successful?:** If you determined in Box 9 that initial therapy was "Definitely Appropriate" or "Probably Appropriate", complete this box. Use the *Glossary for Central Review and External Adjudication Panel* to assist you in

determining if therapy was successful and mark appropriate answer. If you cannot make a determination of success, mark "Uncertain". If you are unable to resolve, mark "Not resolved." Skip Boxes 11 and 12, and proceed to Box 13.

**Box 11-If inappropriate, initial therapy for this episode was due to:** If you determined in Box 9 that initial therapy for this episode was "Probably Inappropriate" or "Definitely Inappropriate", complete this box. Use the *Glossary for Central Review and External Adjudication Panel* to assist you in determining the reason for the inappropriate therapy and mark "SVT/AF" or "Sensing Problem." If neither of these describes the cause, mark "Other" and specify the reason for the inappropriate therapy. If you are unable to determine the cause, mark "Uncertain." If you are unable to resolve, mark "Not resolved." Proceed to Box 12.

**Box 12-If inappropriate, did initial therapy for this episode cause an untoward rhythm requiring further therapy?:** Mark answer using guidance from the *Glossary for Central Review and External Adjudication Panel* document. If you are unable to resolve, select "Not resolved." Proceed to Box 13

**Box 13- Indicate the highest level for which sufficient documentation was available to evaluate appropriateness:** Answer this question based on the extent of documentation you had available to complete Box 9 (Was initial therapy for this episode appropriate?). Mark the appropriate answer, using a hierarchical assignment. If the electrogram was available, please indicate this. If not, but there was specific description of the standard features of ventricular tachyarrhythmias, then please choose this level. If neither of the above was provided, but there was a local provider interpretation available, please indicate this. Chose 'No' if none of the above were available. Please note, under the existing definitions, it is possible for there to be some relevant source information provided that could support a determination of 'probably appropriate' or 'probably inappropriate' in Box 9, but that does not meet the specific definitions of any of the 3 levels of this sufficiency variable resulting in a 'No'. If you are unable to resolve, mark "Not resolved."

**Should this case be "manually" nominated for external review?:** Based on your resolution responses and the selection criteria for external adjudication this case may be selected for external review. However, if one or both reviewers feel it warrants special attention for some reason you can nominate this case to be automatically selected for external adjudication regardless of the selection criteria. Select Yes or No accordingly.

**Form Resolution Comments:** Enter any comments you feel are pertinent to the resolution of the chart.

Return chart and form to Deb Multerer-ML3

## **Instructions for Completing ICD Therapy Central Review Resolution Form**

The Corresponding Reviewer is to discuss discrepancy(s) for each treated episode with the second assigned reviewer and provide resolution for each discrepancy listed. Responses from both reviewers have been provided. Complete each box with final answer in the Combined Reviewer response column. If unable to resolve discrepancy, mark Not resolved and enter comments below if necessary. Forms will be returned to reviewer #1 if not complete.

**Study ID No., Date of Interrogation, Treated episode number, Date of treated episode and Time of treated episode information has been prefilled.**

**Box 5-What was initial type of therapy for this episode?:** Determine the initial type of therapy for this episode and mark the appropriate answer. If you determine that this is not a treated episode mark "Not treated" and stop. Remember to consider that some devices have ATP during or before charge and this should be considered when evaluating initial therapy. If you are unable to resolve, mark "Not resolved" and proceed to Box 8.

**Box 6-If initial type of therapy was ATP or Uncertain did the episode include any shocks?:** If you determined in Box 5 that initial type of therapy for this treated episode was ATP or Uncertain, complete this box. Mark "Yes-one" if only one shock was delivered. Mark "Yes-multiple" if there was more than one shock delivered. Mark "Yes-unsure if one or multiple" if you know shock was delivered but cannot determine how many were delivered. Mark "No" if no shocks were delivered. Mark "Uncertain" if you cannot determine if there were any shocks delivered. If you are unable to resolve, mark "Not resolved." Skip Box 7 and proceed to Box 8.

**Box 7-If Initial type of therapy was Shock did the episode include any additional Shocks?:** If you determined in Box 5 that initial type of therapy for this treated episode was "Shock", complete this box. Mark "Yes" if it is known that one or more additional shocks were given. Mark "No" if you determine that no additional shocks were delivered. Mark "Uncertain" if you cannot determine if additional shocks were delivered. If you are unable to resolve, mark "Not resolved." Proceed to Box 8.

**Box 8-Local provider indicated therapy for this episode was:** Review the clinical notes and documentation provided to determine the local provider's interpretation of appropriateness of therapy for this episode and mark answer. If you are unable to resolve, mark "Not resolved." Proceed to Box 9.

**Box 9-Was initial therapy for this episode appropriate?:** Use the *Glossary for Central Review and External Adjudication Panel* to assist you in determining appropriateness of therapy and mark answer. Proceed to Box 10 if "Definitely Appropriate" or "Probably Appropriate". Skip Box 10 and proceed to Box 11 if "Probably Inappropriate" or "Definitely Inappropriate". If you cannot make a determination of appropriateness, mark "Uncertain." If you are unable to resolve, mark "Not resolved." Skip Boxes 10, 11, and 12, and proceed to Box 13.

**Box 10-If appropriate, was therapy for this episode successful?:** If you determined in Box 9 that initial therapy was "Definitely Appropriate" or "Probably Appropriate", complete this box. Use the *Glossary for Central Review and External Adjudication Panel* to assist you in

determining if therapy was successful and mark appropriate answer. If you cannot make a determination of success, mark "Uncertain". If you are unable to resolve, mark "Not resolved." Skip Boxes 11 and 12, and proceed to Box 13.

**Box 11-If inappropriate, initial therapy for this episode was due to:** If you determined in Box 9 that initial therapy for this episode was "Probably Inappropriate" or "Definitely Inappropriate", complete this box. Use the *Glossary for Central Review and External Adjudication Panel* to assist you in determining the reason for the inappropriate therapy and mark "SVT/AF" or "Sensing Problem." If neither of these describes the cause, mark "Other" and specify the reason for the inappropriate therapy. If you are unable to determine the cause, mark "Uncertain." If you are unable to resolve, mark "Not resolved." Proceed to Box 12.

**Box 12-If inappropriate, did initial therapy for this episode cause an untoward rhythm requiring further therapy?:** Mark answer using guidance from the *Glossary for Central Review and External Adjudication Panel* document. If you are unable to resolve, select "Not resolved." Proceed to Box 13

**Box 13- Indicate the highest level for which sufficient documentation was available to evaluate appropriateness:** Answer this question based on the extent of documentation you had available to complete Box 9 (Was initial therapy for this episode appropriate?). Mark the appropriate answer, using a hierarchical assignment. If the electrogram was available, please indicate this. If not, but there was specific description of the standard features of ventricular tachyarrhythmias, then please choose this level. If neither of the above was provided, but there was a local provider interpretation available, please indicate this. Chose 'No' if none of the above were available. Please note, under the existing definitions, it is possible for there to be some relevant source information provided that could support a determination of 'probably appropriate' or 'probably inappropriate' in Box 9, but that does not meet the specific definitions of any of the 3 levels of this sufficiency variable resulting in a 'No'. If you are unable to resolve, mark "Not resolved."

**Should this case be "manually" nominated for external review?:** Based on your resolution responses and the selection criteria for external adjudication this case may be selected for external review. However, if one or both reviewers feel it warrants special attention for some reason you can nominate this case to be automatically selected for external adjudication regardless of the selection criteria. Select Yes or No accordingly.

**Form Resolution Comments:** Enter any comments you feel are pertinent to the resolution of the chart.

Return chart and form to Deb Multerer-ML3

**ICD LONGITUDINAL STUDY – THERAPY COLLECTION PILOT**  
 ICD THERAPY EXTERNAL ADJUDICATION FORM – Version 04/11/2011

**External Adjudication Panel Member to complete one form for each treated arrhythmic episode selected for adjudication.** All dates have been redacted and episodes are identified only by treated episode number. When completing each form, verify the Study ID No. and Treated Episode No. match the information on the ICD Treated Episode Cover Page and its corresponding documentation. Some documentation may be shared between treated episodes if occurring within the same interrogation. A separate form should be completed for each treated episode. Please see Instructions for Completing ICD Therapy External Adjudication Form document to assist you in completing this form. Please see Glossary for Central Review and External Adjudication Panel document for definitions of terms.

STUDY ID No. \_\_\_\_\_ REVIEWER ID No. \_\_\_\_\_

TREATED EPISODE No. \_\_\_\_\_

| Box 1.<br>Time of Treated Episode | Box 2.<br>What was initial type of therapy for this episode? | Box 3.<br>If multiple initial types were used, did the episode include any additional shocks? | Box 4.<br>If initial type was Shock, did the episode include any additional Shocks? | Box 5.<br>Local provider indicated therapy for this episode was: | Box 6.<br>Was initial therapy for this episode appropriate? | Box 7.<br>If appropriate, was therapy for this episode successful? | Box 8.<br>Was there a Sensing Problem? | Box 9.<br>Was there a SVT/AF? | Box 10.<br>Indicate the highest level for which sufficient documentation was available to evaluate appropriateness | Box 11.<br>Notes: |
|-----------------------------------|--------------------------------------------------------------|-----------------------------------------------------------------------------------------------|-------------------------------------------------------------------------------------|------------------------------------------------------------------|-------------------------------------------------------------|--------------------------------------------------------------------|----------------------------------------|-------------------------------|--------------------------------------------------------------------------------------------------------------------|-------------------|
| _____ : _____                     | AF                                                           | Yes, one                                                                                      | Yes                                                                                 | Appropriate                                                      | Definitely Appropriate                                      | Yes                                                                | SVT/AF                                 | Yes                           | Yes, by E-gram                                                                                                     |                   |
| AM                                | Shock                                                        | Yes, multiple                                                                                 | No                                                                                  | Uncertain                                                        | Probably Appropriate                                        | No                                                                 | Sensing Problem                        | No                            | Yes, by other clinical features in description or report                                                           |                   |
| Uncertain                         | Shock                                                        | Yes, unsure if one or multiple                                                                | Uncertain                                                                           | Inappropriate                                                    | Uncertain                                                   | Uncertain                                                          | Other: (Specify in Notes)              | Uncertain                     | Yes, by local interpretation only                                                                                  |                   |
|                                   | Not a treated episode (Stop Row)                             | No                                                                                            |                                                                                     |                                                                  | Definitely Inappropriate                                    |                                                                    |                                        |                               | No                                                                                                                 |                   |
|                                   |                                                              | Uncertain                                                                                     |                                                                                     |                                                                  | Definitely Inappropriate                                    |                                                                    |                                        |                               |                                                                                                                    |                   |

Return completed form to:  
 Deb Multerer  
 ICD Study Manager  
 Marshfield Clinic Research Foundation  
 1000 North Oak Avenue – ML3  
 Marshfield, WI 54449

## **Instructions for Completing ICD Therapy External Adjudication Form**

The data you receive for review will have been reviewed for completeness using the quality assurance checklist process. If data are determined to be missing, additional information or clarification will be requested from the site prior to submission for central/external review. Once data and forms are submitted to reviewers, all available data and resources will have been exhausted.

The form has been color-coded to assist you in completing required boxes determined by a specific answer. Complete each box accordingly. Please write legibly. Forms will be returned to reviewer if not complete or legible.

**Study ID No., Treated Episode No. and your Reviewer ID No.** will be prefilled. Please verify this information matches the documentation you are reviewing. All dates have been redacted and episodes are identified only by treated episode number.

**Box 1-Time of treated episode:** Enter time of treated episode from line item 6 on Treated Episode Cover Page. Circle "AM", "PM" or "MT" if available. If time is not able to be determined at all, circle "Uncertain".

**Box 2-What was initial type of therapy for this episode?:** Determine the initial type of therapy for this episode and circle the appropriate answer. If you determine that this is not a treated episode circle "Not a treated episode" and stop row. Remember to consider that some devices incorporate ATP during or before charge and this should be considered when evaluating initial therapy.

**Box 3-If initial type of therapy was ATP or Uncertain did the episode include any shocks?:** If you determined in Box 2 that initial type of therapy for this treated episode was "ATP" or "Uncertain", complete this box. Circle "Yes-one" if only one shock was delivered. Circle "Yes-multiple" if there was more than one shock delivered. Circle "Yes-unsure if one or multiple" if you know shock was delivered but cannot determine how many were delivered. Circle "No" if no shocks were delivered. Circle "Uncertain" if you cannot determine if there were any shocks delivered. Skip Box 4 and proceed to Box 5.

**Box 4-If Initial type was Shock did the episode include any additional Shocks?:** If you determined in Box 2 that initial type of therapy for this treated episode was "Shock", complete this box. Circle "Yes" if it is known that one or more additional shocks were given. Circle "No" if you determine that no additional shocks were delivered. Circle "Uncertain" if you cannot determine if additional shocks were delivered. Proceed to Box 5.

**Box 5-Local provider indicated therapy for this episode was:** Review the clinical notes and documentation provided to determine the local provider's interpretation of appropriateness of therapy for this episode and circle answer. Circle 'Uncertain' if the local provider's impression is itself recorded as 'Uncertain', or if the local impression is missing from the source documentation or otherwise not informative. Proceed to Box 6.

**Box 6-Was initial therapy for this episode appropriate?:** Use the *Glossary for Central Review and External Adjudication Panel* to assist you in determining appropriateness of therapy and circle answer. Then proceed to Box 7 if "Definitely Appropriate" or "Probably Appropriate". Or, skip Box 7 and proceed to Box 8 if "Probably Inappropriate" or "Definitely

Inappropriate”. If you can not make a determination of appropriateness, circle “Uncertain”, skip Boxes 7, 8, and 9, and proceed to Box 10.

**Box 7-If appropriate, was therapy for this episode successful?:** If you determined in Box 6 that initial therapy was “Definitely Appropriate” or “Probably Appropriate”, complete this box. Use the *Glossary for Central Review and External Adjudication Panel* to assist you in determining if therapy was successful and circle appropriate answer. If you can not make a determination of success, circle “Uncertain”. Skip Boxes 8 and 9, and proceed to Box 10.

**Box 8-If inappropriate, initial therapy for this episode was due to:** If you determined in Box 6 that initial therapy for this episode was “Probably Inappropriate” or “Definitely Inappropriate”, complete this box. Use the *Glossary for Central Review and External Adjudication Panel* to assist you in determining the reason for the inappropriate therapy and circle “SVT/AF” or “Sensing Problem.” If neither of these describes the cause, circle "Other" and specify in the Notes the reason for the inappropriate therapy. If you are unable to determine the cause, circle “Uncertain.” Proceed to Box 9.

**Box 9-If inappropriate, did initial therapy for this episode cause an untoward rhythm requiring further therapy?:** Circle answer using guidance from the *Glossary for Central Review and External Adjudication Panel* document. Proceed to Box 10.

**Box 10- Indicate the highest level for which sufficient documentation was available to evaluate appropriateness:** Answer this question based on the extent of documentation you had available to complete Box 6 (Was initial therapy for this episode appropriate?). Circle the appropriate answer, using a hierarchical assignment. If the electrogram was available, please indicate this. If not, but there was specific description of the standard features of ventricular tachyarrhythmias, then please choose this level. If neither of the above were provided, but there was a local provider interpretation available, please indicate this. Choose ‘No’ if none of the above were available. Please note, under the existing definitions, it is possible for there to be some relevant source information provided that could support a determination of ‘probably appropriate’ or ‘probably inappropriate’ in Box 6, but that does not meet the specific definitions of any of the 3 levels of this sufficiency variable resulting in a ‘No’.

**Box 11-Notes:** Use this area to explain any qualifying information needed, as well as to specify the description of "Other" if used in Box 8 to define reason for inappropriate therapy.

Return form to:  
Deb Multerer  
ICD Study Manager  
Marshfield Clinic Research Foundation  
1000 N Oak Ave – ML3  
Marshfield, WI 54449



## ICD Longitudinal Study – External Review Resolution Form

**Directions:** For each item below, examine the responses from both reviewers and note any discrepant responses. For any discrepant items, discuss it with the co-reviewer and determine a mutually agreeable response. The third reviewer has the source documentation to provide additional input should it be needed. Marshfield staff will record the combined reviewer response at the time of the resolution conference call.

|                                                                                                     |                          |                          |                                                                                                                                                                                                                                                                                                                                                                     |
|-----------------------------------------------------------------------------------------------------|--------------------------|--------------------------|---------------------------------------------------------------------------------------------------------------------------------------------------------------------------------------------------------------------------------------------------------------------------------------------------------------------------------------------------------------------|
| STUDY ID # : 10200007                                                                               |                          |                          |                                                                                                                                                                                                                                                                                                                                                                     |
| Treated episode number:                                                                             | REVIEWER #1<br>RESPONSES | REVIEWER #2<br>RESPONSES | COMBINED REVIEWER<br>RESPONSE:                                                                                                                                                                                                                                                                                                                                      |
| Time of treated episode:                                                                            | ID:<br>NAME:             | ID:<br>NAME:             |                                                                                                                                                                                                                                                                                                                                                                     |
| <b>Box #</b>                                                                                        |                          |                          |                                                                                                                                                                                                                                                                                                                                                                     |
| <b>2.</b> What was the initial type of therapy for this episode?                                    |                          |                          | <input type="radio"/> ATP ( <i>go to box 3</i> )<br><input type="radio"/> Shock ( <i>→ skip to box 4</i> )<br><input type="radio"/> Uncertain ( <i>go to box 3</i> )<br><input type="radio"/> Not treated ( <i>Stop</i> )                                                                                                                                           |
| <b>3.</b> If initial type was <b><u>ATP or Uncertain</u></b> , did this episode include any shocks? |                          |                          | <input type="radio"/> Yes, one<br><input type="radio"/> Yes, multiple<br><input type="radio"/> Yes, but number unclear<br><input type="radio"/> No<br><input type="radio"/> Uncertain<br><i>Go to box 5</i>                                                                                                                                                         |
| <b>4.</b> If initial type was <b><u>Shock</u></b> , did this episode include any additional shocks? |                          |                          | <input type="radio"/> Yes<br><input type="radio"/> No<br><input type="radio"/> Uncertain<br><i>Go to box 5</i>                                                                                                                                                                                                                                                      |
| <b>5.</b> Local provider indicated therapy for this episode was:                                    |                          |                          | <input type="radio"/> Appropriate<br><input type="radio"/> Uncertain<br><input type="radio"/> Inappropriate<br><i>Go to box 6</i>                                                                                                                                                                                                                                   |
| <b>6.</b> Was initial therapy for this episode appropriate?                                         |                          |                          | <input type="radio"/> Definitely appropriate<br><i>(Go to box 7)</i><br><input type="radio"/> Probably appropriate<br><i>(Go to box 7)</i><br><input type="radio"/> Uncertain ( <i>→ skip to box 10</i> )<br><input type="radio"/> Probably inappropriate<br><i>(→ skip to box 8)</i><br><input type="radio"/> Definitely inappropriate<br><i>(→ skip to box 8)</i> |
| <b>7.</b> If Appropriate, was the therapy for this episode successful?                              |                          |                          | <input type="radio"/> Yes<br><input type="radio"/> No<br><input type="radio"/> Uncertain<br><i>Go to box 10</i>                                                                                                                                                                                                                                                     |
| <b>8.</b> If Inappropriate, initial therapy for this episode was due to:                            |                          |                          | <input type="radio"/> SVT / AF<br><input type="radio"/> Sensing problem<br><input type="radio"/> Other: _____<br><br><input type="radio"/> Uncertain<br><i>Go to box 9</i>                                                                                                                                                                                          |

|                                                                                                                                     |                                           |                                           |                                                                                                                                                                                                                      |
|-------------------------------------------------------------------------------------------------------------------------------------|-------------------------------------------|-------------------------------------------|----------------------------------------------------------------------------------------------------------------------------------------------------------------------------------------------------------------------|
| <b>9.</b> If Inappropriate, did initial therapy for this episode cause untoward rhythm requiring further therapy?                   |                                           |                                           | <input type="radio"/> Yes<br><input type="radio"/> No<br><input type="radio"/> Uncertain<br><i>Go to box 10</i>                                                                                                      |
| <b>10.</b> Indicate the highest level for which sufficient documentation available to evaluate the appropriateness of this episode? |                                           |                                           | <input type="radio"/> Yes, by E-gram<br><input type="radio"/> Yes, by other clinical report features<br><input type="radio"/> Yes, by local interpretation only<br><input type="radio"/> No sufficient documentation |
| <b>11.</b> Notes:                                                                                                                   | <hr/> <hr/> <hr/> <hr/> <hr/> <hr/> <hr/> | <hr/> <hr/> <hr/> <hr/> <hr/> <hr/> <hr/> | <hr/> <hr/> <hr/> <hr/> <hr/> <hr/> <hr/>                                                                                                                                                                            |

**Masoudi FA et al.**

**Appendix G: Abstraction/Adjudication Processes**

**- Description**

**- Data Flow Diagram**

## **Appendix: LCISD Abstraction/Adjudication Processes**

### **Abstraction Procedures**

Medical records abstractors from each site receive training in study data collection procedures from the central coordination team, including the therapy collection coordinator, the study's ICD nurse, and electrophysiologists from the review and adjudication panels. General support and guidance from local site electrophysiology and ICD clinic staff is fostered to assure abstractor understanding of local clinical processes and access to local clinical data archives. The stated goal of therapy abstraction is to account for and record any ICD interrogations during the participants' follow-up periods, identify the presence of any treated arrhythmic episodes, and collect copies of pertinent source documentation, including interrogation reports with intracardiac electrograms and clinical notes with local provider interpretation.

Medical records for each study subject are targeted for abstraction after they accrue 3 years of follow-up, or sooner if their follow-up was truncated by a known death. Before abstraction, a distributed data management program prefills portions of the abstraction forms for each subject with selected data elements from the NCDR and VDW data files, including date of implant, device type, and dates of CPT 4 procedure codes for device interrogations, hospitalizations, and emergency room visits. Record review, however, is not limited to searching on those pre-printed dates. Aspects of medical records targeted to comprehensively capture interrogations and therapies include: ICD clinic appointment schedules, flow sheets, and arrhythmia clinical management systems; paper, electronic, and remotely archived ICD interrogation records; electronic medical records, including operative reports, history and physical reports, emergency room notes, hospital progress

notes, relevant cardiology consult notes, and discharge/expiration summaries. Following ER visits or hospitalizations, abstractors are instructed to evaluate the next clinic visit to the participant's regular device follow-up provider, and examine whether any information was recorded that suggests the device had been interrogated or that they had a treated arrhythmic episode since the previous device check. Direct review of hospital/ER records may also be needed to complete this evaluation. Abstractors are asked to provide a censoring date if they discover through medical record review that the subject could not be followed for the full 3 year period due to death, transfer of ICD care outside the health system, or if the device was explanted or permanently turned off.

Copies of relevant source documentation requested for all study subjects include the surgical implant note plus the device report and clinical note from the interrogation which covers the end of the subject's follow-up period. In addition, a copy of the device report with intracardiac electrograms, and any relevant clinical notes are requested for each treated arrhythmic episode. No more than three treated episodes are to be collected from any given 24 hour period, which will limit the influence of episodes that may represent a VT 'storm'. Because the marginal utility for the primary aims of the study diminishes with larger numbers of treated arrhythmic episodes per subject, the abstractors were also instructed to truncate collection after the 10<sup>th</sup> treated arrhythmic episode for each subject. Records indicating the presence of diverted shocks are also to be collected if there is any suggestion that the episode may have included delivery of an anti-tachycardia pacing therapy during charge.

Upon receipt of submitted forms and source documentation at the therapy data coordinating center, the record for each subject undergoes a quality edit review. Missing

or unclear information in the abstraction results in a Request for Additional Documentation, which is then investigated at the site and returned. Abstractors are expected to explain any gaps between interrogations of greater than 6 months, as well as to identify any identified gaps in follow-up coverage based on observed dates of interrogation periods.

### **Review/Adjudication Procedures**

Every subject will undergo central clinical review. Records for subjects with any suspected treated episodes that have available clinical documentation will be reviewed independently by two randomly selected members of the Central Clinical Review panel. The panel consists of 4 Marshfield Clinic physicians (3 board-certified electrophysiologists and 1 hospitalist) with expertise in interpreting ICD device reports and clinical records. Records for subjects with suspected treated episodes that have only the local provider interpretation and no clinical documentation will be reviewed by the ICD Study nurse, with 5% randomly selected and any questionable records directly referred for blinded review by the Central Review Panel. Records for subjects with no suspected treated episodes following abstraction and intake quality check will be reviewed by the study manager and the study ICD Nurse, with 5% randomly selected for blinded Quality Review by the Central Review Panel. While the central review records will contain no direct identifiers, a sample of records for subjects cared for at Marshfield Clinic will undergo additional external review for quality assurance.

The purpose of the Central review is to generate key study variables for each treated arrhythmic episode from the clinical perspective. The review follows a Glossary and Review Procedures document based on literature sources and finalized through extensive

discussion of the expert panel members. Reviewers will confirm or refute the occurrence of a treated episode, verify the episode's date and time, determine the initial type of therapy, determine whether there were multiple therapies present, document the local provider interpretation of the episode, record the appropriateness of therapy, and evaluate the success of appropriate therapy or the presence of untoward arrhythmic effects of inappropriate therapies. Reviewers will also record the extent of source documentation available for each episode. An attempt to resolve discrepancies between independent reviews will occur via dialog or arbitration within the central panel membership.

A separate panel of 3 expert electrophysiologists will provide external adjudication of treated arrhythmic episodes. Selection of treated episodes for external review will include treated episodes with discrepancies that could not be resolved by the Central panelists, a large sample of treated episodes with resolved discrepancies, and a small sample of episodes without discrepancies for quality assurance. Central review members also can nominate any treated episode for external review. The external process will include independent reviews of 2 randomly selected panelists, with the third reviewer held in reserve for 3-way conference or final arbitration as needed on any disagreements. For treated episode records selected for external adjudication, the external panel's submitted findings will be final. Following completion of the review process, subjects whose abstraction was truncated after 10 treated episodes before the end of their 3-year follow-up period, and who did not have at least one appropriate and one inappropriate therapy recorded, will be cycled back to the site abstractors to complete the full 3 years of collection.

Appendix: General processes of data abstraction, review, and quality assurance in the LSICD.

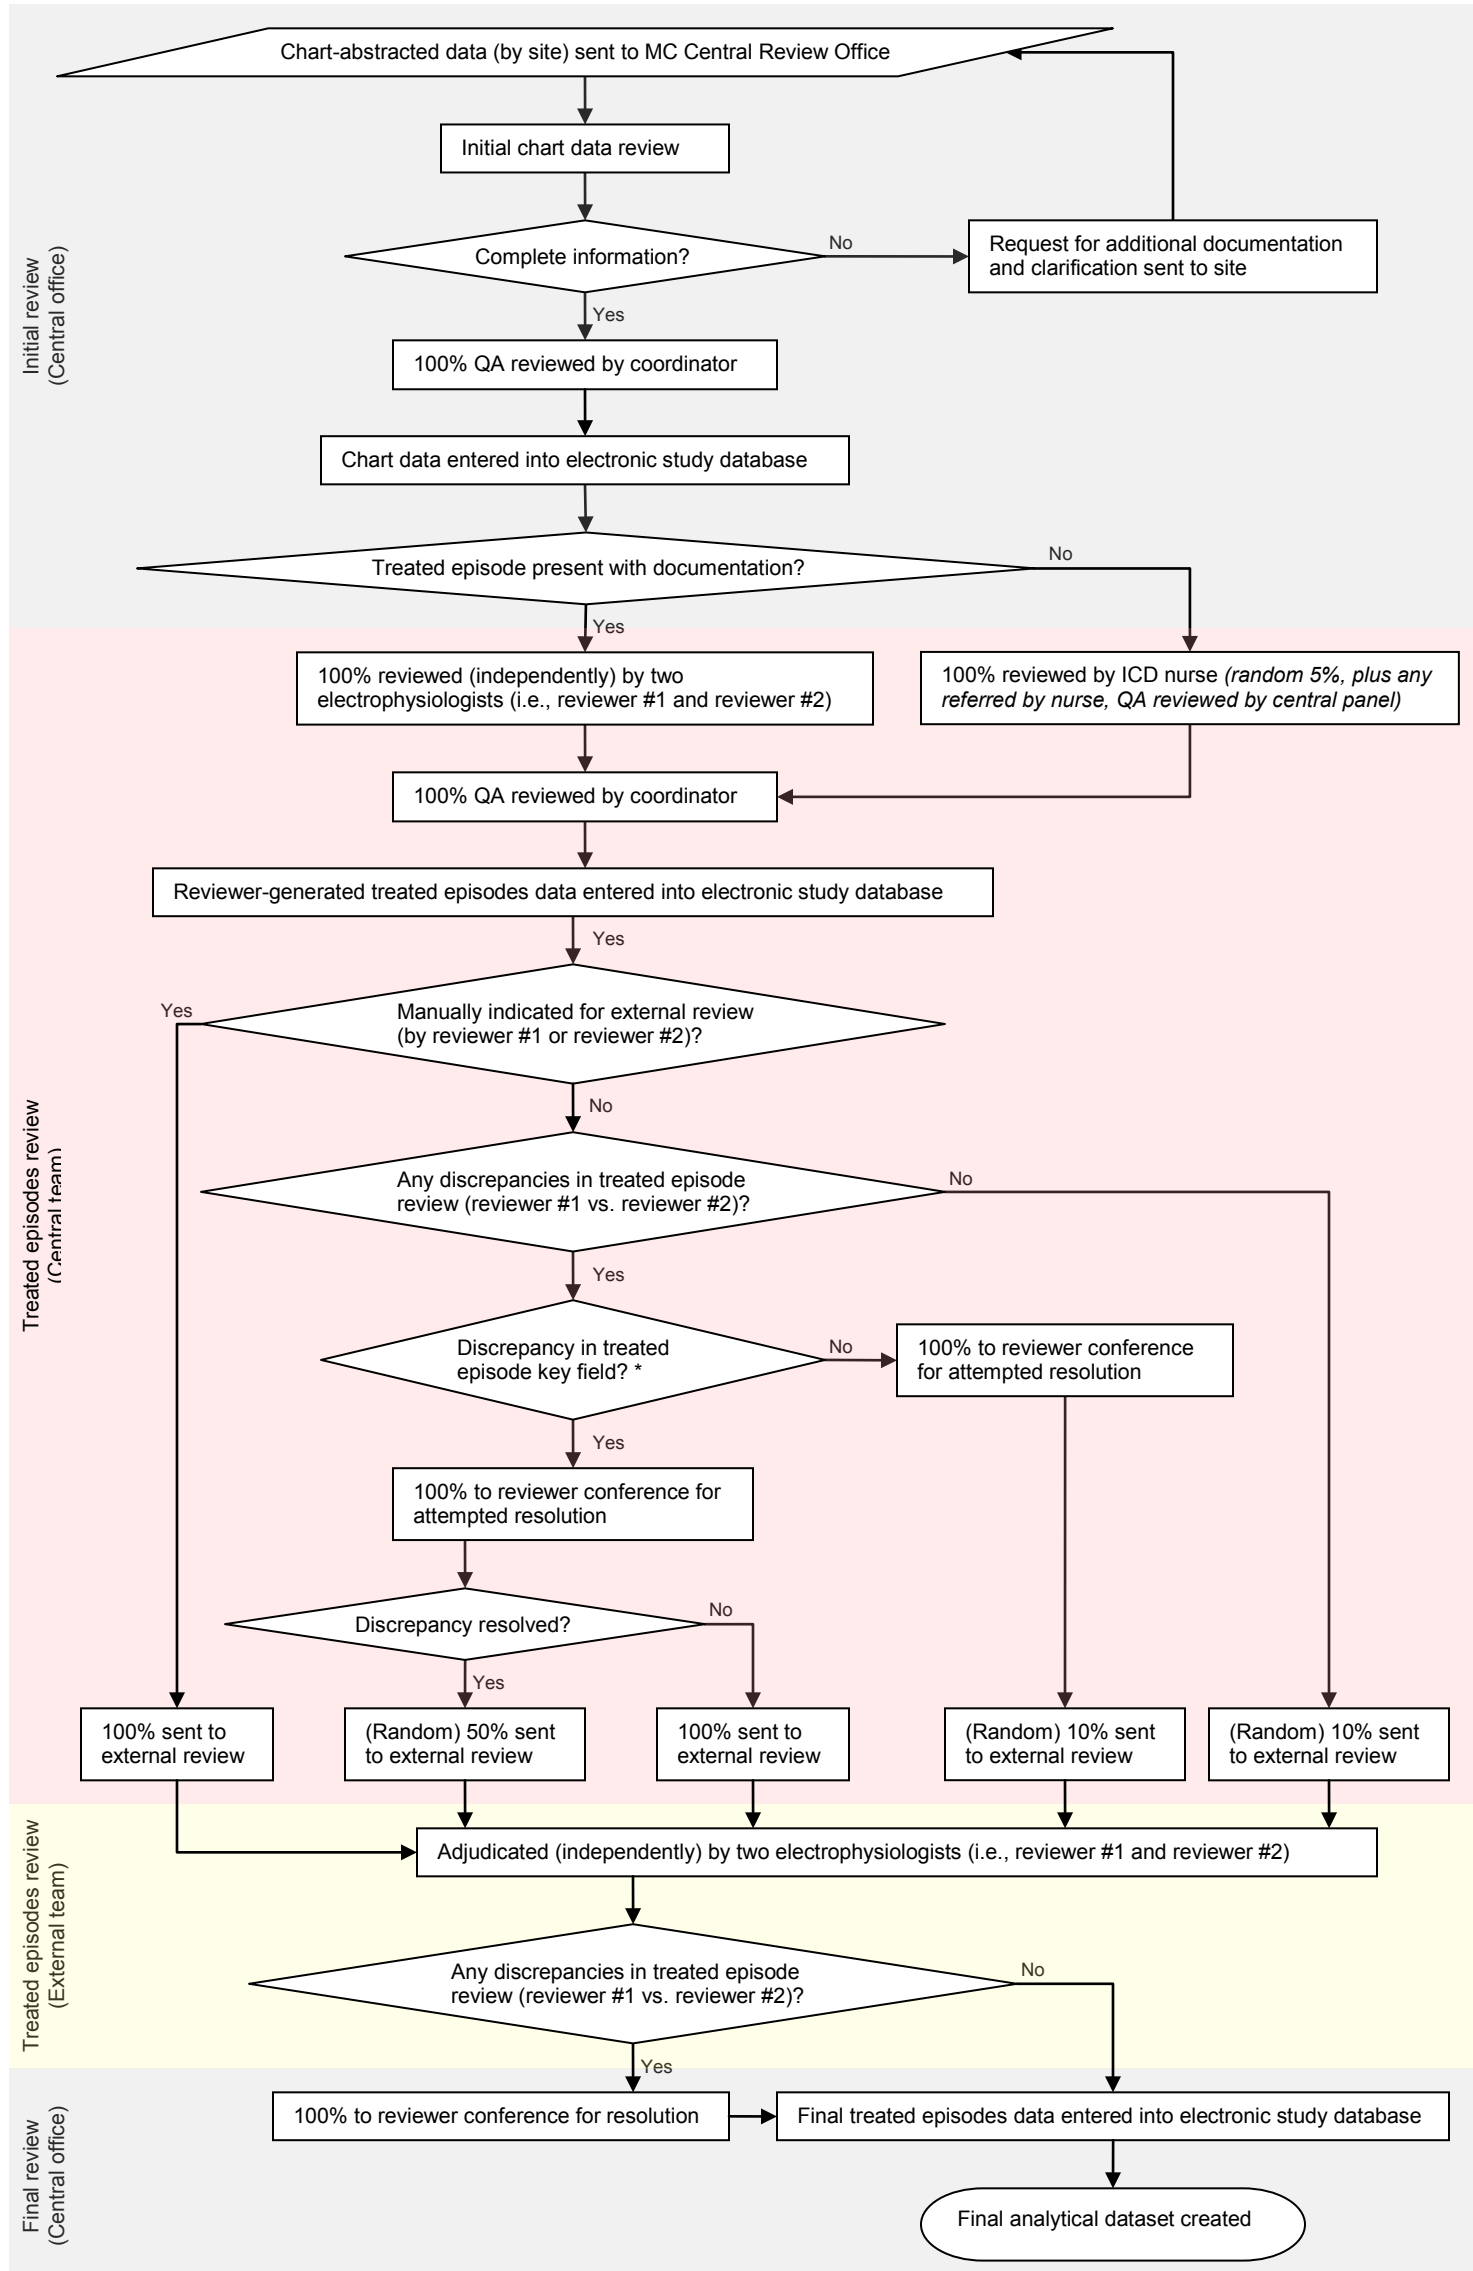

ICD = Implantable Cardiac Defibrillator; MC = Marshfield Clinic; QA = quality assurance

\* Key fields include (local) indication for, appropriateness of, outcome of, and/or sufficiency of treated episode. In addition, a discrepancy was also considered if the local provider indicated therapy for the treated episode was appropriate or inappropriate, while the central reviewer indicated therapy for the treated episode was uncertain.



Masoudi FA et al.

APPENDIX H: LSICD Therapy Collection Pilot, Selected Results

**Selected Results among subjects, N=43**

|                                                        | <b>Number</b> | <b>Percent</b> |
|--------------------------------------------------------|---------------|----------------|
| <b>Prior Implant</b>                                   |               |                |
| Yes                                                    | 1             | 2.3            |
| No                                                     | 42            | 97.7           |
| <b>Follow up censored before anticipated end date*</b> |               |                |
| Yes                                                    | 6             | 14.0           |
| No                                                     | 37            | 86.0           |
| <b>Surgical note documentation available</b>           |               |                |
| Yes                                                    | 40            | 93.0           |
| No                                                     | 3             | 7.0            |
| <b>Last interrogation documentation available</b>      |               |                |
| Yes                                                    | 35            | 81.4           |
| No                                                     | 8             | 18.6           |

\* the earlier of 3 years post-implant or electronically documented date of death

**Selected Results among treated episodes, N=162**

|                                                     | <b>Number</b> | <b>Percent</b> |
|-----------------------------------------------------|---------------|----------------|
| <b>Range per subject with treated episodes</b>      | 1 to 36       |                |
| <b>Date and time reported</b>                       | 162           | 100.0          |
| <b>Reported as missing electrograms</b>             | 52            | 32.0           |
| <b>Reported as missing interrogation report</b>     | 40            | 25.0           |
| <b>Reported as missing clinical interpretation</b>  | 18            | 11.0           |
| <b>Reported as missing all source documentation</b> | 1             | 0.6            |

**Numbers of interrogations**

|                            |             |
|----------------------------|-------------|
| <b>Total</b>               | <b>493</b>  |
| <b>Per Subject</b>         |             |
| <b>Mean</b>                | <b>11.5</b> |
| <b>Median</b>              | <b>12</b>   |
| <b>Interquartile range</b> | <b>8-13</b> |
| <b>Range</b>               | <b>0-52</b> |

Masoudi FA et al.

APPENDIX J  
CVRN LONGITUDINAL STUDY OF ICDs  
INVESTIGATIVE TEAM

**KPCO:** Frederick Masoudi MD (co-PI), David Magid MD, Karen Glenn BS, Nathaniel Jackson MS, Laura Muhs, Heather Nuanes, Pamela Peterson MD, Liza Reifler MPH, Paul Varosy MD

**KPNC:** Alan Go MD, Jason J. Dea, Dongjie Fan, MSPH, Michael Lauer, MD PhD, Liliana V. Metzger, Nina Sasso, Kiranjit Sidhu, Sue Hee Sung, MPH

**KPNW:** David Smith RPh, PhD, Jill Mesa, Amanda Petrik, Carmel Wax

**KPSC:** Kristi Reynolds PhD MPH, Britta Amundsen, MA, Jonathan Doris MD, Nigel Gupta, MD, Teresa Harrison SM, Jacqueline Porcel, MPH, Tony Yiu, MS

**Marshfield Clinic Research Foundation/ Marshfield Clinic:** Robert Greenlee PhD, MPH (co-PI), Marilyn Bruger, Jay Fuehrer, Romel Garcia-Montilla MD, John Hayes, MD, Aaron Miller PhD, Deborah Multerer, Param Sharma MD, Mary Suits RN, Jeff Van Wormer PhD, Humberto Vidaillet MD

**Meyers Fallon:** Jerry Gurwitz, MD, Robert J. Goldberg, PhD, Jane S. Saczynski, PhD, Jackie Fuller, Mark Mooradian

**Henry Ford Health System:** Andrea Cassidy-Bushrow PhD, Claudio Schuger MD, Dayna Johnson, MPH, Richard Krajenta, BS, Michelle Brown, RN, Debra Veryser, BA, RHIT, Judith Lehman RN, Claire Hooker, Heather Dakki MPH

**Mayo Clinic:** Stephen Hammill, MD

**Touro College:** Alan Kadish, MD
